# Supplementary material for: Extended field-of-view ultrathin microendoscopes for high-resolution two-photon imaging with minimal invasiveness
Source: eLife. 2020 Oct 13;9:e58882. doi: 10.7554/eLife.58882 (PMC7685710; doi:10.7554/eLife.58882)
Supplement: Figure 2—figure supplement 2—source data 1. [file elife-58882-fig2-figsupp2-data1.xlsx]

## Sheet: Panel a
	Type I Corrected		Type I Uncorrected
	Axial	Lateral	Axial	Lateral
x	y	y	y	y
0	6.67604	0.650487	6.63806	0.638711
50	7.31113	0.676141	7.45181	0.670971
100	8.18421	0.748823	8.62778	1.99687
150	9.00787	0.791823	11.8903	3.43703

## Sheet: Panel b
	Type II Corrected		Type II Uncorrected
	Axial	Lateral	Axial	Lateral
x	y	y	y	y
0	6.80358	0.645127	7.60723	0.685245
35	7.14581	0.66499	7.43024	0.667979
70	7.94552	0.699303	8.28788	1.6374
105	9.49661	0.785229	13.2848	3.15817
140	9.9153	0.804083	15.127	4.12108
175	12.2194	1.27885

## Sheet: Panel c
	Type III Corrected		Type III Uncorrected
	Axial	Lateral	Axial	Lateral
x	y	y	y	y
0	8.25051	0.713418	8.52797	0.727317
25	8.21412	0.71383	8.4508	0.728644
50	8.55757	0.725297	9.28963	0.761823
75	9.18201	0.756956	12.7075	0.866947

## Sheet: Panel d
	Type IV Corrected		Type IV Uncorrected
	Axial	Lateral	Axial	Lateral
x	y	y	y	y
0	8.3176	0.689394	8.07929	0.68349
30	8.0381	0.707583	8.22179	0.712557
60	8.71006	0.766853	14.3947	1.10736
90	10.0615	0.859163	12.5019	3.83841
