# Supplementary material for: Extended field-of-view ultrathin microendoscopes for high-resolution two-photon imaging with minimal invasiveness
Source: eLife. 2020 Oct 13;9:e58882. doi: 10.7554/eLife.58882 (PMC7685710; doi:10.7554/eLife.58882)
Supplement: Figure 2—figure supplement 3—source data 1. [file elife-58882-fig2-figsupp3-data1.xlsx]

## Sheet: Panel a
Type I Corrected				Type I Uncorrected
Radial distance	Working distance	Strehl ratio	Objective-endoscope distance	Radial distance	Working distance	Strehl ratio	Objective-endoscope distance
0	216	0.999	51	0	224	0.996	51
0	211	0.999	55	0	218	0.994	55
0	206	0.998	59	0	212	0.989	59
0	202	0.992	63	0	207	0.988	63
0	197	0.999	67	0	201	0.99	67
0	192.5	0.991	71	0	195.5	0.98	71
0	188	0.998	75	0	190	0.987	75
0	184	0.998	79	0	185	0.981	79
0	180	0.995	83	0	179	0.98	83
0	176	0.992	87	0	174	0.983	87
0	172	0.991	91	0	169	0.981	91
0	168	0.992	95	0	164	0.978	95
50	215.3	0.946	51	50	223.3	0.891	51
50	210.3	0.942	55	50	217.3	0.89	55
50	205.3	0.935	59	50	211.3	0.886	59
50	201.3	0.935	63	50	206.3	0.877	63
50	196.3	0.931	67	50	200.3	0.877	67
50	192.3	0.923	71	50	194.3	0.868	71
50	187.3	0.92	75	50	189.3	0.863	75
50	183.3	0.915	79	50	183.3	0.849	79
50	179.3	0.912	83	50	178.3	0.849	83
50	175.3	0.908	87	50	173.3	0.851	87
50	170.3	0.91	91	50	168.3	0.85	91
50	166.3	0.91	95	50	163.3	0.846	95
100	210.8	0.836	51	100	215.8	0.267	51
100	205.8	0.866	55	100	209.8	0.269	55
100	200.8	0.895	59	100	204.3	0.27	59
100	195.8	0.92	63	100	198.8	0.274	63
100	190.8	0.934	67	100	192.8	0.277	67
100	185.8	0.935	71	100	187.8	0.279	71
100	180.8	0.92	75	100	181.8	0.283	75
100	176.8	0.894	79	100	176.8	0.284	79
100	171.8	0.852	83	100	170.8	0.286	83
100	166.8	0.788	87	100	165.8	0.289	87
100	162.8	0.718	91	100	160.8	0.291	91
100	157.8	0.63	95	100	155.8	0.292	95
150	201.6	0.303	51	150	204.6	0.125	51
150	196.6	0.333	55	150	199.6	0.125	55
150	190.6	0.352	59	150	193.6	0.125	59
150	185.6	0.448	63	150	187.1	0.125	63
150	180.6	0.611	67	150	181.1	0.126	67
150	175.6	0.791	71	150	175.6	0.128	71
150	169.6	0.94	75	150	169.6	0.129	75
150	164.6	0.97	79	150	164.1	0.13	79
150	158.6	0.804	83	150	158.6	0.132	83
150	153.6	0.499	87	150	153.1	0.133	87
150	149.6	0.253	91	150	147.6	0.135	91
150	145.6	0.191	95	150	142.6	0.136	95
-50	215.3	0.946	51	-50	223.3	0.891	51
-50	210.3	0.943	55	-50	217.3	0.89	55
-50	205.3	0.935	59	-50	211.3	0.886	59
-50	201.3	0.935	63	-50	206.3	0.877	63
-50	196.3	0.931	67	-50	200.3	0.877	67
-50	192.3	0.924	71	-50	194.3	0.868	71
-50	187.3	0.921	75	-50	189.3	0.864	75
-50	183.3	0.916	79	-50	183.3	0.849	79
-50	179.3	0.911	83	-50	178.3	0.849	83
-50	175.3	0.907	87	-50	173.3	0.851	87
-50	170.3	0.909	91	-50	168.3	0.85	91
-50	166.3	0.909	95	-50	163.3	0.846	95
-100	210.8	0.836	51	-100	215.8	0.267	51
-100	205.8	0.866	55	-100	209.8	0.269	55
-100	200.8	0.895	59	-100	204.3	0.27	59
-100	195.8	0.92	63	-100	198.8	0.274	63
-100	190.8	0.934	67	-100	192.8	0.277	67
-100	185.8	0.935	71	-100	187.8	0.279	71
-100	180.8	0.92	75	-100	181.8	0.283	75
-100	176.8	0.894	79	-100	176.8	0.284	79
-100	171.8	0.852	83	-100	170.8	0.286	83
-100	166.8	0.788	87	-100	165.8	0.289	87
-100	162.8	0.719	91	-100	160.8	0.291	91
-100	157.8	0.63	95	-100	155.8	0.292	95
-150	201.6	0.303	51	-150	204.6	0.125	51
-150	196.6	0.333	55	-150	199.6	0.125	55
-150	190.6	0.352	59	-150	193.6	0.125	59
-150	185.6	0.448	63	-150	187.1	0.125	63
-150	180.6	0.611	67	-150	181.1	0.126	67
-150	175.6	0.79	71	-150	175.6	0.128	71
-150	169.6	0.94	75	-150	169.6	0.13	75
-150	164.6	0.97	79	-150	164.1	0.13	79
-150	158.6	0.804	83	-150	158.6	0.132	83
-150	153.6	0.499	87	-150	153.1	0.133	87
-150	149.6	0.253	91	-150	147.6	0.135	91
-150	145.6	0.191	95	-150	142.6	0.136	95

## Sheet: Panel b
Type II Corrected				Type II Uncorrected
Radial distance	Working distance	Strehl ratio	Objective-endoscope distance	Radial distance	Working distance	Strehl ratio	Objective-endoscope distance
0	263	0.958	40	0	258	0.961	50
0	251	0.958	50	0	244	0.958	60
0	240	0.964	60	0	231	0.984	70
0	229	0.951	70	0	218	0.979	80
0	219	0.952	80	0	206	0.993	90
0	210	0.966	90	0	203	0.979	92
0	208	0.963	92	0	201	0.992	94
0	207	0.962	94	0	198	0.972	96
0	205	0.966	96	0	196	0.988	98
0	203	0.967	98	0	194	0.994	100
0	201	0.966	100	0	191	0.98	102
0	199	0.962	102	0	189	0.991	104
0	198	0.964	104	0	187	0.995	106
0	196	0.967	106	0	184	0.981	108
0	194	0.965	108	0	182	0.991	110
0	193	0.961	110	0	171	0.994	120
0	185	0.952	120	0	160	0.994	130
0	176	0.962	130	0	149	0.987	140
0	169	0.967	140	0	139	0.992	150
0	162	0.964	150	35	257.5	0.891	50
0	155	0.966	160	35	243.5	0.886	60
0	148	0.973	170	35	230.5	0.89	70
35	262.4	0.929	40	35	217.5	0.875	80
35	249.4	0.938	50	35	204.5	0.866	90
35	238.4	0.942	60	35	202.5	0.873	92
35	226.4	0.921	70	35	200.5	0.869	94
35	216.4	0.935	80	35	197.5	0.874	96
35	207.4	0.94	90	35	195.5	0.873	98
35	205.4	0.94	92	35	192.5	0.872	100
35	203.4	0.94	94	35	190.5	0.875	102
35	201.4	0.94	96	35	188.5	0.871	104
35	199.4	0.941	98	35	185.5	0.874	106
35	197.4	0.939	100	35	183.5	0.875	108
35	196.4	0.939	102	35	181.5	0.871	110
35	194.4	0.944	104	35	169.5	0.872	120
35	192.4	0.946	106	35	158.5	0.868	130
35	190.4	0.946	108	35	148.5	0.858	140
35	188.4	0.941	110	35	137.5	0.857	150
35	180.4	0.949	120	70	251.5	0.237	50
35	172.4	0.941	130	70	237.5	0.245	60
35	164.4	0.925	140	70	224.5	0.242	70
35	157.4	0.883	150	70	211.5	0.243	80
35	149.4	0.883	160	70	198.5	0.263	90
35	142.4	0.854	170	70	195.5	0.278	92
70	256.5	0.568	40	70	193.5	0.268	94
70	243.5	0.633	50	70	191.5	0.256	96
70	231.5	0.702	60	70	186.5	0.299	98
70	220.5	0.769	70	70	184.5	0.3	100
70	209.5	0.832	80	70	181.5	0.3	102
70	198.5	0.881	90	70	179.5	0.303	104
70	196.5	0.887	92	70	177.5	0.304	106
70	194.5	0.891	94	70	174.5	0.304	108
70	192.5	0.894	96	70	172.5	0.307	110
70	190.5	0.895	98	70	161.5	0.313	120
70	188.5	0.895	100	70	150.5	0.319	130
70	186.5	0.894	102	70	139.5	0.326	140
70	184.5	0.89	104	70	129.5	0.332	150
70	182.5	0.885	106	105	237	0.108	50
70	180.5	0.877	108	105	223	0.109	60
70	178.5	0.867	110	105	209	0.112	70
70	169.5	0.809	120	105	196	0.111	80
70	160.5	0.709	130	105	183	0.11	90
70	151.5	0.573	140	105	180	0.109	92
70	143.5	0.422	150	105	178	0.11	94
70	137.5	0.285	160	105	175	0.11	96
70	128.5	0.269	170	105	173	0.11	98
105	243	0.222	40	105	170	0.111	100
105	231	0.264	50	105	168	0.111	102
105	218	0.319	60	105	165	0.112	104
105	206	0.381	70	105	163	0.112	106
105	195	0.435	80	105	161	0.112	108
105	185	0.556	90	105	158	0.114	110
105	183	0.594	92	105	146	0.116	120
105	181	0.634	94	105	135	0.12	130
105	179	0.674	96	105	125	0.122	140
105	176	0.706	98	105	114	0.127	150
105	175	0.747	100	140	217	0.071	50
105	173	0.778	102	140	203	0.07	60
105	170	0.813	104	140	189	0.073	70
105	168	0.84	106	140	177	0.071	80
105	166	0.865	108	140	165	0.071	90
105	164	0.881	110	140	162	0.071	92
105	154	0.804	120	140	159	0.07	94
105	144	0.523	130	140	156.5	0.071	96
105	134	0.312	140	140	154	0.071	98
105	126	0.159	150	140	151	0.071	100
105	118	0.111	160	140	149	0.071	102
105	101.5	0.085	170	140	147	0.071	104
140	226	0.098	40	140	145	0.071	106
140	213	0.108	50	140	142	0.072	108
140	198	0.129	60	140	140	0.071	110
140	186	0.171	70	140	129	0.071	120
140	174	0.23	80	140	117	0.074	130
140	163	0.369	90	140	106	0.075	140
140	160	0.495	92	140	96	0.074	150
140	158	0.634	94	-35	257.5	0.891	50
140	155	0.774	96	-35	243.5	0.886	60
140	153	0.876	98	-35	230.5	0.891	70
140	150	0.932	100	-35	217.5	0.876	80
140	148	0.915	102	-35	204.5	0.865	90
140	145	0.843	104	-35	202.5	0.872	92
140	143	0.722	106	-35	200.5	0.868	94
140	141	0.595	108	-35	197.5	0.873	96
140	139	0.493	110	-35	195.5	0.873	98
140	129	0.225	120	-35	192.5	0.871	100
140	119	0.131	130	-35	190.5	0.875	102
140	107	0.109	140	-35	188.5	0.87	104
140	95	0.104	150	-35	185.5	0.873	106
140	87	0.09	160	-35	183.5	0.875	108
140	75	0.093	170	-35	181.5	0.87	110
-35	262.5	0.929	40	-35	169.5	0.872	120
-35	249.5	0.937	50	-35	158.5	0.868	130
-35	238.5	0.942	60	-35	148.5	0.858	140
-35	226.5	0.92	70	-35	137.5	0.858	150
-35	216.5	0.934	80	-70	251.5	0.237	50
-35	207.5	0.939	90	-70	237.5	0.245	60
-35	205.5	0.939	92	-70	224.5	0.242	70
-35	203.5	0.94	94	-70	211.5	0.243	80
-35	201.5	0.941	96	-70	198.5	0.263	90
-35	199.5	0.941	98	-70	195.5	0.278	92
-35	197.5	0.94	100	-70	193.5	0.268	94
-35	196.5	0.94	102	-70	191.5	0.256	96
-35	194.5	0.945	104	-70	186.5	0.299	98
-35	192.5	0.946	106	-70	184.5	0.3	100
-35	190.5	0.947	108	-70	181.5	0.3	102
-35	188.5	0.942	110	-70	179.5	0.303	104
-35	180.5	0.949	120	-70	177.5	0.304	106
-35	172.5	0.941	130	-70	174.5	0.304	108
-35	164.5	0.924	140	-70	172.5	0.307	110
-35	157.5	0.884	150	-70	161.5	0.313	120
-35	149.5	0.883	160	-70	150.5	0.319	130
-35	142.5	0.854	170	-70	139.5	0.326	140
-70	256.5	0.568	40	-70	129.5	0.332	150
-70	243.5	0.633	50	-105	237	0.108	50
-70	231.5	0.702	60	-105	223	0.109	60
-70	220.5	0.769	70	-105	209	0.112	70
-70	209.5	0.832	80	-105	196	0.111	80
-70	198.5	0.881	90	-105	183	0.11	90
-70	196.5	0.887	92	-105	180	0.109	92
-70	194.5	0.891	94	-105	178	0.11	94
-70	192.5	0.894	96	-105	175	0.11	96
-70	190.5	0.895	98	-105	173	0.11	98
-70	188.5	0.895	100	-105	170	0.111	100
-70	186.5	0.893	102	-105	168	0.111	102
-70	184.5	0.889	104	-105	165	0.112	104
-70	182.5	0.884	106	-105	163	0.112	106
-70	180.5	0.876	108	-105	161	0.112	108
-70	178.5	0.866	110	-105	158	0.114	110
-70	169.5	0.809	120	-105	146	0.116	120
-70	160.5	0.709	130	-105	135	0.12	130
-70	151.5	0.574	140	-105	125	0.123	140
-70	143.5	0.422	150	-105	114	0.127	150
-70	137.5	0.285	160	-140	217	0.071	50
-70	128.5	0.269	170	-140	203	0.07	60
-105	243	0.222	40	-140	189	0.073	70
-105	231	0.264	50	-140	177	0.071	80
-105	218	0.319	60	-140	165	0.071	90
-105	206	0.381	70	-140	162	0.071	92
-105	195	0.435	80	-140	159	0.07	94
-105	185	0.556	90	-140	156.5	0.071	96
-105	183	0.594	92	-140	154	0.071	98
-105	181	0.635	94	-140	151	0.071	100
-105	179	0.674	96	-140	149	0.071	102
-105	176	0.706	98	-140	147	0.071	104
-105	174	0.746	100	-140	145	0.071	106
-105	173	0.778	102	-140	142	0.072	108
-105	170	0.813	104	-140	140	0.071	110
-105	168	0.841	106	-140	129	0.071	120
-105	166	0.865	108	-140	117	0.074	130
-105	164	0.881	110	-140	106	0.075	140
-105	154	0.804	120	-140	96	0.074	150
-105	144	0.523	130
-105	134	0.312	140
-105	126	0.159	150
-105	118	0.111	160
-105	101.5	0.086	170
-140	226	0.098	40
-140	213	0.108	50
-140	198	0.129	60
-140	186	0.171	70
-140	174	0.23	80
-140	163	0.369	90
-140	160	0.495	92
-140	158	0.634	94
-140	155	0.774	96
-140	153	0.876	98
-140	150	0.932	100
-140	148	0.915	102
-140	145	0.844	104
-140	143	0.723	106
-140	141	0.595	108
-140	139	0.493	110
-140	129	0.225	120
-140	119	0.131	130
-140	107	0.109	140
-140	95	0.104	150
-140	87	0.091	160
-140	75	0.093	170

## Sheet: Panel c
Type III Corrected				Type III Uncorrected
Radial distance	Working distance	Strehl ratio	Objective-endoscope distance	Radial distance	Working distance	Strehl ratio	Objective-endoscope distance
0	218	0.989	28	0	244	0.987	28
0	212	0.99	32	0	237	0.989	32
0	206	0.99	36	0	231	0.989	36
0	200	0.991	40	0	224	0.987	40
0	194	0.992	44	0	218	0.989	44
0	188	0.991	48	0	212	0.989	48
0	183	0.989	52	0	207	0.989	52
0	177	0.992	56	0	201	0.992	56
0	172	0.99	60	0	195	0.991	60
0	167	0.986	64	0	190	0.992	64
0	161	0.987	68	0	185	0.988	68
0	156	0.986	72	0	179	0.99	72
0	151	0.983	76	0	174	0.991	76
0	147	0.983	80	0	169	0.99	80
0	142	0.985	84	0	164	0.988	84
0	137	0.98	88	0	160	0.988	88
0	133	0.979	92	0	155	0.991	92
0	128	0.975	96	0	150	0.985	96
0	124	0.977	100	0	146	0.989	100
25	218.2	0.975	28	25	243.2	0.981	28
25	212.2	0.973	32	25	237.2	0.979	32
25	206.2	0.971	36	25	230.2	0.98	36
25	200.2	0.968	40	25	224.2	0.979	40
25	194.2	0.963	44	25	218.2	0.977	44
25	188.2	0.952	48	25	212.2	0.974	48
25	182.2	0.931	52	25	206.2	0.969	52
25	177.2	0.944	56	25	200.2	0.96	56
25	172.2	0.95	60	25	195.2	0.96	60
25	167.2	0.952	64	25	189.2	0.96	64
25	162.2	0.95	68	25	184.2	0.966	68
25	157.2	0.948	72	25	179.2	0.968	72
25	152.2	0.946	76	25	174.2	0.968	76
25	147.2	0.944	80	25	169.2	0.968	80
25	142.2	0.942	84	25	164.2	0.969	84
25	137.2	0.937	88	25	159.2	0.967	88
25	133.2	0.942	92	25	154.2	0.959	92
25	128.2	0.953	96	25	150.2	0.961	96
25	123.2	0.952	100	25	145.2	0.948	100
50	217	0.897	28	50	242	0.907	28
50	211	0.896	32	50	236	0.904	32
50	204.5	0.897	36	50	229	0.898	36
50	199	0.9	40	50	223	0.893	40
50	193	0.906	44	50	216	0.871	44
50	187	0.912	48	50	211	0.877	48
50	181	0.916	52	50	205	0.873	52
50	176	0.919	56	50	199	0.87	56
50	170	0.924	60	50	194	0.873	60
50	165	0.939	64	50	188	0.866	64
50	159	0.952	68	50	183	0.864	68
50	154	0.962	72	50	178	0.857	72
50	149	0.961	76	50	173	0.847	76
50	144	0.948	80	50	168	0.836	80
50	139	0.955	84	50	163	0.833	84
50	134	0.95	88	50	158	0.834	88
50	129	0.929	92	50	153	0.829	92
50	124	0.914	96	50	149	0.824	96
50	119	0.891	100	50	144	0.809	100
75	213	0.723	28	75	239	0.697	28
75	206	0.743	32	75	233	0.687	32
75	200	0.765	36	75	226.5	0.672	36
75	194	0.789	40	75	220	0.661	40
75	188	0.815	44	75	214	0.646	44
75	182	0.842	48	75	208	0.63	48
75	177	0.85	52	75	202	0.62	52
75	170	0.898	56	75	196.5	0.609	56
75	164	0.922	60	75	191	0.602	60
75	158	0.938	64	75	185	0.59	64
75	153	0.951	68	75	180	0.579	68
75	147	0.955	72	75	175	0.567	72
75	142	0.954	76	75	170	0.559	76
75	136	0.933	80	75	165	0.553	80
75	131	0.874	84	75	160	0.547	84
75	125	0.814	88	75	155	0.54	88
75	120	0.736	92	75	150	0.534	92
75	115	0.644	96	75	145	0.527	96
75	110	0.562	100	75	141	0.512	100
-25	218.2	0.975	28	-25	243.2	0.981	28
-25	212.2	0.973	32	-25	237.2	0.979	32
-25	206.2	0.971	36	-25	230.2	0.98	36
-25	200.2	0.968	40	-25	224.2	0.979	40
-25	194.2	0.963	44	-25	218.2	0.976	44
-25	188.2	0.952	48	-25	212.2	0.973	48
-25	182.2	0.93	52	-25	206.2	0.969	52
-25	177.2	0.944	56	-25	200.2	0.959	56
-25	172.2	0.951	60	-25	195.2	0.961	60
-25	167.2	0.952	64	-25	189.2	0.961	64
-25	162.2	0.95	68	-25	184.2	0.967	68
-25	157.2	0.948	72	-25	179.2	0.968	72
-25	152.2	0.946	76	-25	174.2	0.969	76
-25	147.2	0.944	80	-25	169.2	0.969	80
-25	142.2	0.942	84	-25	164.2	0.969	84
-25	137.2	0.937	88	-25	159.2	0.967	88
-25	133.2	0.942	92	-25	154.2	0.959	92
-25	128.2	0.953	96	-25	150.2	0.96	96
-25	123.2	0.953	100	-25	145.2	0.947	100
-50	217	0.897	28	-50	242	0.907	28
-50	211	0.897	32	-50	236	0.904	32
-50	204.5	0.897	36	-50	229	0.897	36
-50	199	0.901	40	-50	223	0.893	40
-50	193	0.907	44	-50	216	0.87	44
-50	187	0.913	48	-50	211	0.876	48
-50	181	0.916	52	-50	205	0.874	52
-50	176	0.92	56	-50	199	0.871	56
-50	170	0.923	60	-50	194	0.873	60
-50	165	0.938	64	-50	188	0.866	64
-50	159	0.952	68	-50	183	0.864	68
-50	154	0.962	72	-50	178	0.857	72
-50	149	0.961	76	-50	173	0.847	76
-50	144	0.949	80	-50	168	0.835	80
-50	139	0.954	84	-50	163	0.834	84
-50	134	0.95	88	-50	158	0.834	88
-50	129	0.93	92	-50	153	0.829	92
-50	124	0.913	96	-50	149	0.824	96
-50	119	0.891	100	-50	144	0.809	100
-75	213	0.722	28	-75	239	0.698	28
-75	206	0.742	32	-75	233	0.688	32
-75	200	0.765	36	-75	226.5	0.672	36
-75	194	0.788	40	-75	220	0.66	40
-75	188	0.815	44	-75	214	0.646	44
-75	182	0.842	48	-75	208	0.629	48
-75	177	0.849	52	-75	202	0.62	52
-75	170	0.898	56	-75	196.5	0.61	56
-75	164	0.923	60	-75	191	0.602	60
-75	158	0.939	64	-75	185	0.59	64
-75	153	0.952	68	-75	180	0.579	68
-75	147	0.954	72	-75	175	0.566	72
-75	142	0.954	76	-75	170	0.56	76
-75	136	0.933	80	-75	165	0.553	80
-75	131	0.874	84	-75	160	0.547	84
-75	125	0.814	88	-75	155	0.54	88
-75	120	0.736	92	-75	150	0.534	92
-75	115	0.644	96	-75	145	0.527	96
-75	110	0.562	100	-75	141	0.512	100

## Sheet: Panel d
Type IV Corrected				Type IV Uncorrected
Radial distance	Working distance	Strehl ratio	Objective-endoscope distance	Radial distance	Working distance	Strehl ratio	Objective-endoscope distance
0	247	0.966	44	0	255	0.979	48
0	241	0.962	48	0	249	0.984	52
0	236	0.965	52	0	243	0.984	56
0	231	0.965	56	0	237	0.983	60
0	226	0.963	60	0	231	0.984	64
0	222	0.96	64	0	225	0.987	68
0	217	0.963	68	0	219	0.991	72
0	213	0.958	72	0	213	0.987	76
0	208	0.958	76	30	254.2	0.914	48
0	204	0.958	80	30	247.2	0.913	52
30	246.2	0.901	44	30	241.2	0.912	56
30	240.2	0.906	48	30	235.2	0.908	60
30	235.2	0.906	52	30	229.2	0.905	64
30	230.2	0.906	56	30	223.2	0.903	68
30	225.2	0.907	60	30	217.2	0.9	72
30	220.2	0.908	64	30	212.2	0.892	76
30	215.2	0.909	68	60	247.3	0.338	48
30	211.2	0.918	72	60	240.3	0.327	52
30	206.2	0.925	76	60	234.3	0.315	56
30	202.2	0.938	80	60	227.3	0.306	60
60	237.3	0.771	44	60	219.3	0.302	64
60	232.3	0.817	48	60	213.3	0.305	68
60	226.3	0.865	52	60	208.3	0.307	72
60	221.3	0.904	56	60	202.3	0.311	76
60	215.3	0.941	60	90	230	0.144	48
60	210.3	0.97	64	90	223.5	0.142	52
60	205.3	0.978	68	90	217	0.142	56
60	199.3	0.952	72	90	211	0.141	60
60	194.3	0.892	76	90	205	0.14	64
60	189.3	0.797	80	90	198.5	0.141	68
90	221	0.317	44	90	193	0.141	72
90	216	0.356	48	90	187	0.142	76
90	210	0.486	52	-30	254.2	0.914	48
90	203	0.667	56	-30	247.2	0.913	52
90	197	0.851	60	-30	241.2	0.912	56
90	191	0.888	64	-30	235.2	0.908	60
90	185	0.705	68	-30	229.2	0.905	64
90	179	0.446	72	-30	223.2	0.904	68
90	175	0.295	76	-30	217.2	0.901	72
90	171	0.205	80	-30	212.2	0.893	76
-30	246.2	0.9	44	-60	247.3	0.338	48
-30	240.2	0.905	48	-60	240.3	0.327	52
-30	235.2	0.905	52	-60	234.3	0.315	56
-30	230.2	0.905	56	-60	227.3	0.306	60
-30	225.2	0.906	60	-60	219.3	0.302	64
-30	220.2	0.907	64	-60	213.3	0.305	68
-30	215.2	0.91	68	-60	208.3	0.307	72
-30	211.2	0.919	72	-60	202.3	0.311	76
-30	206.2	0.926	76	-90	230	0.144	48
-30	202.2	0.938	80	-90	223.5	0.142	52
-60	237.3	0.771	44	-90	217	0.142	56
-60	232.3	0.817	48	-90	211	0.141	60
-60	226.3	0.865	52	-90	205	0.14	64
-60	221.3	0.904	56	-90	198.5	0.141	68
-60	215.3	0.94	60	-90	193	0.141	72
-60	210.3	0.971	64	-90	187	0.142	76
-60	205.3	0.978	68
-60	199.3	0.952	72
-60	194.3	0.892	76
-60	189.3	0.797	80
-90	221	0.317	44
-90	216	0.356	48
-90	210	0.486	52
-90	203	0.667	56
-90	197	0.851	60
-90	191	0.888	64
-90	185	0.705	68
-90	179	0.446	72
-90	175	0.295	76
-90	171	0.205	80
