# Supplementary material for: Extended field-of-view ultrathin microendoscopes for high-resolution two-photon imaging with minimal invasiveness
Source: eLife. 2020 Oct 13;9:e58882. doi: 10.7554/eLife.58882 (PMC7685710; doi:10.7554/eLife.58882)
Supplement: Figure 2—figure supplement 4—source data 1. [file elife-58882-fig2-figsupp4-data1.xlsx]

## Sheet: Panel a
λ	Strehl ratio		Best Strehl ratio	Defocused working distance
800	0.19		0.916	161.6
820	0.26		0.925	162.6
840	0.453		0.927	164.6
860	0.654		0.931	165.6
880	0.814		0.93	167.6
900	0.909		0.937	168.6
920	0.94		0.94	169.6
940	0.918		0.942	170.6
960	0.861		0.944	171.6
980	0.784		0.946	172.6
1000	0.7		0.948	173.6
1020	0.617		0.95	174.6
1040	0.539		0.951	175.6

## Sheet: Panel b
λ	Strehl ratio		Best Strehl ratio	Defocused working distance
800	0.041		0.91	132
820	0.078		0.912	136
840	0.148		0.921	139
860	0.216		0.925	142
880	0.545		0.928	145
900	0.835		0.928	148
920	0.932		0.932	150
940	0.839		0.93	153
960	0.65		0.934	155
980	0.453		0.934	157
1000	0.293		0.934	159
1020	0.181		0.937	161
1040	0.112		0.939	163

## Sheet: Panel c
λ	Strehl ratio		Best Strehl ratio	Defocused working distance
800	0.354		0.889	158
820	0.524		0.894	159
840	0.674		0.899	160
860	0.79		0.904	161
880	0.868		0.91	162
900	0.91		0.917	163
920	0.922		0.922	164
940	0.913		0.927	165
960	0.887		0.929	166
980	0.853		0.927	167
1000	0.813		0.937	167
1020	0.77		0.937	168
1040	0.728		0.942	168

## Sheet: Panel d
λ	Strehl ratio		Best Strehl ratio	Defocused working distance
800	0.076		0.751	184
820	0.132		0.771	186
840	0.214		0.785	189
860	0.369		0.807	191
880	0.612		0.824	193
900	0.789		0.838	195
920	0.851		0.851	197
940	0.814		0.861	199
960	0.714		0.866	200
980	0.586		0.876	202
1000	0.459		0.878	203.5
1020	0.347		0.889	205
1040	0.256		0.896	206
