# Supplementary material for: Extended field-of-view ultrathin microendoscopes for high-resolution two-photon imaging with minimal invasiveness
Source: eLife. 2020 Oct 13;9:e58882. doi: 10.7554/eLife.58882 (PMC7685710; doi:10.7554/eLife.58882)
Supplement: Figure 3—figure supplement 4—source data 1. [file elife-58882-fig3-figsupp4-data1.xlsx]

## Sheet: Panel a
Radial distance	Magnification correction factor
-183.687	0.975393
-173.434	0.925373
-162.328	0.930375
-151.221	0.930375
-140.969	0.930375
-129.862	0.930375
-119.61	0.915369
-108.503	0.930375
-97.3967	0.915369
-86.29	0.930375
-76.0377	0.930375
-64.9311	0.930375
-54.6788	0.902506
-43.5722	0.935247
-32.4656	0.935247
-20.5046	0.935247
-11.1066	0.950253
-0.854357	0.950253
10.2523	0.932518
20.5046	0.917512
32.4656	0.917512
42.7178	0.868743
53.8245	0.961637
64.9311	0.946631
78.6008	0.946631
86.29	0.961637
97.3967	0.995401
108.503	0.930375
118.756	0.950383
129.862	0.975393

## Sheet: Panel b
Radial distance	Magnification correction factor
-173.434	1.30052
-165.745	1.4089
-158.91	1.35077
-152.075	1.30348
-145.241	1.20594
-135.843	1.09339
-126.445	0.967987
-116.193	0.950253
-105.086	0.90465
-93.1249	0.889644
-82.8726	0.876782
-70.9116	0.865634
-59.805	0.816865
-47.844	0.844733
-35.0286	0.831871
-21.3589	0.831871
-11.1066	0.85588
0.854357	0.865634
12.8154	0.837766
23.922	0.837766
36.7373	0.826619
48.6983	0.776598
60.6593	0.88064
73.4747	0.88064
88.8531	0.893503
96.5423	0.917512
108.503	0.967532
119.61	0.902506
130.717	0.930375
141.823	0.984396
152.075	1.06443
162.328	1.17697
170.871	1.31632
178.561	1.41385
185.395	1.53276
191.376	1.46309

## Sheet: Panel c
Radial distance	Magnification correction factor
-130.717	0.900363
-119.61	0.925373
-108.503	0.915369
-98.251	0.930375
-87.1444	0.930375
-76.0377	0.915369
-65.7855	0.915369
-54.6788	0.930375
-43.5722	0.915369
-32.4656	0.915369
-22.2133	0.948109
-11.1066	0.948109
0	0.933103
9.39792	0.933103
20.5046	0.933103
31.6112	0.915369
42.7178	0.915369
53.8245	0.915369
64.0768	0.915369
75.1834	0.930375
86.29	0.915369
97.3967	0.930375
107.649	0.930375
118.756	0.925373
129.008	0.900363

## Sheet: Panel d
Radial distance	Magnification correction factor
-182.832	1.46309
-175.997	1.35471
-168.308	1.20571
-160.619	1.09317
-151.221	1.01314
-140.115	0.933103
-129.008	0.8875
-117.901	0.8875
-106.795	0.874638
-94.8336	0.850628
-83.727	0.837766
-71.766	0.826619
-58.9506	0.813756
-46.9896	0.826619
-34.1743	0.826619
-22.2133	0.854487
-11.1066	0.854487
1.70871	0.854487
11.961	0.841625
24.7763	0.841625
36.7373	0.813756
48.6983	0.837766
61.5137	0.850628
73.4747	0.850628
84.5813	0.874638
95.688	0.902506
107.649	0.917512
118.756	0.971534
129.008	1.06443
139.26	1.17697
147.804	1.31632
155.493	1.41385
162.328	1.53276
168.308	1.46309
