# Supplementary material for: Extended field-of-view ultrathin microendoscopes for high-resolution two-photon imaging with minimal invasiveness
Source: eLife. 2020 Oct 13;9:e58882. doi: 10.7554/eLife.58882 (PMC7685710; doi:10.7554/eLife.58882)
Supplement: Figure 3—source data 1. [file elife-58882-fig3-data1.xlsx]

## Sheet: Panel c
Type I Corrected						Type I Uncorrected
	Axial		Lateral				Axial		Lateral
x	y	sd	y	sd		x	y	sd	y	sd
0.9	8.84751	0.463007	0.937263	0.0658157		1	9.53721	0.707023	0.907987	0.0481495
46.7	10.1787	0.994856	1.11178	0.0663913		51.1	9.73446	0.713236	1.00589	0.0504666
97.9	8.88714	0.769745	1.23213	0.163386		101.2	10.7027	2.19394	1.2245	0.097919
155.5	10.9832	1.6956	1.52419	0.274239		150.5	13.8435	3.2115	1.56747	0.24142
221.5	16.0419	3.25204	1.77035	0.179535

## Sheet: Panel e
Type II Corrected						Type II Uncorrected
	Axial		Lateral				Axial		Lateral
x	y	sd	y	sd		x	y	sd	y	sd
0.752114	8.86594	0.318259	0.870354	0.0541183		0.929873	8.91404	0.417928	0.798966	0.0394574
38.6171	9.38952	0.493984	0.922809	0.0476372		47.3061	10.1628	1.41842	0.868533	0.0420394
82.207	8.57115	0.434522	1.14847	0.147106		96.7803	13.5397	2.30932	1.14832	0.0937417
135.177	9.31067	0.757725	1.35376	0.109222		149.196	25.4429	3.1519	1.96598	0.55987
201.933	13.9582	2.16581	2.10931	0.319141

## Sheet: Panel g
Type III Corrected						Type III Uncorrected
	Axial		Lateral				Axial		Lateral
x	y	sd	y	sd		x	y	sd	y	sd
0.95195	7.45577	0.465896	0.890628	0.0134577		0.717815	7.71737	0.197244	0.875761	0.0496209
48.5176	8.12785	0.635317	0.96338	0.050722		35.479	7.97547	0.891345	0.948677	0.0347692
99.6435	8.79074	1.53578	1.04837	0.0389967		69.501	10.7902	2.48276	1.17855	0.0648548
154.485	9.57412	1.49897	1.26777	0.0975082		101.132	12.6734	4.1401	1.62622	0.408645

## Sheet: Panel i
Type IV Corrected						Type IV Uncorrected
	Axial		Lateral				Axial		Lateral
x	y	sd	y	sd		x	y	sd	y	sd
0.836173	8.32164	1.20535	0.887766	0.125831		0.893969	8.8624	1.04652	0.78294	0.0756689
44.0056	8.99636	1.26334	1.05029	0.0901179		46.1738	10.8692	1.95321	0.961583	0.114734
97.5969	11.8629	2.22216	1.56762	0.239802		96.8278	14.6587	4.73388	1.96218	0.674393
