# Supplementary material for: Extended field-of-view ultrathin microendoscopes for high-resolution two-photon imaging with minimal invasiveness
Source: eLife. 2020 Oct 13;9:e58882. doi: 10.7554/eLife.58882 (PMC7685710; doi:10.7554/eLife.58882)
Supplement: Figure 4—figure supplement 1—source data 1. [file elife-58882-fig4-figsupp1-data1.xlsx]

## Sheet: panel a
Manual SNR threshold (x)	Recall for Uncorrected (y)		Recall for Corrected (y)				CaImAn SNR threshold (x)	Recall for Uncorrected (y)		Recall for Corrected (y)
	MEAN	SEM	MEAN	SEM				MEAN	SEM	MEAN	SEM
5	0.863272	0.00604496	0.952303	0.00275871			0.25	0.397288	0.0256646	0.515275	0.0323835
10	0.523527	0.0161603	0.710641	0.00913667			0.5	0.271771	0.0197831	0.42693	0.0257552
12.5	0.266018	0.0187522	0.484743	0.0145882			1	0.150571	0.013538	0.324365	0.0221058
15	0.175967	0.0145285	0.379785	0.0137415			1.5	0.0963655	0.00921902	0.265841	0.019195
20	0.0927159	0.0109946	0.253948	0.0167163			2	0.0642225	0.00773347	0.210351	0.0188674

## Sheet: panel b
Manual SNR threshold (x)	Precision for Uncorrected (y)		Precision for Corrected (y)				CaImAn SNR threshold (x)	Precision for Uncorrected (y)		Precision for Corrected (y)
	MEAN	SEM	MEAN	SEM				MEAN	SEM	MEAN	SEM
5	1	0	1	0			0.25	0.741894	0.0236217	0.69511	0.0208162
10	1	0	1	0			0.5	0.911149	0.0115931	0.913376	0.0100675
12.5	1	0	1	0			1	0.997446	0.00255428	0.996975	0.00120613
15	1	0	1	0			1.5	1	0	0.999132	0.000868056
20	1	0	1	0			2	1	0	1	0

## Sheet: panel c
Manual SNR threshold (x)	F1 for Uncorrected (y)		F1 for Corrected (y)				CaImAn SNR threshold (x)	F1 for Uncorrected (y)		F1 for Corrected (y)
	MEAN	SEM	MEAN	SEM				MEAN	SEM	MEAN	SEM
5	0.926529	0.00349752	0.975553	0.00144973			0.25	0.509075	0.0138926	0.582508	0.0121894
10	0.686111	0.0135164	0.83058	0.00625548			0.5	0.414547	0.0212519	0.577013	0.021045
12.5	0.417564	0.0226239	0.651932	0.0131589			1	0.259694	0.0199258	0.486222	0.0244629
15	0.297244	0.0205236	0.549354	0.0143759			1.5	0.174776	0.015081	0.417129	0.0233966
20	0.168234	0.0181859	0.402806	0.0209295			2	0.119913	0.013429	0.344465	0.0250468

## Sheet: panel d
# of ROIs/area for Uncorrected
Manual	CaImAn			MEAN	SEM
0.496873	0.27604		Manual	0.71629	0.11504
1.33906	0.203769		CaImAn	0.26256	0.07274
0.333793	0.226503
0.190505	0.0254007
0.902983	0.0780356
0.904914	0.0782025
0.868328	0.314769
0.692576	0.733923
0.717583	0.42639

## Sheet: panel e
# of ROIs/area for Corrected
Manual	CaImAn			MEAN	SEM
0.292742	0.505646		Manual	0.56256	0.09281
0.369482	0.339924		CaImAn	0.40055	0.06085
0.871698	0.201161
0.651961	0.63093
0.448625	0.344293
0.740862	0.381326
