# Supplementary material for: Extended field-of-view ultrathin microendoscopes for high-resolution two-photon imaging with minimal invasiveness
Source: eLife. 2020 Oct 13;9:e58882. doi: 10.7554/eLife.58882 (PMC7685710; doi:10.7554/eLife.58882)
Supplement: Figure 4—figure supplement 2—source data 1. [file elife-58882-fig4-figsupp2-data1.xlsx]

## Sheet: panel a
Peak-SNR-threshold (x)	# of ROIs for Uncorrected (y)		# of ROIs for Corrected (y)
	MEAN	SEM	MEAN	SEM
0.25	345.333	2.22985	350	2.52763
0.5	190.778	3.29047	220.889	6.20583
1	95.7778	2.99434	153.111	4.83748
1.5	61	1.97906	125	4.22624
2	40	1.64148	97.6667	2.80377

## Sheet: panel b
SNR for Uncorrected	SNR for Corrected
48.7826	45.3193		MEAN	SEM
44.5445	30.1396	Uncorrected	13.9131	0.4589
26.313	45.2259	Corrected	21.2489	2.24558
33.9119	42.6975
44.1171	36.8879
33.5244	26.9119
48.6088	35.9507
42.8903	32.6685
20.7315	31.9232
29.8601	29.4577
32.2692	27.422
42.5924	39.0074
17.3494	25.5702
37.6581	32.3053
36.9171	39.9765
29.4115	40.0164
19.9045	38.1526
31.0723	59.9773
28.7824	32.5407
40.6773	35.0879
19.7854	42.6405
29.0822	18.8605
22.1412	29.2848
18.534	29.5649
23.5093	32.5131
17.0098	39.6742
12.3757	28.7428
22.0068	42.3519
11.6813	33.5896
26.3185	21.8095
21.5367	25.7738
22.394	16.0255
31.0508	14.4743
21.8086	28.4306
9.3404	11.9842
19.269	24.116
15.4794	23.8418
25.0683	27.6909
14.7218	11.5521
20.4357	47.2576
19.6561	22.092
8.09986	18.241
18.4981	25.415
10.2688	48.5052
19.1963	25.6986
15.7244	17.7989
13.7289	29.8818
19.8527	29.9082
18.3438	32.3586
10.4772	22.5296
16.9179	30.8418
8.75393	12.3369
6.85289	32.3817
11.012	17.4944
10.2009	24.9588
8.35042	37.1258
8.93843	25.8844
10.1258	9.6086
3.92397	21.2797
8.77333	22.777
7.70753	32.5918
5.22623	28.3784
10.1634	15.0763
3.62841	17.9387
5.60543	28.25
6.65993	25.8678
6.77156	13.0186
7.314	38.7161
6.81176	12.1151
6.47761	25.8832
8.8455	25.0248
4.74695	27.8839
5.10213	19.666
6.08325	10.3188
5.91532	26.7372
3.61439	17.7179
21.7294	19.171
6.12503	13.5081
5.01962	7.22619
4.13847	25.4422
4.67442	20.1486
4.01597	24.0894
3.28901	23.3538
7.08446	3072.92
5.14367	28.3895
4.75137	15.9597
2.0119	10.027
4.30106	12.1315
2.49341	24.1934
2.16233	32.5651
2.58004	13.491
3.1747	17.9852
2.59308	13.8055
2.05381	26.6224
3.66671	28.4988
2.54789	18.5669
3.2206	16.2614
2.14154	15.0684
1.79043	18.6372
1.88953	11.5467
1.83337	24.1922
1.7708	5.59243
69.4546	26.7089
67.2442	23.2887
60.3759	11.3486
18.0286	17.1955
48.6832	23.7686
44.436	13.944
53.7659	14.9961
46.8548	8.87963
45.09	19.6345
31.5165	13.6067
53.0143	13.6551
17.3694	17.2961
29.0332	11.602
43.8864	12.6749
35.2112	15.1555
31.8336	8.76892
34.3588	9.22228
36.307	9.87701
25.458	8.27424
27.9745	2.00924
19.517	13.093
23.1432	17.5041
25.3524	8.80503
16.2919	5.94917
26.1301	11.1525
27.857	5.09106
13.6991	86.0533
18.6615	13.5205
11.2895	6.17732
23.698	6.39738
12.6208	6.73797
21.0516	3.68927
12.6876	10.0794
14.299	10.9704
11.6467	5.47623
7.56319	6.66655
8.06864	3.87014
11.9742	6.62877
12.8148	11.3835
10.9179	4.58181
14.0573	5.8161
12.9175	3.80325
6.127	3.5098
14.4309	3.13817
16.3747	9.98486
11.7106	6.86649
13.3023	4.79132
9.97743	6.00498
10.1794	2.14357
10.6253	4.41675
10.7186	8.67581
15.1998	5.25728
6.00765	4.71274
9.8117	3.36188
11.339	2.53656
8.58398	5.38123
4.34811	2.17749
5.62011	3.78217
6.4928	3.06989
4.8475	2.92561
9.73627	3.56981
6.61655	2.74263
6.60309	4.26314
7.99254	2.61284
5.33081	2.74176
5.21146	1.95214
3.16588	2.25607
4.00143	2.19114
4.05252	1.21773
3.47931	1.09072
3.93187	1.4979
3.3898	42.3313
9.29621	36.3648
3.77045	61.3738
3.15486	58.2795
2.37128	50.9696
2.99017	43.9679
1.80654	48.018
1.93974	52.7771
3.27233	39.5638
2.75742	31.6176
1.8959	45.2157
2.57613	45.3683
2.11469	43.6279
2.04358	34.8264
1.2044	41.233
1.45588	53.8133
45.7571	39.0132
23.9375	43.3881
34.826	35.3283
34.5132	46.7879
35.1662	40.4896
22.4008	42.6558
18.4277	52.0689
37.1784	45.7432
18.5742	38.9527
32.3875	38.2759
29.644	35.9469
29.8649	24.3019
24.7026	34.3195
21.2364	37.6361
32.5608	33.4422
26.6014	37.7572
15.4629	32.5684
28.2702	23.0302
26.1172	39.0516
10.9147	39.6835
12.0928	39.4002
15.2857	10.258
23.0931	21.458
13.6894	29.4632
18.2196	43.4606
19.2081	30.3237
13.4222	47.8414
80.3252	31.9826
9.7076	32.5403
8.79006	26.2167
9.98804	47.4714
18.9637	20.5265
15.1908	20.3338
6.77724	28.665
8.64578	37.6578
6.99022	35.6936
10.0794	24.3521
18.9918	23.6212
18.7129	22.5717
11.4358	17.0657
8.52772	23.3534
14.4267	17.6485
12.2211	18.5347
6.94345	36.6019
14.7075	23.9707
6.97469	20.7294
11.1941	63.9826
9.36907	15.8166
4.35195	15.5929
9.73522	23.7762
10.6309	32.9412
9.54433	14.0883
9.2034	25.6819
9.66631	27.4766
13.3022	18.2222
6.57472	19.3048
7.37545	21.7749
5.67699	24.4089
8.35565	19.4965
7.30258	30.1559
4.36093	32.3133
5.47129	19.2959
4.77451	10.1616
4.07151	31.797
3.11859	9.77412
5.111	15.1102
5.68719	21.7944
5.21184	7.80343
4.19767	25.6927
5.96911	9.6022
5.21195	8.61209
7.46788	8.93651
4.49728	13.5457
3.44014	15.1832
2.7185	6.02936
4.33406	22.0911
3.64303	22.4637
3.85839	12.9172
3.88931	10.0012
5.06384	10.4873
3.11091	7.53416
2.76671	16.6569
4.32266	16.4627
4.18598	15.7534
4.66335	10.549
2.89009	12.9422
3.26569	4.12929
2.95876	7.29892
2.6377	6.31291
2.71611	6.81713
2.07594	5.07792
3.06452	4.81791
2.82991	3.554
2.6843	5.291
2.5709	4.08009
2.59859	4.11844
2.10213	6.79073
2.81837	5.76793
1.57882	2.92271
1.35712	3.88801
54.457	2.73685
54.3466	2.53749
41.4378	3.64326
41.4844	2.79261
48.1103	2.93762
38.6227	3.01336
46.8622	1.30417
33.2351	1.94548
29.7267	1.88762
40.463	0.66026
44.6051	41.7704
44.8592	30.6741
45.4446	35.297
35.3415	37.1567
23.1697	28.4288
34.096	35.3016
23.2465	25.8918
40.2721	44.6617
30.4388	33.6468
29.219	24.4678
32.4337	31.8989
27.4901	28.2163
19.9959	25.7389
25.9502	41.1277
25.2953	24.4155
18.3865	32.1185
29.3388	21.9278
23.1928	34.9074
12.6346	18.518
23.0072	19.7616
15.6606	22.4507
92.1054	27.2253
20.6025	22.9605
8.44396	24.8697
9.87184	37.7363
11.8616	26.0791
23.3045	29.6778
6.28749	22.2409
8.42819	19.8883
7.91103	27.6381
13.3693	24.7045
10.0185	25.0668
6.58494	44.1518
13.8153	32.1927
11.3443	21.7912
9.73619	16.1382
13.7586	13.1083
20.2379	15.7799
5.76377	24.2317
8.50924	12.4521
7.84846	14.4497
7.8581	10.5138
5.96746	18.1386
6.72732	22.7863
12.8891	25.93
4.28828	18.1666
5.18166	19.4654
8.82663	28.3989
9.57772	27.795
8.70003	23.0753
14.9131	5.61022
10.9653	16.4251
8.79159	23.687
3.97646	28.8759
8.87721	19.1675
5.43246	30.562
2.67569	20.3682
6.09001	12.5513
4.01789	33.0588
8.54147	18.2448
4.89313	28.8602
4.06207	7.67854
3.45943	19.0149
5.03196	10.7657
4.07684	21.8741
3.79411	18.0716
5.50074	22.8395
7.08868	27.229
4.74708	18.634
4.86155	27.6349
4.71192	14.1249
4.11869	63.2575
4.01629	9.69963
5.27496	19.6833
3.24663	17.6256
3.80412	27.8466
5.2072	10.7108
3.91086	22.6015
5.73659	20.0022
2.95064	24.6377
3.33574	7.70604
3.53793	26.27
4.18422	11.2086
5.77703	18.4416
3.73016	19.8807
1.89339	16.2249
4.57388	11.4068
5.73708	7.17542
2.94423	24.2357
2.98719	13.0438
3.23797	8.29329
2.36397	10.8318
1.89245	13.8901
1.78275	14.2307
1.89413	18.595
2.68443	11.0339
1.80872	22.6885
1.69192	22.7603
1.30467	11.8684
1.67693	7.33326
1.87944	11.7105
1.84634	10.4908
1.27188	23.5902
1.60114	21.99
1.51971	9.05444
35.8993	20.2553
38.1608	11.5652
37.691	10.6634
21.984	26.7329
25.3705	17.4594
21.7819	14.5033
35.5066	20.5082
23.1582	10.5026
17.7234	13.2267
81.0662	18.7292
19.2591	16.3704
8.82501	12.0976
20.0491	10.0697
22.4415	13.9284
23.9488	8.43537
27.2787	17.9614
23.6476	3.37612
23.0908	4.91131
20.6464	7.14261
21.905	4.01395
15.8834	7.00341
29.3587	8.03267
19.9993	5.67732
24.7602	13.1735
8.33311	5.44342
17.1339	8.35304
14.0144	13.5449
14.1499	9.99239
21.0247	3.0802
13.3563	3.55744
11.4334	6.76129
9.16549	9.6494
9.88863	5.32128
8.81828	6.50291
11.9317	4.92949
12.0298	6.60032
18.9938	6.00548
8.57046	2.55911
15.4097	3.39308
12.268	5.32618
13.0627	6.93446
7.95213	7.23012
9.95892	7.96691
5.86209	3.68949
10.1816	2.86222
8.10898	5.35892
21.274	4.37736
12.2848	5.15468
6.36252	2.94152
16.9242	2.18278
12.2962	2.64559
7.66259	0.991377
9.81967	1.45248
5.55281	36.9674
9.78233	47.5734
10.809	59.0564
8.56053	33.6123
12.3695	38.0575
7.93599	51.2274
12.0676	31.5632
3.38984	46.3994
5.07602	37.5131
8.71433	36.22
5.9044	34.0316
6.45037	40.3535
4.99888	57.9576
7.82279	33.2984
5.96069	38.481
3.46809	30.2382
8.86983	38.8183
3.58786	49.7707
3.1684	35.1473
2.82174	29.4067
3.95493	35.5434
3.05282	19.1578
5.0753	32.0302
5.00896	34.9364
2.41287	31.0179
4.90579	33.0282
3.83925	30.9883
4.82495	30.8202
3.40104	36.1666
4.97158	30.2082
2.81712	26.0538
2.00006	32.0149
2.81585	39.0841
1.93343	20.7488
2.62891	28.1165
1.89235	24.7733
1.81558	21.2475
1.70342	24.3309
36.535	27.4987
25.1155	26.4909
26.5447	26.6872
40.8391	22.3259
16.2471	27.2439
25.7146	35.6255
18.4919	29.4961
34.6903	27.7399
30.6989	17.0862
36.2502	43.8967
14.3876	25.0126
31.7569	25.0741
21.9827	41.5796
26.4914	32.5309
24.9188	14.1997
28.6147	35.5032
30.0228	108.727
27.8487	30.6715
23.327	22.6951
23.4923	19.0358
29.5786	28.5715
13.8102	47.0923
14.088	26.2035
36.9563	19.056
16.9321	22.0625
24.806	34.1957
24.503	17.4952
12.9264	33.0933
12.2201	9.68288
7.86805	23.5882
8.4064	26.0306
13.2629	12.7099
6.06378	31.2169
10.1553	23.5696
15.7483	33.6489
11.2801	26.4057
4.52291	20.3688
6.15715	27.9826
8.46915	22.9691
15.8857	34.9853
9.55322	9.97031
3.7716	11.3495
8.88313	24.8211
5.18698	5.81463
6.30943	21.1746
7.52207	29.334
7.27057	22.5189
6.352	22.932
10.4584	14.483
6.41479	25.7311
6.81234	17.0385
6.83791	17.7272
5.86831	18.413
5.49782	18.862
4.33486	16.176
10.2346	15.7738
4.75853	17.7212
5.4176	15.6705
4.12429	8.0425
4.43832	18.2503
5.67533	9.66177
6.87263	16.1037
3.71691	14.0632
5.10658	18.7756
3.37998	14.8305
2.79655	9.25328
3.31588	6.2503
2.80898	14.6433
4.11518	18.6466
5.82491	17.5408
3.45802	20.6543
3.3947	13.0965
4.97149	18.3512
3.90282	14.9145
3.15919	9.21102
3.21825	7.22078
3.79281	17.5744
3.19563	13.0289
2.21953	5.52107
1.7214	19.9064
2.35428	9.7541
1.83711	23.1352
2.05078	8.70308
2.37197	5.01822
2.48018	14.4389
1.85154	9.32156
1.30603	6.52282
1.62915	17.5713
1.73511	7.20719
1.52213	7.63564
1.30592	5.34418
1.50794	3.76476
1.0771	9.55456
48.5961	7.5785
27.9164	9.89311
31.8382	3.40607
35.6104	15.8603
31.5513	7.51438
28.8087	4.06186
34.6368	6.87432
37.3222	9.30099
22.7209	7.10725
18.9636	4.47823
29.6486	5.47161
28.5445	5.65885
16.1455	4.97669
26.2795	2.60675
22.404	4.76739
31.2635	3.51108
25.6071	2.14284
18.6027	3.54827
11.5449	3.13031
22.8232	4.67985
24.7492	3.57277
14.6893	1.93771
19.0651	3.81484
14.4955	3.7284
22.3604	2.462
22.1162	2.57245
19.0383	2.63656
19.1691	3.74646
10.5096	2.06859
19.3548	1.28249
27.9869	2.09383
28.6114	2.45928
7.879	1.57574
8.62261	41.96
16.0556	65.6089
10.5976	31.7381
5.82089	33.4198
19.2903	32.9527
14.136	24.0968
8.27855	22.0874
8.28549	36.4941
14.9805	51.6581
17.9243	28.619
13.7171	32.9729
13.2338	46.5318
14.3981	21.2563
13.3342	25.6638
7.96888	22.8709
13.7128	26.1874
5.75995	28.0073
10.424	41.6521
10.9144	20.1669
8.10126	22.3984
6.25142	23.1136
8.15425	33.11
7.54812	33.168
5.60668	28.2759
6.76518	21.2699
15.7658	28.1137
8.83631	25.4978
7.55316	41.1172
4.3782	28.3915
7.52504	28.1103
7.723	36.4782
7.59407	18.8644
9.52962	32.7363
4.84401	20.5506
4.56426	31.9826
3.88387	23.3492
6.93536	28.5172
7.15918	25.3686
4.6469	30.5347
6.89714	31.5717
3.10596	19.7196
3.76458	26.466
3.57825	19.4889
4.30775	23.8661
2.40187	24.299
3.1267	54.2136
4.0961	17.7049
4.63432	21.506
2.39705	25.2875
1.76974	26.6176
3.71479	20.096
3.29019	12.7484
3.003	28.1709
3.04439	26.3742
2.51494	24.7473
3.61941	26.8953
2.8725	24.943
2.57551	20.8507
2.34327	20.0609
2.07809	32.8867
2.16687	19.7305
1.94346	13.9358
1.89452	28.382
1.09341	24.6179
58.0387	11.2204
57.0529	15.6244
50.7158	8.19697
48.4809	16.5875
57.3717	13.2042
59.0362	23.7613
50.6963	6.55772
53.8927	16.2837
43.7281	36.4924
49.6501	39.0757
49.0359	7.09883
46.028	17.83
26.6544	18.8348
23.264	25.6806
30.4794	14.7468
20.6529	18.0883
12.7509	25.1987
38.2617	17.6259
26.8495	14.7376
11.6334	9.19038
38.1281	9.54462
27.3652	26.2093
24.6241	18.3868
24.9387	14.9451
20.4998	11.186
19.8225	15.5173
24.7347	29.2715
13.4615	8.67553
11.9158	5.67257
13.6562	15.8653
19.4403	13.7447
4.55136	17.0404
14.9457	19.0625
17.1874	6.90856
8.23472	23.585
9.88836	19.0508
11.9047	9.48802
7.91793	15.3445
13.2862	9.35434
13.2845	7.42119
15.7611	10.4558
6.25891	12.9959
6.02119	5.56181
9.78116	5.15624
11.4941	9.04466
9.69631	16.4684
7.31878	10.2245
8.17326	12.3999
10.4409	9.35321
7.27966	9.56432
11.6967	8.01866
5.50413	12.7704
8.42981	8.30697
6.46945	9.83382
14.0413	13.0754
9.02932	12.611
8.83731	5.25527
5.88761	10.9591
5.22189	6.44503
5.72702	7.23095
4.54589	3.69666
4.29925	10.7407
6.13324	7.92557
3.43468	3.40042
4.68244	6.31801
3.67213	8.46291
5.76927	4.55017
4.70718	6.1343
4.21519	7.38395
2.63321	2.83009
3.37266	13.9266
3.00436	4.24118
4.20805	5.1832
2.96587	2.60069
5.37863	8.34629
2.42208	3.69083
5.51505	4.18898
4.31059	4.73497
3.95871	5.87482
1.97066	3.60993
2.90388	4.58672
2.8592	1.2287
1.64791	3.84992
2.36872	4.19947
2.69267	3.38903
2.59434	3.12658
1.2696	2.15555
0.862536	3.98122
1.41836	3.06468
1.09699	3.08675
40.7592	1.94562
38.1345	27.9884
33.4697	26.7941
33.975	34.5016
30.9595	30.0042
29.118	31.2841
22.4151	57.9645
34.9143	30.5145
28.198	28.2196
37.7051	23.5998
23.9975	29.2077
21.6083	28.8501
28.1869	24.3879
27.0315	41.8164
26.9552	35.9426
29.4066	32.5027
14.0518	29.8633
24.452	24.655
14.6421	28.1675
13.6173	33.5501
21.2393	35.1375
24.2409	30.5444
102.031	24.4822
13.5078	24.538
12.0281	14.1782
23.5888	29.8141
8.20432	30.2892
13.4136	32.2849
11.5249	22.8267
19.7539	29.0488
14.3089	18.1125
13.9478	24.748
17.8285	25.7598
5.83082	15.6401
7.33277	29.4643
9.15164	29.2745
13.1651	17.8399
16.7987	23.7445
6.958	19.3483
9.07338	15.97
5.67555	42.802
6.37667	10.0106
16.7604	26.1415
14.529	27.9926
12.2083	23.7745
17.2951	23.9518
12.3923	8.46744
5.42556	41.535
13.8507	20.3764
3.06856	12.0778
8.93577	9.07099
10.3358	27.788
4.6683	25.6408
5.57321	27.0149
5.06427	24.5625
4.21985	24.1507
7.57773	27.4386
8.3921	32.4308
8.07224	27.0735
3.60447	21.6181
8.39438	23.3445
7.4134	17.5194
4.3319	25.3778
7.91018	32.1493
7.15371	23.8726
2.41786	15.8542
4.29356	22.0909
4.31985	14.8897
4.43992	13.4409
3.65904	11.0808
3.00493	8.84598
4.52608	4.83688
2.94251	34.1736
3.95149	12.8347
3.66763	15.1524
2.67428	21.7907
2.81004	26.8242
2.78036	7.83032
3.89062	23.7534
4.14228	22.4845
1.89708	15.1542
2.03624	10.5938
1.49619	10.8451
1.91414	9.00762
1.56083	9.99739
1.58667	10.6268
0.831519	17.3785
NaN	12.7001
NaN	17.2918
NaN	7.34765
NaN	16.4822
NaN	12.5231
NaN	13.4665
NaN	25.9398
NaN	5.88056
NaN	153.532
NaN	12.8996
NaN	12.2785
NaN	15.745
NaN	11.9894
NaN	13.6606
NaN	8.80215
NaN	13.6009
NaN	14.2797
NaN	11.1329
NaN	7.63784
NaN	6.73465
NaN	8.47998
NaN	3.43034
NaN	4.6197
NaN	6.07087
NaN	5.27655
NaN	9.83154
NaN	6.83085
NaN	8.6425
NaN	5.27953
NaN	4.61023
NaN	7.23182
NaN	7.06094
NaN	3.05613
NaN	3.61314
NaN	7.3367
NaN	5.59637
NaN	6.14551
NaN	3.20255
NaN	3.80718
NaN	6.1905
NaN	3.37746
NaN	5.26201
NaN	6.54485
NaN	3.92098
NaN	5.28646
NaN	4.14709
NaN	5.59503
NaN	2.29119
NaN	2.48836
NaN	2.7111
NaN	2.62381
NaN	4.13543
NaN	5.96733
NaN	5.97037
NaN	3.15427
NaN	5.11342
NaN	3.86786
NaN	3.26676
NaN	3.15649
NaN	4.52909
NaN	3.02061
NaN	2.20756
NaN	2.40672
NaN	1.98689
NaN	3.10068
NaN	1.77566
NaN	1.25658
NaN	31.9455
NaN	31.1803
NaN	23.4657
NaN	33.9342
NaN	32.8736
NaN	44.3309
NaN	37.1263
NaN	36.9124
NaN	40.6615
NaN	32.647
NaN	15.3
NaN	25.641
NaN	21.2009
NaN	36.7176
NaN	52.8928
NaN	32.6969
NaN	32.0314
NaN	20.4445
NaN	36.2784
NaN	20.9634
NaN	35.242
NaN	31.2196
NaN	21.6025
NaN	22.9481
NaN	22.1283
NaN	25.9996
NaN	20.0351
NaN	16.7116
NaN	30.5775
NaN	24.8067
NaN	20.9426
NaN	29.9489
NaN	26.5147
NaN	16.4916
NaN	26.9835
NaN	30.5227
NaN	9.12288
NaN	29.526
NaN	25.0169
NaN	18.2609
NaN	23.7792
NaN	27.4035
NaN	15.6839
NaN	24.6116
NaN	22.9163
NaN	23.681
NaN	33.7087
NaN	14.8485
NaN	22.645
NaN	20.6431
NaN	14.1892
NaN	26.0305
NaN	12.6339
NaN	22.2307
NaN	15.1547
NaN	8.74893
NaN	23.1507
NaN	24.743
NaN	28.1567
NaN	12.0649
NaN	26.8774
NaN	15.0668
NaN	19.0317
NaN	25.1503
NaN	7.19268
NaN	17.0804
NaN	23.1823
NaN	22.0587
NaN	15.7983
NaN	24.6732
NaN	14.0888
NaN	16.5119
NaN	11.5185
NaN	13.616
NaN	15.1622
NaN	7.92022
NaN	17.1955
NaN	16.4046
NaN	22.0269
NaN	27.667
NaN	17.1081
NaN	30.788
NaN	12.2458
NaN	23.1275
NaN	22.7968
NaN	7.15779
NaN	11.355
NaN	14.5844
NaN	26.8895
NaN	25.6936
NaN	8.80402
NaN	9.28792
NaN	15.4267
NaN	10.3879
NaN	25.0413
NaN	15.7159
NaN	13.9102
NaN	15.543
NaN	26.5922
NaN	19.3735
NaN	7.58467
NaN	7.23698
NaN	11.9728
NaN	8.76478
NaN	11.2361
NaN	14.4933
NaN	14.0849
NaN	7.44076
NaN	8.59058
NaN	17.3845
NaN	9.42525
NaN	20.375
NaN	8.2706
NaN	8.53941
NaN	12.3352
NaN	10.9114
NaN	8.46257
NaN	6.55632
NaN	13.6525
NaN	19.2682
NaN	11.5505
NaN	11.1586
NaN	9.6936
NaN	17.2116
NaN	12.8312
NaN	4.47287
NaN	6.91466
NaN	4.16161
NaN	7.9944
NaN	7.70824
NaN	3.60629
NaN	1.58835
NaN	6.08836
NaN	4.66642
NaN	6.29567
NaN	3.61703
NaN	5.03551
NaN	6.96456
NaN	2.27039
NaN	2.08651
NaN	3.94371
NaN	3.96075
NaN	3.49973
NaN	2.46046
NaN	3.89832
NaN	2.87173
NaN	4.09181
NaN	4.55725
NaN	4.26107
NaN	5.59474
NaN	3.11653
NaN	2.84877
NaN	3.6146
NaN	1.49796
NaN	2.12338
NaN	2.27202
NaN	2.19046
NaN	1.55531
NaN	1.74079
NaN	1.65554
NaN	0.948288
NaN	0
NaN	41.8535
NaN	70.2185
NaN	48.5254
NaN	38.3618
NaN	55.0387
NaN	46.3606
NaN	52.2969
NaN	50.2139
NaN	44.2995
NaN	42.0744
NaN	42.1795
NaN	38.9724
NaN	41.147
NaN	37.4131
NaN	43.7949
NaN	49.9428
NaN	24.4311
NaN	38.8585
NaN	41.5861
NaN	36.627
NaN	35.9425
NaN	32.1449
NaN	48.3138
NaN	49.6098
NaN	29.1323
NaN	46.2672
NaN	10.3056
NaN	26.0457
NaN	20.6233
NaN	38.258
NaN	34.0326
NaN	41.1314
NaN	31.5476
NaN	27.3223
NaN	26.1917
NaN	24.2541
NaN	30.0902
NaN	41.0084
NaN	38.9901
NaN	32.896
NaN	25.8648
NaN	21.2436
NaN	33.0683
NaN	28.447
NaN	39.0262
NaN	35.3537
NaN	18.3836
NaN	29.5584
NaN	33.0799
NaN	30.1223
NaN	23.9814
NaN	25.3503
NaN	33.3741
NaN	25.6673
NaN	25.3337
NaN	17.3286
NaN	20.8383
NaN	6.08073
NaN	26.6059
NaN	21.6383
NaN	21.565
NaN	13.1652
NaN	26.1376
NaN	36.7234
NaN	28.3125
NaN	21.0586
NaN	15.6069
NaN	53.9731
NaN	30.6445
NaN	18.3046
NaN	19.352
NaN	13.9169
NaN	22.5076
NaN	13.6252
NaN	26.5097
NaN	14.4741
NaN	24.0757
NaN	12.8894
NaN	17.3356
NaN	21.862
NaN	24.384
NaN	18.6295
NaN	22.7898
NaN	22.1108
NaN	26.5994
NaN	12.5185
NaN	10.3137
NaN	14.912
NaN	8.55231
NaN	10.6751
NaN	10.0611
NaN	27.4009
NaN	14.5039
NaN	15.3847
NaN	8.76353
NaN	27.0922
NaN	13.3993
NaN	12.4486
NaN	8.3733
NaN	4.95038
NaN	15.3443
NaN	6.65302
NaN	15.7875
NaN	13.9577
NaN	5.59707
NaN	6.82962
NaN	7.0604
NaN	11.5839
NaN	8.28661
NaN	4.26409
NaN	7.82085
NaN	5.55175
NaN	6.01367
NaN	4.81335
NaN	5.81798
NaN	5.49531
NaN	3.43976
NaN	5.78803
NaN	2.7508
NaN	3.01612
NaN	2.69794
NaN	4.58001
NaN	2.46703
NaN	4.52421
NaN	2.594
NaN	3.37837
NaN	2.47372
NaN	2.75034
NaN	2.13584
NaN	3.80814
NaN	2.35076
NaN	1.33631
NaN	2.39939
NaN	2.03478
NaN	1.00801
NaN	30.3138
NaN	27.0315
NaN	35.8805
NaN	25.2034
NaN	24.1746
NaN	30.2743
NaN	26.052
NaN	33.5436
NaN	29.3423
NaN	24.3027
NaN	33.1218
NaN	33.0277
NaN	26.4562
NaN	26.152
NaN	34.6858
NaN	33.6356
NaN	42.8749
NaN	28.7758
NaN	37.8183
NaN	30.681
NaN	30.2097
NaN	21.4737
NaN	31.9623
NaN	15.4407
NaN	29.057
NaN	18.8455
NaN	25.1416
NaN	24.6689
NaN	26.3594
NaN	23.873
NaN	16.3361
NaN	30.6165
NaN	30.3601
NaN	24.6366
NaN	32.4721
NaN	23.9798
NaN	22.8352
NaN	8.3399
NaN	22.3136
NaN	28.2736
NaN	29.4397
NaN	24.0774
NaN	27.1442
NaN	20.2438
NaN	32.2975
NaN	12.6013
NaN	17.7191
NaN	25.1592
NaN	16.997
NaN	22.2252
NaN	23.5849
NaN	9.37041
NaN	19.1617
NaN	25.6662
NaN	8.11492
NaN	18.4352
NaN	29.0904
NaN	24.2594
NaN	17.1973
NaN	41.538
NaN	16.4785
NaN	28.4946
NaN	19.5675
NaN	18.3072
NaN	34.5401
NaN	24.8486
NaN	23.1604
NaN	35.2089
NaN	4.79846
NaN	12.4913
NaN	25.3034
NaN	18.1814
NaN	7.67056
NaN	21.0695
NaN	17.1219
NaN	10.2578
NaN	8.03789
NaN	22.6322
NaN	16.6598
NaN	19.4198
NaN	16.0963
NaN	13.3828
NaN	9.3969
NaN	10.0204
NaN	12.4667
NaN	5.87197
NaN	27.5034
NaN	18.9299
NaN	15.6376
NaN	18.8251
NaN	12.0286
NaN	15.1906
NaN	12.8005
NaN	9.36471
NaN	14.8407
NaN	23.0043
NaN	18.4653
NaN	10.5384
NaN	5.51874
NaN	11.7542
NaN	12.58
NaN	11.7203
NaN	9.82505
NaN	14.0496
NaN	12.7496
NaN	9.38586
NaN	8.52867
NaN	9.98978
NaN	19.9389
NaN	16.7086
NaN	9.53873
NaN	7.66218
NaN	9.51817
NaN	6.71781
NaN	12.3905
NaN	7.88094
NaN	8.18383
NaN	5.17413
NaN	6.63463
NaN	8.77539
NaN	5.81853
NaN	4.69348
NaN	3.85043
NaN	7.33615
NaN	7.12622
NaN	3.52483
NaN	5.59734
NaN	3.86601
NaN	3.51562
NaN	6.41372
NaN	3.92988
NaN	4.42221
NaN	6.67682
NaN	6.78897
NaN	3.68259
NaN	1.77554
NaN	4.75165
NaN	3.39385
NaN	2.58914
NaN	3.15718
NaN	3.48749
NaN	3.79917
NaN	1.51839
NaN	1.91856
NaN	3.02603
NaN	2.26293
NaN	1.75044
NaN	2.29601
NaN	2.65263
NaN	2.53243
NaN	3.31513
NaN	2.79499

## Sheet: panel c
Radial distance for Uncorrected (x)	Pairwise correlation for Uncorrected (y)	Linear regression fit of data (x) for Uncorrected	Linear regression fit of data (y) for Uncorrected	Lower 95% confidence interval for Uncorrected (y)	Upper 95% confidence interval for Uncorrected (y)		Radial distance for Corrected (x)	Pairwise correlation for Corrected (y)	Linear regression fit of data (x) for Corrected	Linear regression fit of data (y) for Corrected	Lower 95% confidence interval for Corrected (y)	Upper 95% confidence interval for Corrected (y)
16.5005	0.314553	8.80448	0.0875684	0.0579743	0.117163		102.382	-0.0559611	8.34421	0.100167	0.0774749	0.122859
33.7892	0.211493	12.1008	0.0881602	0.0597486	0.116572		82.1386	0.1015	8.72327	0.10011	0.0774895	0.122731
31.2015	0.0305683	15.032	0.0886864	0.0613193	0.116054		89.9752	0.165564	12.883	0.0994849	0.0776469	0.121323
44.201	-0.0264374	16.1293	0.0888834	0.0619054	0.115861		85.4295	0.108539	13.2617	0.099428	0.0776609	0.121195
46.0249	0.0466592	16.5005	0.0889501	0.0621035	0.115797		124.77	0.144037	16.299	0.0989715	0.0777718	0.120171
78.333	0.0309065	19.8009	0.0895426	0.0638585	0.115227		58.9592	0.0543909	20.8319	0.0982902	0.0779308	0.11865
52.4071	-0.0726308	23.0985	0.0901346	0.0656006	0.114669		103.419	0.0411189	20.8396	0.0982891	0.0779311	0.118647
81.052	0.208115	23.8471	0.090269	0.0659944	0.114544		100.422	-0.0206941	20.8461	0.0982881	0.0779313	0.118645
88.3537	0.149975	24.5619	0.0903974	0.0663697	0.114425		89.5197	0.165296	23.536	0.0978838	0.0780217	0.117746
83.9063	0.225158	24.5629	0.0903976	0.0663702	0.114425		132.919	0.156381	25.8129	0.0975416	0.0780956	0.116988
70.4579	0.235319	25.6654	0.0905955	0.0669478	0.114243		69.8102	-0.0967115	28.8463	0.0970857	0.0781903	0.115981
85.9566	-0.0527911	27.4997	0.0909248	0.0679051	0.113944		113.471	0.0897396	29.5917	0.0969737	0.0782128	0.115735
70.4172	-0.0978739	27.4997	0.0909248	0.0679051	0.113944		115.013	0.132607	29.6445	0.0969658	0.0782144	0.115717
57.7425	0.135272	27.8672	0.0909908	0.0680964	0.113885		125.184	0.100546	31.173	0.096736	0.0782597	0.115212
35.2423	0.0937664	28.2352	0.0910569	0.0682876	0.113826		122.975	0.14594	31.8934	0.0966278	0.0782805	0.114975
90.3809	0.178416	29.7143	0.0913224	0.0690544	0.11359		155.189	-0.103614	32.7145	0.0965043	0.078304	0.114705
63.8376	0.0687431	30.0766	0.0913874	0.0692417	0.113533		86.6851	0.219598	33.0774	0.0964498	0.0783142	0.114585
8.80448	0.132582	31.1801	0.0915856	0.0698108	0.11336		33.4981	0.193905	33.4981	0.0963866	0.078326	0.114447
85.9403	0.113187	31.1824	0.091586	0.069812	0.11336		103.509	0.0623081	33.8188	0.0963384	0.0783349	0.114342
80.7187	-0.0358147	31.1859	0.0915866	0.0698138	0.113359		8.72327	0.129367	34.2184	0.0962783	0.0783459	0.114211
91.5596	0.114621	31.2015	0.0915894	0.0698218	0.113357		124.13	0.094194	34.6225	0.0962176	0.0783569	0.114078
78.6671	0.101971	31.5486	0.0916517	0.0700004	0.113303		93.398	0.0111685	35.0139	0.0961587	0.0783675	0.11395
92.8861	0.149137	31.5822	0.0916578	0.0700177	0.113298		108.936	0.0642392	36.1455	0.0959887	0.0783975	0.11358
80.6623	0.190286	32.2861	0.0917841	0.0703791	0.113189		78.644	0.00840204	36.1721	0.0959847	0.0783982	0.113571
51.6791	-0.00813511	32.2879	0.0917845	0.07038	0.113189		92.3552	0.123423	36.9587	0.0958665	0.0784186	0.113314
91.1842	0.179494	32.2993	0.0917865	0.0703859	0.113187		114.703	-0.00309834	36.97	0.0958648	0.0784189	0.113311
92.0156	-0.0200163	33.3944	0.0919831	0.0709463	0.11302		124.024	0.107628	38.1112	0.0956932	0.0784477	0.112939
106.194	-0.0339977	33.7892	0.092054	0.0711479	0.11296		102.997	0.0924095	38.1583	0.0956862	0.0784489	0.112923
92.4327	0.135249	35.2423	0.0923149	0.0718869	0.112743		190.892	-0.0128705	39.3381	0.0955088	0.0784777	0.11254
104.03	0.19734	35.2519	0.0923166	0.0718918	0.112741		127.88	0.117935	39.6719	0.0954587	0.0784857	0.112432
91.9722	0.108861	35.2555	0.0923172	0.0718936	0.112741		95.1125	0.105829	39.7073	0.0954534	0.0784865	0.11242
88.3537	0.02982	35.6319	0.0923848	0.0720843	0.112685		28.8463	0.188849	40.068	0.0953991	0.0784951	0.112303
92.8676	-0.0293255	36.3605	0.0925156	0.0724526	0.112579		31.173	0.0183436	40.8107	0.0952875	0.0785123	0.112063
98.9885	0.215021	36.7568	0.0925868	0.0726525	0.112521		115.049	-0.0211113	40.8194	0.0952862	0.0785125	0.11206
82.2587	0.162691	36.7632	0.0925879	0.0726557	0.11252		103.509	0.228554	42.3886	0.0950504	0.0785476	0.111553
83.4694	0.139748	37.0903	0.0926467	0.0728204	0.112473		85.9368	-0.0960379	43.2692	0.094918	0.0785664	0.11127
103.209	0.104467	37.109	0.09265	0.0728298	0.11247		79.8785	0.168937	43.9878	0.09481	0.0785814	0.111039
130.345	0.102322	37.4649	0.0927139	0.0730087	0.112419		88.1928	0.0207141	44.7604	0.0946939	0.0785969	0.110791
101.102	0.138372	37.4776	0.0927162	0.0730151	0.112417		66.8916	0.174619	45.1525	0.094635	0.0786046	0.110665
103.197	0.0376049	37.8329	0.09278	0.0731934	0.112367		65.241	0.158328	46.4058	0.0944466	0.0786284	0.110265
99.8118	0.0218889	37.8554	0.092784	0.0732046	0.112363		105.017	0.152497	46.7263	0.0943984	0.0786342	0.110163
105.761	0.095296	38.2239	0.0928502	0.0733892	0.112311		77.7823	0.0203589	48.3922	0.0941481	0.0786631	0.109633
114.737	0.107918	38.6092	0.0929193	0.0735819	0.112257		130.635	-0.000321335	48.7843	0.0940891	0.0786695	0.109509
117.776	0.188671	39.7044	0.093116	0.0741275	0.112104		119.328	0.0414592	48.8192	0.0940839	0.0786701	0.109498
107.448	0.014483	39.7148	0.0931178	0.0741326	0.112103		43.2692	-0.0470591	49.193	0.0940277	0.0786761	0.109379
113.039	0.114502	41.1799	0.0933809	0.0748576	0.111904		59.7873	0.00592384	49.5465	0.0939746	0.0786816	0.109268
120.934	0.164324	42.2894	0.0935801	0.0754026	0.111758		51.1792	0.0572114	49.9796	0.0939095	0.0786882	0.109131
124.876	0.0539035	42.2926	0.0935806	0.0754041	0.111757		70.3145	0.179959	50.0137	0.0939043	0.0786887	0.10912
119.583	0.021283	43.4095	0.0937812	0.0759491	0.111613		65.5504	0.125499	50.7839	0.0937886	0.0787	0.108877
104.041	0.0230533	43.7862	0.0938488	0.076132	0.111566		32.7145	-0.0532284	51.1792	0.0937292	0.0787055	0.108753
56.623	0.0495512	44.201	0.0939233	0.0763329	0.111514		92.8409	0.0811839	52.4556	0.0935373	0.0787223	0.108352
70.0337	0.072907	44.9078	0.0940502	0.076674	0.111426		16.299	0.30197	53.5608	0.0933712	0.0787354	0.108007
87.4819	0.182215	44.9575	0.0940591	0.0766979	0.11142		169.107	0.0325074	53.6622	0.093356	0.0787365	0.107975
70.0245	0.000395797	45.2924	0.0941192	0.0768589	0.11138		107.954	0.0948249	54.0803	0.0932932	0.0787411	0.107845
67.7411	0.149526	46.0249	0.0942507	0.0772096	0.111292		55.67	0.100611	54.4047	0.0932444	0.0787445	0.107744
71.982	0.0612537	47.1804	0.0944582	0.0777588	0.111157		190.136	0.067353	54.4553	0.0932368	0.078745	0.107729
93.1984	0.10604	47.5182	0.0945188	0.0779185	0.111119		185.221	0.145689	54.4764	0.0932336	0.0787452	0.107722
96.4965	0.229326	47.893	0.0945861	0.0780951	0.111077		103.903	0.126604	54.7712	0.0931893	0.0787482	0.10763
86.3365	0.110355	47.8991	0.0945872	0.0780979	0.111076		188.708	0.113601	55.1767	0.0931284	0.0787521	0.107505
87.8997	0.0959725	48.6819	0.0947277	0.0784649	0.110991		147.907	0.0875735	55.3164	0.0931074	0.0787534	0.107461
111.389	0.173865	49.0703	0.0947975	0.0786461	0.110949		150.34	0.0634109	55.67	0.0930542	0.0787565	0.107352
101.482	0.775602	49.4196	0.0948602	0.0788085	0.110912		127.932	0.0502846	56.1112	0.0929879	0.0787603	0.107216
122.224	0.00899198	49.7711	0.0949233	0.0789714	0.110875		67.2746	0.0489436	56.8227	0.092881	0.0787659	0.106996
109.627	0.0189351	49.8061	0.0949296	0.0789876	0.110872		169.244	0.0875094	57.2202	0.0928212	0.0787687	0.106874
65.0049	0.713304	50.1563	0.0949924	0.0791493	0.110836		175.148	-0.0586543	58.0695	0.0926936	0.0787741	0.106613
91.1726	-0.00110178	50.1607	0.0949932	0.0791513	0.110835		94.3476	0.0421539	58.6052	0.0926131	0.078777	0.106449
105.382	-0.00926906	50.5672	0.0950662	0.0793383	0.110794		184.54	0.172355	58.8941	0.0925697	0.0787784	0.106361
37.8329	0.131749	51.6791	0.0952658	0.0798459	0.110686		162.162	0.0353123	58.9592	0.0925599	0.0787787	0.106341
42.2926	-0.0111261	51.6791	0.0952658	0.0798459	0.110686		154.081	0.058503	59.7104	0.092447	0.0787818	0.106112
47.8991	-0.0318796	52.4071	0.0953965	0.0801751	0.110618		86.2225	0.190173	59.7873	0.0924354	0.078782	0.106089
63.1179	0.33438	52.468	0.0954075	0.0802025	0.110612		20.8461	0.0327913	60.1202	0.0923854	0.0787831	0.105988
59.2483	0.124533	52.7972	0.0954666	0.0803503	0.110583		33.0774	0.0431962	61.4737	0.092182	0.0787859	0.105578
32.2879	0.189058	52.8514	0.0954763	0.0803746	0.110578		146.218	0.00552627	62.2299	0.0920683	0.0787863	0.10535
37.4649	-0.0136796	53.5714	0.0956056	0.0806959	0.110515		173.106	0.0637051	62.2299	0.0920683	0.0787863	0.10535
63.4788	0.161424	53.9183	0.0956679	0.0808497	0.110486		68.5476	0.0690728	62.2857	0.0920599	0.0787863	0.105334
63.4788	0.270869	53.9714	0.0956774	0.0808731	0.110482		151.575	0.0084935	62.7158	0.0919953	0.0787861	0.105204
49.0703	-0.00398662	53.9816	0.0956792	0.0808776	0.110481		126.34	-0.0389312	62.7409	0.0919915	0.078786	0.105197
57.7117	0.0626368	54.7198	0.0958118	0.0812025	0.110421		183.165	0.19421	63.4407	0.0918863	0.0787851	0.104988
23.8471	-0.0274117	55.4345	0.0959401	0.081514	0.110366		83.0701	0.119248	63.4407	0.0918863	0.0787851	0.104988
68.5412	0.0348503	55.5101	0.0959536	0.0815468	0.11036		193.728	0.087401	64.0149	0.0918	0.0787837	0.104816
57.3371	0.0851301	55.873	0.0960188	0.0817037	0.110334		188.021	0.116009	65.241	0.0916158	0.0787791	0.104452
47.1804	0.0969623	56.1932	0.0960763	0.0818414	0.110311		170.549	0.0755993	65.5504	0.0915693	0.0787775	0.104361
56.1932	0.115938	56.2585	0.096088	0.0818694	0.110307		75.5877	-0.0479898	65.5781	0.0915651	0.0787774	0.104353
53.9714	0.141865	56.623	0.0961534	0.0820253	0.110282		42.3886	-0.0109367	65.7047	0.0915461	0.0787767	0.104315
58.4855	-0.0148586	56.951	0.0962123	0.0821649	0.11026		95.7245	0.227829	65.971	0.091506	0.0787751	0.104237
76.3483	0.0301033	56.9629	0.0962145	0.0821699	0.110259		23.536	-0.0275188	66.8916	0.0913677	0.0787688	0.103967
79.1141	0.092351	57.0194	0.0962246	0.0821939	0.110255		33.8188	0.22222	67.2407	0.0913152	0.0787661	0.103864
62.3222	0.234966	57.3371	0.0962816	0.0823283	0.110235		147.315	0.145214	67.2746	0.0913101	0.0787658	0.103854
89.1138	0.00297255	57.7117	0.0963489	0.0824859	0.110212		67.2407	0.202826	67.6748	0.09125	0.0787623	0.103738
45.2924	0.20133	57.7121	0.096349	0.0824861	0.110212		62.2299	0.220057	67.724	0.0912426	0.0787619	0.103723
39.7044	0.106082	57.7425	0.0963544	0.0824989	0.11021		135.673	0.211607	67.724	0.0912426	0.0787619	0.103723
117.88	0.0689172	58.4855	0.0964878	0.0828085	0.110167		145.643	-0.00308927	68.127	0.091182	0.0787581	0.103606
71.9782	0.468106	58.9198	0.0965658	0.0829878	0.110144		89.9306	0.0389239	68.5476	0.0911188	0.0787537	0.103484
70.8037	0.197685	59.2483	0.0966248	0.0831225	0.110127		159.558	-0.062836	69.0156	0.0910484	0.0787486	0.103348
75.1995	0.0896433	60.4185	0.0968348	0.083596	0.110074		127.841	0.048227	69.4771	0.0909791	0.0787431	0.103215
91.1974	-0.0945868	60.7722	0.0968984	0.0837371	0.11006		165.368	0.167238	69.8102	0.090929	0.0787388	0.103119
93.2874	0.137771	60.7892	0.0969014	0.0837438	0.110059		135.662	0.0996778	69.8739	0.0909194	0.078738	0.103101
89.5238	0.0282347	61.5301	0.0970344	0.0840361	0.110033		117.631	0.189518	69.8952	0.0909162	0.0787377	0.103095
97.3147	0.275514	61.5379	0.0970358	0.0840391	0.110033		62.7158	0.305992	70.3145	0.0908532	0.078732	0.102974
95.6589	-0.00801877	61.5484	0.0970377	0.0840432	0.110032		46.4058	0.122355	70.3915	0.0908416	0.0787309	0.102952
104.067	0.0432808	61.9139	0.0971033	0.0841857	0.110021		43.9878	0.020086	70.6705	0.0907997	0.0787269	0.102873
50.1607	0.0783307	62.301	0.0971728	0.0843354	0.11001		54.0803	0.176093	71.0992	0.0907353	0.0787204	0.10275
35.2519	0.132851	62.3222	0.0971766	0.0843436	0.11001		39.6719	0.0889551	71.5512	0.0906674	0.0787131	0.102622
113.498	0.0152234	62.3493	0.0971815	0.0843541	0.110009		58.0695	-0.0127956	71.6734	0.090649	0.0787111	0.102587
96.1845	0.0459223	62.7282	0.0972495	0.0844992	0.11		53.6622	0.196706	72.0048	0.0905992	0.0787054	0.102493
100.237	0.138894	62.7507	0.0972536	0.0845078	0.109999		147.351	0.0704619	72.3954	0.0905405	0.0786985	0.102382
105.362	0.180299	63.1179	0.0973195	0.0846473	0.109992		126.835	0.0939818	72.4662	0.0905298	0.0786972	0.102363
99.8528	0.101006	63.1416	0.0973237	0.0846562	0.109991		139.165	0.0748158	72.8907	0.090466	0.0786892	0.102243
91.9805	0.0268322	63.4788	0.0973843	0.0847832	0.109985		71.0992	0.136879	72.9353	0.0904593	0.0786883	0.10223
101.069	0.117505	63.4788	0.0973843	0.0847832	0.109985		148.526	0.155242	73.3002	0.0904045	0.0786811	0.102128
68.8647	0.10509	63.8376	0.0974487	0.0849172	0.10998		143.892	0.0212506	73.3839	0.0903919	0.0786794	0.102104
63.4788	0.0975751	63.8771	0.0974558	0.0849318	0.10998		180.435	0.197429	73.7289	0.0903401	0.0786722	0.102008
83.9063	0.304933	64.2177	0.0975169	0.0850578	0.109976		185.894	0.206031	74.2862	0.0902563	0.07866	0.101853
96.1057	0.179415	64.2243	0.0975181	0.0850603	0.109976		152.125	0.0416799	74.618	0.0902064	0.0786525	0.10176
106.627	0.159445	64.2287	0.0975189	0.0850619	0.109976		130.113	0.100333	75.56	0.0900649	0.0786296	0.1015
61.9139	0.134016	64.6582	0.097596	0.0852192	0.109973		143.285	0.0488993	75.5877	0.0900607	0.0786289	0.101492
102.761	0.323359	65.0049	0.0976583	0.085345	0.109972		100.972	0.177623	75.6186	0.090056	0.0786282	0.101484
94.4201	0.211977	65.0385	0.0976643	0.0853571	0.109972		97.0275	0.00263486	76.0137	0.0899967	0.0786179	0.101375
115.631	-0.0235436	65.3877	0.097727	0.0854825	0.109972		113.504	-0.057165	77.7106	0.0897416	0.0785696	0.100914
100.309	-0.0481983	65.4193	0.0977327	0.0854937	0.109972		108.551	0.0806899	77.7823	0.0897308	0.0785674	0.100894
118.223	0.142142	65.771	0.0977958	0.0856187	0.109973		115.702	0.137238	78.1163	0.0896807	0.078557	0.100804
100.232	0.134272	65.7767	0.0977968	0.0856208	0.109973		143.251	0.0908994	78.5988	0.0896081	0.0785414	0.100675
99.841	0.00548293	66.2281	0.0978779	0.0857794	0.109976		145.071	0.166255	78.644	0.0896013	0.0785399	0.100663
109.189	0.26243	66.5324	0.0979325	0.0858851	0.10998		67.6748	0.158195	79.0186	0.089545	0.0785274	0.100563
124.411	0.0327391	66.5358	0.0979331	0.0858863	0.10998		74.2862	0.0974273	79.1321	0.089528	0.0785235	0.100532
114.386	0.0538049	66.5566	0.0979368	0.0858935	0.10998		118.154	0.15637	79.8785	0.0894158	0.0784972	0.100334
109.99	0.173983	66.5646	0.0979383	0.0858963	0.10998		138.52	0.105609	79.9967	0.089398	0.0784929	0.100303
118.677	0.0426565	66.5738	0.0979399	0.0858995	0.10998		122.41	-0.0391551	80.0262	0.0893936	0.0784918	0.100295
117.789	0.110493	66.9213	0.0980023	0.0860189	0.109986		147.315	0.108246	80.8439	0.0892707	0.0784609	0.10008
129.922	0.17981	66.9335	0.0980045	0.0860231	0.109986		103.903	0.0308449	81.3046	0.0892015	0.0784427	0.0999602
66.9335	0.0417086	66.9561	0.0980086	0.0860308	0.109986		140.254	0.193663	81.6731	0.0891461	0.0784277	0.0998644
117.841	0.06823	67.3308	0.0980758	0.0861581	0.109994		146.831	0.26247	81.7235	0.0891385	0.0784256	0.0998514
107.448	0.0484005	67.7411	0.0981495	0.0862959	0.110003		91.7957	-0.00756921	82.1386	0.0890761	0.0784082	0.099744
36.7632	0.116851	67.7411	0.0981495	0.0862959	0.110003		131.255	0.0690831	82.6094	0.0890054	0.0783879	0.0996229
50.1563	0.125537	67.7523	0.0981515	0.0862996	0.110003		91.9624	0.182439	83.0701	0.0889361	0.0783673	0.0995049
62.3493	0.149023	68.099	0.0982138	0.0864146	0.110013		147.99	0.264102	83.1658	0.0889217	0.0783629	0.0994805
71.2196	-0.0766945	68.4744	0.0982812	0.0865376	0.110025		155.826	0.115512	83.6049	0.0888557	0.0783426	0.0993688
74.3977	0.0705857	68.4983	0.0982854	0.0865453	0.110026		49.5465	0.124112	85.338	0.0885953	0.0782567	0.0989338
38.6092	0.233764	68.5412	0.0982932	0.0865593	0.110027		56.8227	0.0830386	85.3767	0.0885894	0.0782547	0.0989242
55.4345	-0.0341438	68.8647	0.0983512	0.0866638	0.110039		36.1455	-0.0113856	85.4295	0.0885815	0.0782519	0.0989111
37.109	-0.0471524	69.6422	0.0984908	0.0869102	0.110071		115.603	-0.0291446	85.7671	0.0885308	0.078234	0.0988276
65.3877	0.0807806	69.7152	0.0985039	0.086933	0.110075		101.066	0.121127	85.9368	0.0885053	0.0782248	0.0987857
74.353	0.306061	70.0245	0.0985595	0.0870289	0.11009		61.4737	0.226163	86.2225	0.0884623	0.0782092	0.0987155
36.3605	0.148555	70.0337	0.0985611	0.0870317	0.110091		62.2299	0.095989	86.3186	0.0884479	0.0782039	0.0986919
94.0486	0.0710425	70.0539	0.0985647	0.0870379	0.110092		157.72	0.0975466	86.6851	0.0883928	0.0781833	0.0986023
88.6949	0.255202	70.0735	0.0985682	0.087044	0.110093		117.64	0.113293	86.694	0.0883915	0.0781828	0.0986001
94.9001	-0.0145175	70.4172	0.09863	0.087149	0.110111		54.4047	0.0707634	86.7226	0.0883872	0.0781812	0.0985931
89.1009	0.224805	70.4579	0.0986373	0.0871613	0.110113		121.877	0.0791408	87.2681	0.0883052	0.0781497	0.0984606
95.7112	0.190158	70.8037	0.0986994	0.0872655	0.110133		78.1163	-0.0123449	88.1928	0.0881662	0.0780941	0.0982383
78.6727	0.179519	70.8428	0.0987064	0.0872771	0.110136		112.441	0.133767	88.2255	0.0881613	0.078092	0.0982305
94.4201	0.114724	70.8925	0.0987153	0.087292	0.110139		171.118	0.0653093	88.6414	0.0880988	0.078066	0.0981315
105.403	-0.049881	71.2196	0.098774	0.0873888	0.110159		55.3164	0.18882	89.0109	0.0880432	0.0780424	0.0980441
88.6997	0.0836695	71.2283	0.0987756	0.0873914	0.11016		48.8192	0.00273242	89.1909	0.0880162	0.0780307	0.0980017
108.261	0.00800932	71.5842	0.0988395	0.0874952	0.110184		125.776	0.104544	89.5197	0.0879668	0.078009	0.0979245
84.6781	0.0682057	71.5936	0.0988412	0.087498	0.110184		39.3381	0.0245973	89.5437	0.0879632	0.0780075	0.0979189
44.9575	0.0901178	71.6144	0.0988449	0.087504	0.110186		36.1721	-0.0251618	89.9195	0.0879067	0.0779822	0.0978311
56.951	0.125999	71.6596	0.098853	0.087517	0.110189		139.165	0.0753613	89.9306	0.087905	0.0779815	0.0978286
33.3944	0.380091	71.6741	0.0988556	0.0875212	0.11019		131.162	0.170599	89.9752	0.0878983	0.0779784	0.0978182
87.1452	0.102259	71.9782	0.0989102	0.0876084	0.110212		38.1583	0.199463	89.9974	0.087895	0.0779769	0.097813
106.611	0.399083	71.982	0.0989109	0.0876095	0.110212		95.1066	0.132456	90.0531	0.0878866	0.0779731	0.0978001
109.144	0.199949	71.9871	0.0989118	0.087611	0.110213		54.7712	-0.0420046	91.7957	0.0876247	0.0778485	0.0974009
114.386	0.155275	72.0099	0.0989159	0.0876174	0.110214		121.358	-0.031633	91.9624	0.0875996	0.077836	0.0973633
100.677	0.197316	72.0314	0.0989198	0.0876236	0.110216		163.321	0.17008	92.3552	0.0875406	0.0778061	0.0972751
102.435	0.20269	72.3755	0.0989815	0.0877206	0.110242		143.935	0.149423	92.4523	0.087526	0.0777986	0.0972534
99.4419	0.180018	72.776	0.0990534	0.0878318	0.110275		175.836	0.0965794	92.8409	0.0874676	0.0777683	0.0971669
89.566	0.509901	73.149	0.0991204	0.0879335	0.110307		102.012	0.19848	93.2537	0.0874056	0.0777355	0.0970757
119.136	0.0554723	73.9352	0.0992616	0.088142	0.110381		180.408	0.241644	93.2749	0.0874024	0.0777338	0.097071
104.913	0.186577	73.9979	0.0992728	0.0881583	0.110387		169.918	0.0968747	93.398	0.0873839	0.0777238	0.0970439
108.692	0.121382	74.353	0.0993366	0.0882496	0.110424		171.762	0.128344	94.1707	0.0872677	0.0776602	0.0968753
109.172	0.0985341	74.3977	0.0993446	0.088261	0.110428		108.377	-0.0137838	94.1843	0.0872657	0.077659	0.0968724
90.7962	0.085108	74.4121	0.0993472	0.0882647	0.11043		190.892	0.034566	94.3476	0.0872412	0.0776453	0.0968371
105.275	0.0735018	75.1157	0.0994735	0.0884402	0.110507		168.509	0.0119697	95.1066	0.0871271	0.0775799	0.0966743
105.778	0.0346124	75.1489	0.0994795	0.0884483	0.110511		137.39	0.00598708	95.1125	0.0871262	0.0775793	0.096673
107.838	-0.0271062	75.1995	0.0994885	0.0884607	0.110516		93.2749	0.105065	95.7245	0.0870342	0.0775249	0.0965435
121.841	0.00935134	75.9127	0.0996166	0.0886312	0.110602		85.7671	0.225524	96.1097	0.0869763	0.0774899	0.0964628
79.0774	0.116773	76.3483	0.0996948	0.0887319	0.110658		79.1321	0.202885	96.2584	0.086954	0.0774762	0.0964318
144.244	0.100938	76.7495	0.0997668	0.0888225	0.110711		158.967	0.0262884	97.0275	0.0868384	0.0774039	0.0962729
159.181	0.01036	76.7632	0.0997693	0.0888255	0.110713		176.527	-0.0553785	97.1476	0.0868203	0.0773924	0.0962483
35.6319	0.124566	77.5075	0.0999029	0.0889877	0.110818		159.533	0.147792	97.6139	0.0867502	0.0773471	0.0961534
48.6819	-0.00091525	77.9184	0.0999767	0.0890739	0.110879		165.99	0.0854894	98.4788	0.0866203	0.0772607	0.0959798
49.7711	-1.21451e-05	78.3093	0.100047	0.0891539	0.11094		38.1112	0.456106	98.5804	0.086605	0.0772504	0.0959596
52.7972	-0.0450871	78.333	0.100051	0.0891586	0.110944		69.8952	0.139009	99.4607	0.0864727	0.0771587	0.0957866
71.6596	0.0292558	78.6671	0.100111	0.0892252	0.110997		60.1202	0.261575	99.4976	0.0864671	0.0771548	0.0957794
44.9078	0.119699	78.6727	0.100112	0.0892263	0.110998		135.705	0.0569816	99.5838	0.0864542	0.0771457	0.0957627
31.1859	0.0348758	79.0774	0.100185	0.0893048	0.111065		120.468	0.0011408	99.9733	0.0863956	0.0771038	0.0956874
24.5619	0.118458	79.1141	0.100191	0.0893118	0.111071		160.799	0.0860576	99.996	0.0863922	0.0771014	0.0956831
66.5738	0.0796685	79.4857	0.100258	0.0893818	0.111134		45.1525	0.253229	100.422	0.0863282	0.0770548	0.0956016
68.4744	0.178904	79.5177	0.100264	0.0893877	0.11114		73.3002	0.310967	100.972	0.0862455	0.0769935	0.0954974
63.8771	0.0798459	79.546	0.100269	0.0893929	0.111145		135.664	0.0271726	101.066	0.0862314	0.0769829	0.0954799
79.546	0.082051	79.8792	0.100329	0.0894537	0.111204		113.089	0.146596	101.575	0.0861548	0.0769248	0.0953849
61.5484	0.160504	80.2668	0.100398	0.0895226	0.111274		124.13	-0.0208172	101.93	0.0861016	0.0768836	0.0953195
28.2352	0.190898	80.6623	0.100469	0.0895907	0.111348		70.6705	0.228972	101.953	0.0860981	0.0768809	0.0953153
27.8672	0.111678	80.684	0.100473	0.0895943	0.111352		171.821	0.139665	102.012	0.0860893	0.076874	0.0953045
87.9554	0.179186	80.7187	0.100479	0.0896002	0.111359		8.34421	0.163815	102.012	0.0860893	0.076874	0.0953045
27.4997	-0.0150905	80.749	0.100485	0.0896053	0.111364		190.111	0.242661	102.087	0.0860779	0.0768652	0.0952907
19.8009	0.0450577	81.052	0.100539	0.0896556	0.111423		45.1525	0.155079	102.382	0.0860336	0.0768303	0.095237
83.1487	0.214589	81.0876	0.100546	0.0896615	0.11143		111.607	-0.0316956	102.914	0.0859536	0.0767663	0.0951409
61.5379	0.111947	81.1398	0.100555	0.08967	0.11144		71.6734	0.0260327	102.997	0.0859412	0.0767563	0.0951261
25.6654	-0.032239	82.2513	0.100755	0.0898426	0.111667		59.7104	0.185023	103.36	0.0858867	0.0767118	0.0950615
85.9744	0.184207	82.2587	0.100756	0.0898436	0.111668		86.7226	0.172912	103.368	0.0858854	0.0767108	0.09506
89.1009	0.118581	83.1173	0.10091	0.0899653	0.111855		99.5838	0.00480045	103.419	0.0858777	0.0767045	0.095051
98.2501	-0.0391621	83.1487	0.100916	0.0899696	0.111862		20.8396	0.109253	103.475	0.0858694	0.0766976	0.0950412
71.9871	0.00350212	83.4694	0.100973	0.0900124	0.111934		72.8907	0.0179561	103.509	0.0858643	0.0766934	0.0950352
72.0099	0.0839389	83.5257	0.100983	0.0900197	0.111947		118.27	-0.025259	103.903	0.085805	0.0766441	0.0949659
76.7632	0.149585	83.9063	0.101052	0.0900684	0.112035		126.197	0.102934	104.861	0.085661	0.0765214	0.0948005
81.0876	0.141473	84.6781	0.10119	0.0901611	0.112219		48.3922	0.0724244	104.948	0.085648	0.0765101	0.0947859
70.0539	0.282075	85.5032	0.101338	0.0902516	0.112425		131.202	0.0661179	105.017	0.0856376	0.0765011	0.0947741
83.5257	-0.0164932	85.9403	0.101417	0.0902959	0.112538		124.575	0.0302031	105.34	0.085589	0.0764585	0.0947195
105.796	0.0936308	85.9566	0.10142	0.0902975	0.112542		81.6731	0.14487	105.345	0.0855883	0.0764579	0.0947188
101.93	0.0755805	85.9566	0.10142	0.0902975	0.112542		72.9353	-0.0198987	105.978	0.0854931	0.076373	0.0946132
94.4287	0.135875	85.9744	0.101423	0.0902992	0.112547		67.6748	0.156511	106.015	0.0854876	0.076368	0.0946071
80.684	0.157681	86.2664	0.101475	0.0903274	0.112624		49.9796	0.039237	106.366	0.0854349	0.0763202	0.0945496
96.4833	0.161025	86.3365	0.101488	0.0903339	0.112642		48.7843	-0.0392142	107.369	0.085284	0.0761801	0.094388
95.2428	0.0572344	87.0838	0.101622	0.0904003	0.112844		122.95	0.0718834	107.954	0.0851961	0.0760963	0.0942959
101.115	0.128023	87.1452	0.101633	0.0904054	0.112861		119.269	0.167993	108.351	0.0851366	0.0760386	0.0942345
88.7399	0.129304	87.4819	0.101694	0.0904327	0.112955		80.8439	0.135625	108.377	0.0851325	0.0760347	0.0942304
91.1842	0.152201	87.8997	0.101769	0.0904647	0.113073		83.1658	-0.0363069	108.551	0.0851064	0.0760092	0.0942037
89.5238	0.0379963	87.9554	0.101779	0.0904688	0.113089		101.953	0.143682	108.936	0.0850486	0.0759521	0.094145
86.2664	0.0816639	88.3537	0.10185	0.090497	0.113203		114.591	0.0857406	108.936	0.0850486	0.0759521	0.094145
99.0473	-0.028014	88.3537	0.10185	0.090497	0.113203		155.189	0.115741	109.489	0.0849655	0.0758689	0.0940621
114.366	0.130472	88.6949	0.101911	0.0905197	0.113303		89.0109	-0.00150876	109.87	0.0849082	0.0758107	0.0940057
92.7748	0.15479	88.6997	0.101912	0.09052	0.113305		119.211	0.0158388	110.38	0.0848316	0.0757318	0.0939314
101.527	0.121925	88.7399	0.10192	0.0905225	0.113316		125.776	-0.0534985	111.529	0.0846589	0.0755495	0.0937683
89.9274	0.748357	88.7527	0.101922	0.0905234	0.11332		131.724	0.13204	111.607	0.0846472	0.0755369	0.0937574
115.682	-0.0461207	89.1009	0.101984	0.0905448	0.113424		159.642	0.0061891	112.441	0.0845219	0.0754005	0.0936432
123.974	0.0131483	89.1138	0.101987	0.0905455	0.113428		167.243	0.21191	112.454	0.0845198	0.0753982	0.0936413
118.308	0.00250545	89.5238	0.10206	0.0905689	0.113552		90.0531	-0.0317203	112.556	0.0845045	0.0753814	0.0936277
129.9	0.221095	89.5417	0.102063	0.0905698	0.113557		187.336	0.0469141	113.089	0.0844244	0.0752922	0.0935566
115.631	0.0485846	89.566	0.102068	0.0905712	0.113564		174.384	0.0533475	113.471	0.084367	0.0752274	0.0935065
126.21	0.16769	89.9274	0.102133	0.0905899	0.113675		101.575	-0.0679093	113.504	0.0843621	0.0752219	0.0935023
110.467	-0.0657501	89.9665	0.10214	0.0905919	0.113688		118.27	0.107197	113.527	0.0843586	0.0752179	0.0934992
109.109	-0.0156867	90.013	0.102148	0.0905941	0.113702		158.329	0.124408	113.587	0.0843495	0.0752076	0.0934914
12.1008	0.212169	90.3219	0.102204	0.0906087	0.113798		162.052	0.00583797	114.506	0.0842114	0.0750486	0.0933741
37.0903	0.0906361	90.3809	0.102214	0.0906113	0.113817		88.1928	0.155658	114.591	0.0841987	0.0750338	0.0933635
47.5182	0.0732593	90.7303	0.102277	0.0906262	0.113927		44.7604	0.0639107	114.661	0.0841881	0.0750215	0.0933547
55.873	0.0479165	90.7501	0.10228	0.090627	0.113934		129.034	0.109017	114.703	0.0841818	0.0750141	0.0933495
53.5714	0.0544865	90.7962	0.102289	0.0906289	0.113948		142.081	0.0929463	115.013	0.0841352	0.0749593	0.093311
50.5672	0.0860423	91.1726	0.102356	0.0906431	0.114069		182.519	0.0344762	115.049	0.0841299	0.074953	0.0933067
49.8061	0.05039	91.1842	0.102358	0.0906436	0.114073		89.5437	0.0550059	115.603	0.0840465	0.0748539	0.0932392
16.1293	0.0387824	91.1974	0.102361	0.090644	0.114077		128.421	-0.0427573	115.702	0.0840316	0.074836	0.0932272
57.7121	0.174679	91.5537	0.102425	0.090656	0.114193		117.655	0.176862	116.624	0.0838931	0.0746677	0.0931184
65.4193	0.0594884	91.5596	0.102426	0.0906562	0.114195		151.016	0.0581269	116.677	0.0838852	0.074658	0.0931124
64.2243	0.00780493	91.9722	0.1025	0.0906683	0.114331		181.188	0.0821164	117.294	0.0837924	0.074543	0.0930418
23.0985	-0.0761994	91.9722	0.1025	0.0906683	0.114331		118.816	0.173735	117.631	0.0837418	0.0744795	0.093004
54.7198	0.171673	91.9805	0.102501	0.0906685	0.114334		107.369	0.127251	117.64	0.0837403	0.0744777	0.093003
47.893	-0.0461215	92.0156	0.102508	0.0906694	0.114346		139.757	-0.00403285	117.655	0.0837382	0.074475	0.0930014
58.9198	0.153271	92.4327	0.102582	0.0906796	0.114485		114.506	-0.017414	117.799	0.0837165	0.0744477	0.0929854
57.0194	0.255311	92.7748	0.102644	0.0906866	0.114601		158.967	0.0704077	118.154	0.0836631	0.0743799	0.0929463
41.1799	0.0734979	92.8676	0.102661	0.0906883	0.114633		195.055	-0.0177301	118.27	0.0836457	0.0743577	0.0929337
78.3093	0.157795	92.8861	0.102664	0.0906886	0.114639		104.948	0.0214207	118.816	0.0835637	0.0742523	0.0928751
66.5646	-0.0460112	93.1857	0.102718	0.0906934	0.114742		117.294	0.149409	119.211	0.0835043	0.0741752	0.0928334
87.1452	-0.0191932	93.1984	0.10272	0.0906936	0.114746		102.914	0.180084	119.269	0.0834956	0.0741638	0.0928273
85.5032	0.203797	93.2874	0.102736	0.0906948	0.114777		85.338	0.067606	119.328	0.0834868	0.0741523	0.0928213
75.9127	0.116372	93.657	0.102802	0.0906991	0.114906		46.7263	0.0917385	119.364	0.0834813	0.0741451	0.0928175
70.8925	0.0528202	94.0486	0.102873	0.0907021	0.115043		54.4764	0.020716	119.876	0.0834044	0.0740439	0.0927649
70.4172	0.209403	94.1299	0.102887	0.0907025	0.115072		40.068	0.0871781	120.358	0.0833319	0.0739474	0.0927164
79.5177	0.0793208	94.4201	0.102939	0.0907036	0.115175		50.0137	0.0957962	120.468	0.0833153	0.0739252	0.0927054
88.7527	0.067283	94.4287	0.102941	0.0907036	0.115178		49.193	0.165115	121.346	0.0831834	0.0737468	0.09262
70.0539	0.0012716	94.9001	0.103025	0.0907035	0.115347		132.839	0.014387	121.358	0.0831816	0.0737443	0.0926189
67.7523	-0.0326555	95.2428	0.103087	0.0907021	0.115472		116.677	0.128253	121.877	0.0831037	0.0736373	0.09257
71.5936	0.162241	95.6589	0.103162	0.090699	0.115624		106.366	0.00743499	121.921	0.083097	0.0736281	0.0925658
66.2281	-0.0583769	95.6868	0.103167	0.0906987	0.115635		146.186	-0.0550868	122.407	0.0830239	0.0735267	0.0925211
73.9352	0.0643893	95.7112	0.103171	0.0906985	0.115644		146.186	0.0739892	122.41	0.0830235	0.0735262	0.0925209
98.5632	0.114371	96.1057	0.103242	0.0906938	0.11579		12.883	0.140033	122.95	0.0829423	0.0734123	0.0924723
73.9979	0.0905024	96.118	0.103244	0.0906937	0.115795		73.7289	0.0410199	122.975	0.0829385	0.073407	0.0924701
128.11	0.21862	96.1845	0.103256	0.0906928	0.115819		57.2202	0.0759003	124.024	0.0827809	0.0731826	0.0923792
64.6582	0.153407	96.4833	0.10331	0.0906881	0.115931		131.329	0.193901	124.13	0.082765	0.0731597	0.0923703
96.4859	0.0506207	96.4859	0.10331	0.0906881	0.115932		122.407	0.103924	124.575	0.0826981	0.073063	0.0923333
79.4857	0.0250541	96.4965	0.103312	0.0906879	0.115936		109.489	0.118936	124.77	0.0826689	0.0730204	0.0923174
67.7411	0.0488203	96.9339	0.103391	0.0906796	0.116102		69.0156	0.0173391	125.184	0.0826066	0.0729292	0.0922839
53.9816	-0.0746087	97.3147	0.103459	0.0906711	0.116247		58.6052	0.156201	125.776	0.0825176	0.072798	0.0922373
71.6144	0.0310658	98.1641	0.103611	0.0906476	0.116575		104.861	0.171107	125.776	0.0825176	0.072798	0.0922373
62.301	0.0181242	98.199	0.103618	0.0906465	0.116589		144.375	0.16914	126.197	0.0824544	0.0727038	0.0922049
103.67	0.0627864	98.2501	0.103627	0.0906449	0.116609		144.375	0.0990721	126.304	0.0824382	0.0726797	0.0921968
96.9339	0.306008	98.5632	0.103683	0.0906345	0.116732		65.7047	-0.0661718	126.34	0.0824328	0.0726716	0.0921941
90.7501	0.0857811	98.5686	0.103684	0.0906344	0.116734		144.375	-0.103717	126.753	0.0823708	0.0725784	0.0921632
93.657	-0.0141005	98.6227	0.103694	0.0906325	0.116755		131.867	0.0734228	126.783	0.0823662	0.0725714	0.092161
89.5417	0.0195829	98.9885	0.103759	0.0906192	0.1169		88.1928	-0.0097117	126.835	0.0823585	0.0725597	0.0921572
100.689	-0.0192925	98.9966	0.103761	0.0906189	0.116903		99.4607	0.166589	126.868	0.0823534	0.0725522	0.0921547
70.0735	-0.115493	99.0473	0.10377	0.090617	0.116923		159.58	0.0603071	127.841	0.0822072	0.0723294	0.0920849
104.435	0.0744906	99.4292	0.103839	0.0906019	0.117075		142.001	0.0177127	127.88	0.0822013	0.0723204	0.0920822
121.762	-0.000881784	99.4419	0.103841	0.0906014	0.11708		87.2681	0.167227	127.932	0.0821936	0.0723085	0.0920786
111.367	0.0587997	99.8118	0.103907	0.0905856	0.117229		89.9974	0.0172467	128.421	0.0821201	0.0721951	0.092045
143.239	0.207528	99.8227	0.103909	0.0905851	0.117233		76.0137	0.182537	128.468	0.0821131	0.0721842	0.0920419
55.5101	-0.0417199	99.841	0.103913	0.0905843	0.117241		159.533	0.0182154	128.943	0.0820416	0.0720731	0.0920101
32.2993	0.0260529	99.8528	0.103915	0.0905838	0.117246		158.308	0.0619245	129.034	0.0820279	0.0720516	0.0920041
71.6741	0.123977	100.232	0.103983	0.0905665	0.117399		146.256	-0.066428	129.107	0.0820169	0.0720345	0.0919993
65.771	0.0751054	100.237	0.103984	0.0905662	0.117401		155.201	-0.00837115	130.113	0.0818657	0.0717961	0.0919353
49.4196	0.072063	100.254	0.103987	0.0905654	0.117408		103.475	0.0496388	130.604	0.081792	0.0716786	0.0919054
68.4983	0.0876257	100.309	0.103996	0.0905628	0.11743		101.93	0.100266	130.635	0.0817873	0.071671	0.0919035
68.4983	0.289332	100.677	0.104063	0.0905448	0.117581		154.676	0.0949463	131.162	0.0817081	0.0715438	0.0918723
72.3755	0.288486	100.689	0.104065	0.0905442	0.117585		139.79	0.000493148	131.202	0.0817021	0.0715342	0.09187
79.8792	-0.0200378	101.069	0.104133	0.0905245	0.117741		99.5838	0.00543621	131.255	0.0816941	0.0715213	0.0918669
83.1173	0.146493	101.102	0.104139	0.0905228	0.117755		113.527	-0.098619	131.329	0.081683	0.0715033	0.0918627
66.5324	0.033826	101.115	0.104141	0.0905221	0.11776		140.43	0.107743	131.724	0.0816237	0.0714072	0.0918401
60.7892	-0.0439416	101.482	0.104207	0.090502	0.117912		85.3767	0.166295	131.867	0.0816021	0.0713722	0.0918321
64.2287	0.119907	101.527	0.104215	0.0904994	0.117931		54.4553	0.157509	132.839	0.0814561	0.071133	0.0917793
63.1416	-0.0187484	101.594	0.104227	0.0904957	0.117959		69.4771	-0.0870704	132.855	0.0814537	0.071129	0.0917784
60.4185	-0.0758554	101.93	0.104288	0.0904762	0.118099		155.798	0.106691	132.919	0.0814441	0.0711131	0.091775
31.1824	0.11449	101.986	0.104298	0.0904729	0.118122		75.6186	-0.0194453	132.919	0.0814441	0.0711131	0.091775
27.4997	0.222569	102.435	0.104378	0.0904456	0.118311		73.3839	0.0560775	133.411	0.0813701	0.0709907	0.0917496
80.2668	0.12282	102.761	0.104437	0.0904249	0.118449		141.514	0.0147604	133.497	0.0813572	0.0709692	0.0917452
71.2283	-0.11098	102.795	0.104443	0.0904227	0.118463		135.095	0.17537	135.095	0.081117	0.0705659	0.0916681
74.4121	-0.00848474	103.197	0.104515	0.0903962	0.118634		106.015	0.0498624	135.127	0.0811121	0.0705576	0.0916666
73.149	0.0745419	103.209	0.104517	0.0903953	0.118639		178.376	0.0134935	135.662	0.0810318	0.0704211	0.0916426
76.7495	-0.0169443	103.67	0.1046	0.0903636	0.118836		88.2255	0.127278	135.664	0.0810314	0.0704204	0.0916425
96.118	0.0515904	104.03	0.104665	0.090338	0.118991		74.618	0.106105	135.673	0.0810302	0.0704183	0.0916421
90.013	0.0039755	104.041	0.104667	0.0903372	0.118996		142.081	-0.0344146	135.705	0.0810253	0.0704099	0.0916407
88.3537	0.0323585	104.067	0.104671	0.0903353	0.119007		147.409	0.0372798	137.39	0.0807721	0.0699736	0.0915707
75.1489	0.072658	104.435	0.104737	0.0903082	0.119166		133.497	-0.0435365	138.52	0.0806022	0.0696763	0.0915281
29.7143	0.0944322	104.913	0.104823	0.0902717	0.119375		147.409	-0.000739028	139.165	0.0805053	0.0695052	0.0915054
91.5537	0.0611933	105.275	0.104888	0.0902433	0.119533		148.025	0.119585	139.707	0.0804239	0.0693606	0.0914872
69.6422	0.253479	105.362	0.104904	0.0902363	0.119571		121.346	0.100427	139.757	0.0804163	0.0693471	0.0914855
81.1398	0.252955	105.382	0.104907	0.0902348	0.11958		25.8129	0.114124	139.79	0.0804113	0.0693381	0.0914844
61.5301	0.0853429	105.403	0.104911	0.0902331	0.119589		154.567	0.807792	140.254	0.0803417	0.0692137	0.0914696
65.0049	0.0641579	105.761	0.104975	0.0902039	0.119747		155.183	0.118696	140.321	0.0803315	0.0691956	0.0914675
120.017	0.218942	105.778	0.104978	0.0902026	0.119754		183.134	-0.0322936	140.43	0.0803151	0.0691662	0.091464
106.627	0.0966671	105.796	0.104982	0.090201	0.119762		155.183	0.0980051	141.514	0.0801523	0.0688727	0.0914318
110.825	0.0812559	106.194	0.105053	0.0901678	0.119938		131.329	0.00215432	142.001	0.080079	0.0687397	0.0914183
67.3308	0.000240417	106.611	0.105128	0.090132	0.120124		53.5608	0.114581	142.081	0.0800671	0.068718	0.0914162
52.8514	0.0619954	106.627	0.105131	0.0901305	0.120131		195.779	0.137899	142.154	0.080056	0.0686979	0.0914142
94.1299	-0.0905958	107.448	0.105278	0.0900574	0.120499		190.208	0.0262562	143.251	0.0798912	0.0683962	0.0913862
98.5686	0.249354	107.838	0.105348	0.0900215	0.120675		133.411	0.140416	143.285	0.0798861	0.0683867	0.0913854
96.9339	0.22081	107.935	0.105366	0.0900124	0.120719		79.0186	-0.015928	143.892	0.0797949	0.0682186	0.0913711
109.538	0.08114	108.256	0.105423	0.089982	0.120865		71.5512	0.258952	143.892	0.0797949	0.0682186	0.0913711
71.5842	0.0635744	108.261	0.105424	0.0899816	0.120867		81.3046	0.172683	143.935	0.0797884	0.0682067	0.0913702
121.325	0.165508	108.692	0.105502	0.0899401	0.121063		20.8461	0.27295	144.375	0.0797222	0.068084	0.0913604
131.685	0.282862	108.71	0.105505	0.0899384	0.121071		29.5917	0.150864	144.427	0.0797145	0.0680696	0.0913593
90.7303	0.00934843	109.109	0.105576	0.0898992	0.121254		67.724	0.302169	145.071	0.0796176	0.0678894	0.0913459
101.069	0.0820899	109.144	0.105583	0.0898957	0.12127		67.724	0.0994502	145.643	0.0795316	0.0677286	0.0913347
91.9722	-0.0259307	109.172	0.105588	0.0898929	0.121282		130.604	0.191524	146.186	0.07945	0.0675753	0.0913247
101.594	0.0421213	109.189	0.105591	0.0898912	0.12129		116.624	0.183178	146.186	0.07945	0.0675753	0.0913247
93.1857	-0.00211781	109.538	0.105653	0.0898562	0.121451		128.943	0.115355	146.218	0.0794452	0.0675662	0.0913242
108.71	0.0604624	109.627	0.105669	0.0898472	0.121492		143.892	0.0776589	146.256	0.0794395	0.0675556	0.0913235
119.583	0.0828379	109.99	0.105735	0.08981	0.121659		62.7409	0.00416956	146.796	0.0793584	0.0674024	0.0913143
100.254	0.0404959	110.467	0.10582	0.0897603	0.12188		72.3954	0.0810887	146.831	0.0793531	0.0673925	0.0913137
108.256	0.0378898	110.825	0.105884	0.0897224	0.122047		80.0262	0.269223	147.315	0.0792803	0.0672546	0.091306
98.6227	0.0134864	111.367	0.105982	0.0896639	0.1223		119.876	0.0363884	147.315	0.0792803	0.0672546	0.091306
113.43	0.120067	111.389	0.105986	0.0896615	0.12231		132.855	0.301977	147.351	0.079275	0.0672446	0.0913055
107.935	-0.0823666	112.137	0.10612	0.0895788	0.122661		103.36	0.0535071	147.409	0.0792663	0.067228	0.0913046
122.642	0.121023	113.039	0.106282	0.0894762	0.123088		150.471	0.0634737	147.907	0.0791913	0.0670854	0.0912972
134.494	-0.0197097	113.43	0.106352	0.0894307	0.123274		165.878	0.128816	147.99	0.079179	0.0670619	0.0912961
51.6791	0.122853	113.498	0.106364	0.0894228	0.123306		119.364	-0.0702357	148.025	0.0791737	0.0670519	0.0912956
120.05	0.163876	114.366	0.10652	0.0893197	0.123721		81.7235	0.23705	148.526	0.0790984	0.066908	0.0912888
87.9554	0.0936502	114.386	0.106524	0.0893173	0.12373		111.529	-0.00454969	150.34	0.0788257	0.0663831	0.0912683
109.144	0.447387	114.737	0.106587	0.0892749	0.123899		126.868	0.0405017	150.471	0.078806	0.066345	0.0912671
129.85	0.354229	115.631	0.106747	0.0891648	0.12433		103.419	0.102194	151.016	0.0787242	0.0661861	0.0912622
117.902	0.192317	115.682	0.106756	0.0891585	0.124354		117.799	-0.0783283	151.515	0.0786491	0.0660399	0.0912583
98.1641	0.0958741	117.776	0.107132	0.0888904	0.125374		166.525	0.170727	151.575	0.0786401	0.0660224	0.0912578
117.81	0.11762	117.789	0.107135	0.0888887	0.125381		105.345	0.0666313	152.125	0.0785575	0.0658609	0.091254
130.723	0.109418	117.81	0.107139	0.0888859	0.125391		102.087	0.0696228	152.23	0.0785417	0.06583	0.0912533
82.2513	0.286116	117.841	0.107144	0.0888819	0.125406		64.0149	-0.0334909	154.081	0.0782634	0.0652822	0.0912446
117.789	0.021732	117.88	0.107151	0.0888768	0.125425		120.358	0.122579	154.567	0.0781905	0.0651377	0.0912433
122.275	0.261738	117.902	0.107155	0.0888738	0.125437		132.919	0.0647765	154.676	0.078174	0.065105	0.091243
154.767	0.132451	118.217	0.107212	0.0888323	0.125591		115.049	0.13111	155.183	0.0780979	0.0649537	0.0912421
32.2861	0.0620289	118.223	0.107213	0.0888314	0.125594		126.304	0.103149	155.189	0.078097	0.0649519	0.0912421
39.7148	-0.0961178	118.308	0.107228	0.0888202	0.125636		159.683	0.091453	155.201	0.0780952	0.0649483	0.091242
56.1932	0.105045	118.677	0.107294	0.0887711	0.125817		165.33	0.030201	155.798	0.0780054	0.0647692	0.0912415
53.9183	0.098119	119.136	0.107377	0.0887095	0.126044		110.38	0.0205596	155.826	0.0780012	0.064761	0.0912415
60.7722	0.120106	119.583	0.107457	0.0886487	0.126265		109.87	NaN	156.546	0.077893	0.0645445	0.0912415
65.0385	-0.0273415	119.583	0.107457	0.0886487	0.126265		146.186	-0.122154	157.113	0.0778078	0.0643735	0.0912421
39.7148	0.194238	120.017	0.107535	0.0885894	0.12648		151.515	-0.0722547	157.72	0.0777166	0.06419	0.0912432
30.0766	0.077614	120.05	0.107541	0.0885848	0.126497		72.4662	0.0204583	158.308	0.0776282	0.0640116	0.0912448
56.2585	0.0574271	120.934	0.107699	0.0884623	0.126937		135.095	-0.0415428	158.329	0.077625	0.064005	0.0912449
66.9213	0.109692	121.325	0.10777	0.0884077	0.127131		163.993	0.0944924	158.967	0.0775291	0.063811	0.0912472
64.2177	0.0441709	121.762	0.107848	0.0883458	0.127351		157.113	0.200968	158.998	0.0775245	0.0638016	0.0912473
68.099	-0.0598145	121.841	0.107862	0.0883347	0.12739		96.2584	0.00474234	159.533	0.0774441	0.0636384	0.0912497
31.5822	0.0122197	122.224	0.107931	0.0882802	0.127582		114.661	0.00134361	159.533	0.0774441	0.0636384	0.0912497
35.2555	0.0903053	122.275	0.10794	0.088273	0.127607		170.411	0.12503	159.558	0.0774403	0.0636308	0.0912498
69.7152	0.114569	122.642	0.108006	0.0882204	0.127792		110.38	NaN	159.58	0.077437	0.0636241	0.0912499
66.9561	0.071919	123.974	0.108245	0.0880268	0.128464		158.998	-0.000763507	159.642	0.0774277	0.0636051	0.0912502
56.9629	0.101209	124.411	0.108324	0.0879626	0.128685		92.4523	-0.0695741	159.683	0.0774216	0.0635927	0.0912504
37.4776	0.16908	124.876	0.108407	0.0878937	0.128921		75.56	-0.0502442	160.252	0.077336	0.0634185	0.0912535
52.468	0.0497286	126.21	0.108647	0.0876937	0.129599		131.867	0.0244321	160.333	0.0773238	0.0633936	0.091254
42.2894	0.178203	126.251	0.108654	0.0876874	0.129621		160.333	0.267902	160.799	0.0772538	0.0632508	0.0912569
75.1157	0.157166	128.11	0.108988	0.087403	0.130572		82.6094	-0.0739025	160.836	0.0772482	0.0632393	0.0912571
85.9566	0.149026	129.85	0.1093	0.087131	0.131469		105.978	0.129649	162.052	0.0770655	0.062865	0.091266
72.776	0.0637409	129.9	0.109309	0.0871232	0.131495		93.2537	0.251518	162.162	0.0770489	0.0628309	0.0912669
70.8428	0.0307781	129.922	0.109313	0.0871198	0.131506		88.6414	0.063751	163.321	0.0768748	0.0624724	0.0912771
77.9184	0.0568774	130.345	0.109389	0.0870529	0.131725		142.154	0.0313235	163.993	0.0767737	0.0622636	0.0912838
66.5566	0.260597	130.723	0.109457	0.0869928	0.131921		175.111	0.0873317	165.33	0.0765729	0.061847	0.0912987
15.032	0.148598	131.685	0.10963	0.086839	0.13242		70.3915	0.152238	165.368	0.0765671	0.061835	0.0912991
25.6654	0.252718	134.494	0.110134	0.0863825	0.133885		98.4788	0.163157	165.878	0.0764905	0.0616757	0.0913053
31.1801	0.0968668	143.239	0.111704	0.084899	0.138509		89.1909	-0.0791239	165.99	0.0764736	0.0616405	0.0913068
37.8554	0.172293	144.244	0.111884	0.0847236	0.139045		176.483	0.251899	166.525	0.0763932	0.0614728	0.0913136
62.7282	-0.00995733	154.767	0.113774	0.0828383	0.144709		131.867	0.114007	166.654	0.0763739	0.0614324	0.0913153
43.7862	0.0889172	159.181	0.114566	0.0820261	0.147106		146.256	0.174604	167.243	0.0762853	0.0612472	0.0913233
62.7507	0.0529349						129.107	0.0870361	168.509	0.076095	0.0608483	0.0913418
77.5075	-0.0456475						20.8319	0.102007	169.107	0.0760051	0.0606592	0.091351
90.3219	-0.0387489						50.7839	0.0537203	169.244	0.0759845	0.0606158	0.0913532
95.6868	0.187361						156.546	0.134656	169.918	0.0758832	0.0604024	0.0913641
36.7568	0.193377						86.3186	0.0924934	170.411	0.0758091	0.0602458	0.0913724
43.4095	0.250542						183.967	0.117196	170.549	0.0757884	0.060202	0.0913748
31.5486	0.0633124						186.017	0.0988126	171.118	0.0757029	0.0600212	0.0913847
38.2239	0.20902						166.654	-0.0136034	171.762	0.0756061	0.059816	0.0913962
98.199	0.0376764						175.795	0.0522833	171.821	0.0755972	0.0597971	0.0913973
102.795	0.122587						108.936	0.159129	173.106	0.0754041	0.0593866	0.0914215
87.0838	0.0918292						146.796	0.212327	174.37	0.0752141	0.0589814	0.0914468
77.9184	-0.0696942						188.127	-0.027322	174.384	0.0752121	0.0589771	0.091447
65.7767	0.155187						193.641	0.262431	175.111	0.0751027	0.0587433	0.0914622
24.5629	0.125705						99.9733	0.067591	175.148	0.0750972	0.0587314	0.091463
74.4121	0.126205						63.4407	0.0474569	175.795	0.0749999	0.0585231	0.0914768
89.9665	0.113971						59.7104	0.101472	175.836	0.0749939	0.0585101	0.0914777
98.9966	0.181789						94.1707	0.0141484	176.483	0.0748966	0.0583013	0.0914918
72.0314	-0.0207659						83.6049	0.0202461	176.527	0.07489	0.0582872	0.0914928
101.986	0.0621278						77.7106	0.0131044	177.039	0.074813	0.0581218	0.0915043
99.8227	0.0122017						78.5988	0.0203086	178.376	0.074612	0.0576889	0.0915352
80.749	-0.0148323						128.468	0.0106072	180.408	0.0743067	0.0570288	0.0915845
99.4292	0.0374245						126.783	-0.00677099	180.435	0.0743026	0.0570199	0.0915852
66.5358	0.208517						56.1112	0.0635488	181.188	0.0741894	0.0567745	0.0916043
118.217	0.218669						39.7073	0.201416	182.519	0.0739894	0.05634	0.0916388
112.137	0.096753						102.012	0.0437735	183.134	0.073897	0.0561388	0.0916552
126.251	0.1749						31.8934	0.0817679	183.165	0.0738923	0.0561286	0.091656
							112.556	0.197856	183.967	0.0737717	0.0558657	0.0916777
							13.2617	-0.0672782	184.54	0.0736856	0.0556777	0.0916935
							34.6225	0.0722155	185.221	0.0735833	0.0554541	0.0917124
							35.0139	0.066013	185.894	0.0734821	0.0552326	0.0917315
							143.892	-0.0629639	186.017	0.0734636	0.0551922	0.091735
							29.6445	0.0240803	187.336	0.0732653	0.0547576	0.0917731
							55.1767	0.0834035	188.021	0.0731625	0.0545318	0.0917933
							121.921	0.0378025	188.127	0.0731466	0.0544967	0.0917964
							112.441	0.0189597	188.708	0.0730592	0.0543046	0.0918138
							113.587	-0.110736	190.111	0.0728483	0.0538401	0.0918564
							108.351	0.166891	190.136	0.0728445	0.0538318	0.0918572
							135.127	0.0879711	190.208	0.0728338	0.0538082	0.0918594
							139.707	0.0248333	190.892	0.072731	0.0535814	0.0918806
							126.753	0.0595258	190.892	0.072731	0.0535814	0.0918806
							160.836	0.0897942	193.641	0.0723177	0.0526674	0.0919681
							160.252	0.0116521	193.728	0.0723047	0.0526385	0.0919709
							79.9967	0.130735	194.365	0.072209	0.0524263	0.0919917
							112.454	-0.11441	195.055	0.0721052	0.052196	0.0920145
							36.97	0.186474	195.779	0.0719965	0.0519545	0.0920385
							174.37	-0.0163932	200.108	0.0713459	0.0505045	0.0921872
							65.5781	0.16766
							62.2857	-0.0285992
							34.2184	0.0839154
							36.9587	0.191471
							143.285	0.0829358
							72.0048	0.0972434
							99.4976	-0.0676036
							99.996	0.0507169
							68.127	0.100718
							63.4407	-0.0593781
							144.427	0.0389147
							52.4556	0.0895415
							177.039	0.0777616
							97.6139	0.12096
							89.9195	0.0200921
							94.1843	0.164709
							105.34	0.229575
							140.321	0.168488
							152.23	0.117342
							65.971	0.0877975
							103.368	0.0324679
							96.1097	0.0125152
							40.8194	-0.0293807
							86.694	0.0999682
							194.365	0.191338
							97.1476	0.0302096
							98.5804	0.0738489
							40.8107	0.794027
							200.108	0.044851
							58.8941	0.0568702
							69.8739	0.0279576

## Sheet: panel d
SNR for Uncorrected	SNR for Corrected
2.79335	27.4605			MEAN	SEM
12.6748	10.1443		Uncorreted	2.69826	0.178035
3.34563	19.7475		Corrected	2.94818	0.226
7.36595	7.74601
2.71581	7.56254
3.16806	8.12712
3.70441	12.8504
2.37531	9.56975
4.05607	2.54133
4.16212	5.5432
7.6545	5.56523
2.04702	6.09717
1.61196	4.84426
2.96138	4.14284
1.79751	2.72512
2.36483	2.98487
1.78944	4.67158
3.08681	1.98993
1.85373	3.42233
1.98074	3.8786
1.46528	2.39969
1.40273	5.15321
1.95388	2.0215
3.23944	3.56785
1.14959	2.35164
1.02671	2.05195
0.749956	3.55165
3.48226	2.84819
2.14981	2.23162
2.72452	3.05343
23.1037	2.93477
2.45221	3.28135
2.37801	1.94739
1.86682	2.94025
1.20156	1.70715
1.07586	1.67593
2.4645	2.8654
1.69523	1.55925
1.4036	7.04981
1.64165	5.02657
1.18564	5.32396
2.16294	2.67117
1.3181	7.53014
1.09995	3.7789
0.780669	3.37138
1.28203	3.79675
6.55372	1.97188
4.9249	1.45891
9.38055	3.69408
2.9419	1.75868
2.5763	2.49395
2.07321	2.46758
1.6016	3.12497
0.467548	1.42046
0.484172	2.09146
9.97163	1.01378
2.39165	2.55328
2.41143	0.924046
2.22421	2.11735
2.05397	1.17674
1.88229	1.86189
1.15959	3.37888
14.7699	2.49598
5.90573	1.86495
2.1526	6.21643
4.68739	7.02762
3.65126	5.69276
1.95609	3.10341
2.32809	4.29201
1.24617	4.56051
2.66664	19.3163
2.28312	3.25089
1.2096	3.00138
1.79668	2.54804
2.0579	2.62582
1.78447	3.56235
0.856251	2.41179
2.16858	1.81837
1.7285	2.16071
1.1321	2.02699
0.932289	1.82368
1.04947	1.22825
1.95788	2.5491
1.72912	2.118
1.3916	1.16303
1.24858	1.76137
0.834983	2.42042
1.05943	1.82458
5.04827	2.61087
0.835736	1.03267
0	1.05085
7.44527	1.70012
5.24918	1.80528
5.04439	3.83592
4.38124	1.79042
5.93774	2.12003
8.5097	2.13036
5.22347	5.62836
4.8913	1.01776
4.17026	1.70898
3.43025	1.08671
2.23712	1.42022
2.72357	2.23307
4.41917	2.24497
3.79371	2.84945
3.04924	1.95169
2.72596	1.61102
2.94262	1.77453
3.54062	1.36727
3.11317	1.95169
5.4545	1.56056
3.23601	0.762843
3.06198	1.49581
2.81931	1.97328
2.61151	1.79396
1.92168	1.31099
2.28473	1.91126
7.67911	0.887402
5.02982	1.17164
2.14973	1.38045
1.63958	0.727477
2.41379	0.695792
3.15011	1.50475
2.63367	1.17866
2.28849	2.77394
1.66471	8.10367
2.49357	3.58206
3.33546	4.11514
2.22237	4.49507
1.62959	3.83416
1.54645	1.67927
2.62548	3.28451
1.98118	8.69001
2.23417	1.47959
1.59256	3.25589
1.76727	1.94634
1.19326	1.37179
2.67471	1.32068
1.43304	2.99601
2.46633	2.28606
1.6955	2.43326
0.847279	1.65152
1.72621	1.83371
1.48867	2.17104
1.6219	1.37063
1.74328	1.40959
1.25254	0.934399
0.98672	1.47098
1.70628	2.83046
3.60349	1.75801
1.55963	1.33746
1.46938	1.43372
1.51464	0.884414
1.08558	1.15537
1.95064	1.35662
1.43522	2.23862
0.959253	1.0011
0.841508	3.49151
1.517	4.11703
1.17439	2.37524
0.58693	1.1028
0.669345	1.24847
9.60044	3.95899
3.99691	2.22959
8.91746	1.60594
5.53344	2.88283
2.78619	1.15837
2.56253	2.27769
2.53963	1.00009
1.85155	1.11804
1.30096	1.44817
1.81698	2.28396
1.01699	1.48376
1.40618	0.975498
1.30914	1.42231
1.56847	1.38937
2.31484	1.40455
1.12279	1.41066
5.02895	1.69622
1.45128	0.788887
1.74742	1.83969
2.36884	0.86739
2.13792	1.13402
1.79326	1.01118
1.28294	1.38906
1.64885	1.1939
1.71721	0.866572
1.8299	1.20733
1.49736	0.955121
1.21599	0.783354
1.76494	0.912102
1.75193	0.580783
1.41756
1.65616
1.32491
1.20781
0.856563
1.01318
1.28828
1.30036
1.14138
1.19149
1.43699

## Sheet: panel e
Radial distance for Uncorrected (x)	Pairwise correlation for Uncorrected (y)	Linear regression fit of data (x) for Uncorrected	Linear regression fit of data (y) for Uncorrected	Lower 95% confidence interval for Uncorrected (y)	Upper 95% confidence interval for Uncorrected (y)		Radial distance for Corrected (x)	Pairwise correlation for Corrected (y)	Linear regression fit of data (x) for Corrected	Linear regression fit of data (y) for Corrected	Lower 95% confidence interval for Corrected (y)	Upper 95% confidence interval for Corrected (y)
84.2717	-0.10363	20.7515	0.0187919	-0.167448	0.205032		53.047	0.49945	26.2393	0.152651	-0.08291	0.388213
81.0959	-0.234015	22.1892	0.0222171	-0.160989	0.205423		67.6837	0.511878	31.7451	0.150084	-0.0728211	0.372989
20.7515	0.463417	27.1357	0.0340017	-0.138963	0.206967		160.511	-0.219759	34.794	0.148662	-0.0673614	0.364686
22.1892	0.0975221	28.1148	0.0363343	-0.134644	0.207312		179.639	0.335456	53.047	0.14015	-0.0372086	0.317509
27.1357	-0.125197	28.6698	0.0376566	-0.132201	0.207515		180.981	-0.271403	55.4745	0.139018	-0.0336209	0.311658
28.6698	-0.151048	37.7707	0.0593388	-0.0928984	0.211576		104.499	-0.237849	65.6843	0.134257	-0.0200479	0.288563
28.1148	-0.171038	41.267	0.0676685	-0.0782375	0.213574		34.794	-0.201657	67.6837	0.133325	-0.0177268	0.284377
71.8766	-0.18042	45.5862	0.0779586	-0.0605369	0.216454		26.2393	-0.141908	71.735	0.131436	-0.0134253	0.276297
81.0133	-0.00701512	49.6767	0.0877039	-0.0442571	0.219665		105.104	0.515948	74.0592	0.130352	-0.0112221	0.271926
41.267	0.181626	56.9053	0.104925	-0.0168711	0.226722		55.4745	0.159016	81.1774	0.127033	-0.00584495	0.259911
45.5862	-0.132139	60.8096	0.114227	-0.00294874	0.231403		65.6843	0.0968291	82.1283	0.126589	-0.00529823	0.258477
37.7707	0.170733	64.3704	0.122711	0.00913329	0.236288		161.182	-0.204225	90.6779	0.122603	-0.00244745	0.247653
141.531	0.635553	64.7334	0.123575	0.0103296	0.236821		74.0592	0.585499	97.0157	0.119647	-0.00295923	0.242254
144.674	0.670332	67.0404	0.129071	0.0177713	0.240372		97.0157	0.21256	98.1273	0.119129	-0.0032941	0.241552
153.146	-0.158952	71.8766	0.140593	0.0324201	0.248767		117.961	0.216135	100.358	0.118089	-0.00419054	0.240368
64.7334	-0.126699	81.0133	0.162361	0.0562781	0.268443		174.178	0.384099	104.499	0.116157	-0.0066514	0.238966
146.516	0.222129	81.0959	0.162558	0.0564702	0.268645		31.7451	-0.162887	105.104	0.115876	-0.00709648	0.238848
64.3704	0.171762	84.1561	0.169848	0.0632841	0.276413		98.1273	0.131964	114.93	0.111294	-0.0172828	0.23987
60.8096	0.509509	84.2717	0.170124	0.0635299	0.276717		146.057	0.314056	117.961	0.10988	-0.0214766	0.241237
93.6731	0.457287	92.397	0.189481	0.0788105	0.300152		90.6779	0.602609	133.03	0.102853	-0.0483544	0.25406
49.6767	0.503332	93.6731	0.192522	0.0808663	0.304177		71.735	-0.0250987	146.057	0.0967785	-0.0776248	0.271182
99.7868	-0.131936	99.7868	0.207087	0.0895467	0.324628		82.1283	-0.101543	160.511	0.0900384	-0.114245	0.294322
127.75	0.527902	106.188	0.222337	0.0967966	0.347878		114.93	0.0552001	161.182	0.0897253	-0.116024	0.295474
106.188	0.329896	127.75	0.273707	0.111477	0.435938		81.1774	0.407687	174.178	0.0836654	-0.151431	0.318762
142.614	0.726826	138.281	0.298796	0.115161	0.482431		133.03	-0.279094	179.639	0.0811187	-0.166778	0.329015
56.9053	0.231846	141.531	0.306539	0.116003	0.497076		100.358	-0.112057	180.981	0.0804929	-0.170584	0.331569
138.281	-0.0364917	142.614	0.30912	0.116257	0.501982
84.1561	0.0707986	144.674	0.314028	0.116708	0.511349
92.397	0.389877	146.516	0.318416	0.117075	0.519757
67.0404	0.00614072	153.146	0.334211	0.118154	0.550268
