# Supplementary material for: Extended field-of-view ultrathin microendoscopes for high-resolution two-photon imaging with minimal invasiveness
Source: eLife. 2020 Oct 13;9:e58882. doi: 10.7554/eLife.58882 (PMC7685710; doi:10.7554/eLife.58882)
Supplement: Figure 4—source data 1. — Comparison between data obtained with uncorrected and corrected microendoscopes in silico and in vivo. [file elife-58882-fig4-data1.xlsx]

## Sheet: panel c
# of ROIs for Uncorrected	# of ROIs for Corrected
635	490			MEAN	SEM
378	387		Uncorrected	193.574	30.0215
124	211		Corrected	205.407	21.2094
76	142
42	95
27	66
370	286
236	219
95	128
58	93
31	79
20	55
704	533
393	402
113	200
51	119
23	76
11	48
531	430
328	326
126	181
71	129
41	98
25	64
694	533
413	378
114	195
49	116
22	83
8	48
686	501
366	364
106	188
48	118
25	80
14	47
674	532
403	397
118	207
53	131
34	83
16	46
386	288
270	226
106	137
57	105
32	81
19	59
661	523
370	367
103	179
53	111
29	67
15	45

## Sheet: panel d
	# of ROIs for Uncorrected (y)													# of ROIs for Corrected (y)
Peak-SNR threshold (x)	Simulated Exp 1	Simulated Exp 2	Simulated Exp 3	Simulated Exp 4	Simulated Exp 5	Simulated Exp 6	Simulated Exp 7	Simulated Exp 8	Simulated Exp 9	MEAN	SEM		Peak-SNR threshold (x)	Simulated Exp 1	Simulated Exp 2	Simulated Exp 3	Simulated Exp 4	Simulated Exp 5	Simulated Exp 6	Simulated Exp 7	Simulated Exp 8	Simulated Exp 9	MEAN	SEM
5	635	370	704	531	694	686	674	386	661	593.444	44.1809		5	490	286	533	430	533	501	532	288	523	457.333	33.9706
10	378	236	393	328	413	366	403	270	370	350.778	20.3925		10	387	219	402	326	378	364	397	226	367	340.667	23.5348
15	124	95	113	126	114	106	118	106	103	111.667	3.37886		15	211	128	200	181	195	188	207	137	179	180.667	9.81071
20	76	58	51	71	49	48	53	57	53	57.3333	3.27024		20	142	93	119	129	116	118	131	105	111	118.222	4.87846
25	42	31	23	41	22	25	34	32	29	31	2.4037		25	95	79	76	98	83	80	83	81	67	82.4444	3.11854
30	27	20	11	25	8	14	16	19	15	17.2222	2.06679		30	66	55	48	64	48	47	46	59	45	53.1111	2.71029

## Sheet: panel e
SNR for Uncorrected	SNR for Corrected
3.49436	1.4509			MEAN	SEM
6.5776	1.13892		Uncorrected	2.28984	0.0858393
1.50081	0.267216		Corrected	4.01565	0.0759609
0.297313	1.68386
0.264312	1.71926
3.86156	4.77224
0.267783	1.47277
0.268061	2.33487
1.43645	1.51255
7.06112	1.658
0.275348	3.50516
2.81275	4.10471
0.281335	3.05629
0.272263	2.19162
0.289606	2.20174
0.295938	0.267094
6.73061	8.48041
0.275289	1.34956
1.31898	5.08603
4.7238	1.21971
5.57936	0.29048
0.284991	0.281058
0.267821	5.20547
0.265484	0.297917
3.22625	1.40795
3.39495	1.95092
0.273671	1.4463
6.32671	5.13657
0.275878	4.47657
9.99028	4.66003
0.26949	5.59535
0.283722	2.44895
7.193	3.56039
0.285296	4.38726
8.15533	3.79526
0.267122	0.287076
0.258274	4.78601
4.80355	0.283447
1.80339	7.32346
0.268829	2.10422
0.272667	0.280798
0.265219	0.267559
0.270094	4.33412
0.287558	8.84653
6.69542	0.258148
7.13966	0.265799
4.90641	0.27968
0.271466	8.12608
2.16657	0.271255
4.44215	0.279954
0.298537	6.43923
5.253	4.99857
0.278361	1.86553
2.44873	8.20067
3.87702	8.59046
3.07175	9.02942
0.283126	3.07216
0.267034	0.263943
2.10327	11.0722
7.64701	3.20503
2.63434	0.266098
11.076	12.3315
3.80437	0.280323
0.262401	0.267799
0.262464	0.262578
2.23749	7.04107
1.87103	3.30444
0.269442	6.69647
2.06492	0.276275
3.3005	3.09544
5.00391	6.34171
7.19796	2.41755
5.26557	2.86801
0.267899	0.278529
0.276213	1.27
0.264297	0.275808
4.99326	5.95981
0.268953	0.279794
1.43298	6.28495
0.293826	7.5518
0.271237	0.271899
0.285013	7.22995
0.270952	6.91596
2.66287	0.292954
0.271451	2.98249
4.50066	5.54736
8.26599	2.25022
0.277248	1.89308
4.18976	4.97031
0.258276	6.03119
0.269964	6.19767
0.276686	6.83806
4.1466	11.7647
0.276615	0.277231
0.269754	5.59559
0.262914	2.81737
0.259031	9.7623
0.263388	5.82535
2.59951	2.06936
11.7618	6.31561
0.263712	2.94353
5.81801	3.46077
0.273985	6.53752
2.897	3.50944
0.261699	8.77338
0.274631	2.64194
1.95082	4.45726
0.275114	0.276779
0.265531	0.277399
8.93433	6.40211
1.70774	10.0807
5.99418	4.07746
0.281867	8.56223
0.268616	3.08047
0.277727	2.42353
0.263933	5.80654
1.66512	0.278609
2.5448	7.89405
0.270153	0.284973
8.26763	6.35086
4.72711	4.29324
0.271568	0.264202
2.73431	6.50538
1.09383	0.287682
4.21926	8.62232
0.275379	0.26208
0.313459	3.18292
4.33593	8.47199
0.266812	7.78073
6.19928	4.25492
2.86427	1.90796
0.271125	2.05337
0.281899	9.36379
0.271771	2.70918
4.06316	2.17137
0.275601	3.03756
0.276435	2.99299
1.32121	5.07993
4.65862	3.22301
1.75833	2.94258
2.24948	2.4159
0.274492	2.25661
0.279483	10.091
0.270519	11.0064
4.43696	6.61735
11.7934	10.1883
8.65265	0.273913
0.277586	6.463
0.269999	8.79368
0.264195	3.47234
5.85031	4.11456
2.01359	3.77028
10.5826	0.27668
0.3223	0.267554
5.62188	8.9272
0.26909	7.29641
0.298853	5.99932
0.27131	0.265546
0.266921	0.266733
0.267701	0.307161
0.277129	0.265177
0.262928	3.71526
7.5788	0.280229
0.340417	4.15486
0.278367	9.79726
0.265853	0.279156
0.264976	4.13702
0.267985	4.70379
0.275827	3.62486
7.54478	6.66154
0.257282	3.52114
0.26122	4.10018
0.27597	2.57654
3.825	0.270983
3.20578	6.95978
0.26079	3.04585
11.8712	5.08107
0.257604	4.91695
0.268784	8.007
0.276026	5.01232
11.6865	6.36684
5.51008	7.17344
0.265585	7.28947
0.266994	2.95389
0.262174	0.277696
0.268286	6.91492
7.97425	2.76415
7.03819	7.85757
1.9768	0.259484
0.270212	9.72015
0.257688	3.20791
2.99983	6.55691
0.267812	7.88195
0.266801	1.54856
0.265862	5.22649
0.263503	3.82425
7.75015	4.04418
10.1767	0.283047
0.262385	3.97045
3.43543	8.6399
3.72167	3.89606
2.59625	0.265481
0.27393	5.81503
11.7595	7.17317
0.270362	0.275419
7.66618	3.47362
4.67439	10.444
3.72418	4.80541
0.269356	7.15919
0.275007	3.60405
0.275898	3.86222
0.261496	2.5897
3.60075	4.43869
2.08574	5.17095
0.263629	2.69809
0.269048	7.59934
11.0552	0.284772
0.265228	4.36078
1.13833	1.0232
0.278616	1.4256
5.49493	5.85501
4.65617	0.271435
4.3707	4.47197
0.273725	6.76659
0.309002	3.90415
0.274671	8.28494
1.22522	9.89385
1.53054	1.33709
3.88215	1.85687
9.98034	6.82609
1.59837	6.34376
4.48705	0.267498
1.46059	4.21556
0.275471	0.272626
1.81804	0.27395
0.287979	12.1277
2.00546	6.53161
2.61677	1.49263
0.294657	4.67194
0.282041	4.42161
3.5362	3.11603
0.27717	9.30773
0.286409	6.10285
2.47351	9.80125
2.14282	5.09569
5.76121	8.00355
0.278398	5.71533
2.8707	14.0703
2.68471	10.5933
1.57328	3.27201
1.82362	9.48432
1.53724	12.1871
0.273228	10.377
1.69583	11.0603
3.06661	7.37894
0.278712	9.58196
1.39311	0.267552
0.276738	4.28677
1.83397	11.4468
2.76734	2.55585
0.27669	10.615
3.01229	5.30017
1.38436	2.23991
0.269434	5.32294
0.278297	7.07086
0.270956	0.280171
7.10465	5.90525
0.2675	3.19047
6.68363	4.82459
0.277849	0.266786
3.73477	8.27896
0.266122	13.9791
0.264638	0.283444
0.269612	0.28955
3.48669	4.96108
3.24187	2.18475
2.11867	6.61732
1.63246	9.87054
0.270069	8.26768
3.8658	0.289755
2.81606	11.6123
3.62965	8.0062
2.7614	0.265199
0.277524	0.271429
4.18958	3.07019
3.94837	9.64401
6.56491	7.85592
0.270344	2.47515
0.27864	12.2146
3.93157	5.99863
0.281129	5.90211
5.48657	9.40728
2.25425	3.17053
0.258422	10.1518
0.261719	0.271781
2.75505	2.49851
9.28438	0.259415
0.276881	2.68201
0.272987	6.96212
2.69365	11.606
3.03143	3.49517
0.273184	4.3876
0.259688	8.26937
0.269057	5.5022
0.269252	7.81862
0.272388	0.258805
8.771	10.1028
3.7416	6.90086
2.22899	0.270339
0.262011	9.84409
0.28854	3.66773
0.266531	1.96747
7.97796	6.20964
0.26769	8.76411
5.2574	3.99235
0.285537	2.26721
0.26892	7.9037
3.05672	9.12893
2.22513	10.2378
0.269804	3.08854
0.277915	2.71028
0.269863	4.98935
0.265219	0.263095
0.264309	3.31819
6.84474	10.0359
11.0082	0.288717
0.276082	5.22826
6.9485	0.262941
0.269283	5.03162
1.49315	9.83439
0.291872	11.455
0.283386	8.04177
0.268996	4.76504
0.268593	8.23433
2.96269	12.4865
0.263994	0.261217
0.295686	4.00754
2.92715	3.07056
2.20392	3.32988
2.77491	0.265565
0.27322	0.266208
0.292909	5.08942
8.72709	3.23349
0.281079	2.36472
0.272111	1.44844
0.282537	1.07978
0.267022	4.35659
2.49435	4.45751
0.273094	1.65615
0.266642	0.294347
1.71366	4.90376
0.259765	0.277851
0.276209	0.284474
2.66059	3.9286
3.48107	1.39509
1.643	3.47754
3.09459	0.288295
0.289813	2.022
0.278554	1.62453
8.9561	5.38344
2.50605	2.69637
0.278834	2.68469
1.66072	6.28336
0.261502	2.3437
0.273149	5.36404
0.272423	3.67523
2.27218	3.9109
7.66573	1.35005
0.280061	6.49356
0.273951	0.272231
2.95316	0.276647
0.284176	0.274228
0.28259	0.282806
0.28857	5.23125
0.260924	0.274248
5.98354	0.263466
0.258001	1.89854
0.282208	2.50039
2.34692	1.51593
2.9847	3.88916
0.298065	5.1616
2.1654	5.4044
10.4755	6.8941
2.29489	3.5628
0.262274	6.03876
0.27168	3.18141
0.263853	1.89489
0.284904	1.33682
6.1955	7.049
0.26515	5.40171
9.31982	3.82619
0.290896	3.3033
0.263352	5.97457
0.272692	2.59537
0.258072	3.65685
0.265669	2.54607
2.30162	0.298387
5.1685	0.289612
0.277488	1.40923
0.260271	4.50896
9.77958	3.74317
9.78573	3.47684
0.266751	0.282493
7.0225	0.272064
0.273968	6.17829
2.73254	3.17301
6.31944	5.47345
1.8884	0.285011
7.96356	0.285139
0.268532	2.17413
8.96716	2.48725
3.06468	4.72762
11.073	0.266566
0.274758	0.285141
0.268087	3.70472
0.261355	2.9833
1.79007	6.83268
0.260638	6.24687
5.10697	4.27553
0.274048	6.08647
0.259286	9.60687
2.27582	5.93283
5.62384	2.31361
0.260793	5.6092
6.55866	3.28333
0.266774	2.48828
0.268821	1.99572
3.21928	7.37245
1.77777	3.83529
0.264015	6.39985
0.277045	6.85148
8.14886	0.310275
0.276104	2.34584
0.265523	0.274304
8.90867	6.14416
4.61961	5.72465
1.7868	2.57136
3.2036	9.1084
0.268156	0.267622
0.277721	0.267427
0.263471	0.25894
5.30482	0.267451
0.271308	5.29241
0.276554	9.75619
0.265731	3.5198
0.26212	4.70557
0.273817	3.0338
0.26467	4.95193
0.269736	2.37928
0.273374	6.72095
0.266933	6.11912
0.258925	2.64269
0.264681	5.9897
2.29017	3.03837
0.277662	0.266122
0.273714	6.78395
0.263009	3.00689
0.272455	6.97328
2.80729	0.275046
1.6519	0.290752
3.28186	5.54832
2.97287	0.270183
0.881916	5.88597
0.275062	5.74587
0.288931	5.379
1.4691	11.3053
1.46631	0.298793
0.271758	3.8981
0.2809	0.273553
0.270916	5.08873
0.290254	0.31612
5.22674	0.269597
4.04148	4.61234
0.264109	5.53482
0.278668	7.40087
2.99738	0.259958
2.11693	7.97323
0.269258	6.06185
0.269093	3.11606
6.85672	0.276034
1.6324	6.3461
0.27665	8.39288
0.28812	7.18871
0.288841	7.17084
3.7497	0.294536
0.276615	0.27676
3.19271	0.259256
1.63685	5.85859
0.257084	0.278925
0.282174	3.67316
0.298585	5.92835
6.53393	7.81265
0.280339	3.16789
0.260678	0.29221
2.44703	2.92273
2.6237	4.46002
0.279732	5.36944
0.269514	3.22554
2.02068	8.8788
4.82723	5.41867
0.271498	5.03932
2.69039	0.280908
0.280173	0.268434
0.269663	0.282482
0.264776	9.69848
0.259167	5.57327
0.269154	0.262182
2.85809	5.20163
2.57097	0.275665
3.66419	0.272015
1.98306	3.94226
5.50513	2.83373
0.270305	0.265245
0.262729	6.9412
5.53237	5.56931
8.03672	5.77328
0.275153	8.63317
0.271868	9.29432
0.270589	0.282367
0.271409	3.63048
0.267133	10.8484
0.269959	9.7283
2.98268	9.62471
3.15218	5.49105
2.86652	3.64343
0.267057	7.38828
1.42409	10.8189
2.47796	6.46437
9.19164	6.56567
1.92184	4.27742
0.265859	6.94226
3.30744	2.28156
0.269588	5.82935
0.274811	4.19007
0.276593	6.58285
0.266985	1.74054
0.26101	3.98272
0.27367	3.39555
0.259948	0.283473
5.04273	4.12561
0.274043	3.75692
5.99543	4.98121
0.282334	6.47314
0.261677	10.0305
0.264273	4.19125
0.261833	2.20797
0.28162	0.268431
0.260524	1.57059
3.26722	4.9992
0.262864	5.16504
6.06034	2.86296
0.26528	1.86182
3.74395	0.307618
3.32479	3.26362
2.28404	2.00833
5.1656	0.275342
0.277385	5.93274
0.262826	2.00293
0.266814	0.274634
0.282697	1.57971
3.50243	6.41444
3.14088	2.53004
4.80346	2.66226
0.297047	0.309041
1.98381	0.265409
1.61207	0.301412
1.30721	2.77631
1.28492	6.43044
1.22154	0.268872
2.74592	2.34763
3.60696	4.04364
4.88062	1.98834
1.42598	6.51021
5.57389	8.10425
1.51031	4.26304
2.40684	0.276597
1.7632	7.82302
0.29398	7.90955
0.285303	0.263264
2.54621	4.91966
3.07623	2.11986
0.279165	3.26838
1.27186	1.95112
2.8071	7.67146
1.97506	0.274226
0.276789	0.259471
2.09568	10.2526
0.282885	4.24129
3.26829	2.27488
0.288714	6.7222
0.285559	6.34463
0.301203	1.83117
3.40588	0.307285
3.52413	12.3555
0.274753	0.260879
0.276321	3.75155
3.67104	3.04878
1.44474	2.04844
2.22197	9.04448
2.684	7.29423
5.59658	6.52676
1.96787	9.51411
7.60608	2.21568
0.305527	0.262454
0.274715	7.14432
4.05432	0.271835
2.0272	3.21029
2.2494	2.35632
0.280743	3.13591
2.8795	2.65444
0.289964	7.77875
2.65242	7.528
2.07688	7.11705
0.277858	2.52149
0.28268	5.15215
7.99143	0.264037
3.21231	0.260539
5.28365	0.261373
6.5399	0.282399
0.286073	6.55128
2.8232	0.273802
0.295926	6.87374
3.60716	9.81021
2.50378	2.82936
1.99341	1.91387
5.88118	0.280455
1.49833	5.77516
1.00323	0.263055
6.12923	0.262454
9.06262	0.262406
0.279678	8.92351
6.30893	0.261514
3.89976	4.42345
1.66541	3.37633
7.25521	9.61486
0.280816	0.264665
2.36366	0.265376
0.262968	4.26599
0.273424	6.36241
5.18602	11.4642
1.44401	9.99161
2.94328	3.98341
0.261117	5.18325
8.78767	4.57523
6.04998	9.22968
0.278788	9.26896
6.40557	9.532
0.266365	0.26394
0.278432	0.287679
0.288857	7.51447
2.75521	3.99304
2.45855	7.58596
0.266226	9.74063
0.278876	1.11627
0.282316	2.84871
4.63767	0.29195
1.72467	4.49663
0.2832	3.90955
0.257127	7.84009
0.263014	4.57314
0.264192	3.60344
2.61896	8.33906
0.261335	0.27502
0.287202	0.262079
7.88506	4.98112
0.267413	0.264959
6.27159	0.26439
3.78484	0.273262
0.272856	10.4165
1.67014	0.273459
1.24895	8.73696
0.289004	5.69362
5.93478	9.53549
2.47606	7.88682
2.50216	0.264187
0.271717	0.290045
0.29635	8.0022
8.0675	0.263929
0.974457	0.272342
0.29497	1.57018
0.270477	0.256879
1.40557	3.87462
1.18763	0.276651
3.80195	10.4658
0.309339	11.3988
0.267304	9.50352
1.28965	7.80236
1.68628	6.98375
1.29697	0.259765
3.33819	0.25971
4.91606	4.95608
2.97119	2.51954
0.27807	6.93285
2.63251	0.269089
0.285658	7.01095
0.278437	0.258357
2.61363	6.13982
0.295495	3.68625
2.77781	4.10764
4.16466	2.42272
0.279089	0.267759
4.17174	11.5513
0.263157	0.262988
0.267126	8.53709
1.66137	0.257413
0.273073	0.261199
2.05727	8.80719
0.259755	2.07594
2.46751	8.38699
0.264826	4.95276
0.278169	5.67308
8.7564	0.258205
0.265386	8.22016
0.270166	2.21488
0.276736	2.25536
4.39683	0.269595
0.278089	1.60154
3.20009	4.13333
0.275974	3.35841
6.17436	0.302804
4.68062	0.271293
2.84185	4.16481
0.27158	2.3187
7.80524	1.26825
6.11548	1.34082
6.79563	3.88146
2.70945	3.88237
4.60699	2.96502
0.27125	2.64845
0.269715	1.82916
3.02827	3.0556
0.266511	6.04802
0.258612	6.68206
9.65399	1.67145
3.47568	0.267926
3.85327	0.284956
0.271282	3.1549
2.76345	8.12812
0.277125	2.50162
4.68087	3.16964
2.03691	1.19551
0.303402	3.67645
1.91656	5.13566
6.92865	1.83158
6.57032	7.13224
3.45026	3.02564
0.267512	3.42345
0.281576	2.85485
4.19397	1.6519
4.28639	3.40878
0.263678	2.15267
0.27022	6.58114
0.273946	6.9403
2.72629	0.283438
3.26044	3.0335
0.280029	5.06045
0.264087	6.7866
2.93237	1.39611
0.260351	5.79237
0.273537	0.266067
0.268422	4.39542
0.27318	3.54694
2.40565	0.270703
5.19159	2.00441
2.95604	0.282185
4.73154	4.62229
6.66847	0.290949
0.256745	1.39978
0.265934	0.270739
0.267136	3.59044
0.263185	3.23069
0.292587	9.48306
0.265216	4.10264
2.87741	2.19841
0.26606	2.43148
4.71181	3.08654
2.93475	0.269975
2.60437	6.76385
6.82237	2.4282
0.261394	3.0493
0.264162	2.60923
11.5917	0.286637
6.20548	7.39458
1.62806	0.26351
2.55319	0.269167
0.267769	5.53449
1.2904	4.69847
0.269409	2.81924
0.302604	4.02748
1.58427	1.66435
0.309576	3.03584
0.265652	2.96445
0.291076	0.292494
0.293306	2.7455
0.30607	7.2934
0.276743	5.70523
7.38033	2.23531
0.277339	6.20173
0.277615	6.47381
0.270381	2.88889
2.03891	3.2141
3.23641	7.96018
9.47779	6.23986
6.99339	0.262416
0.275103	0.281064
7.17776	0.27496
7.2511	7.81618
3.11018	5.20327
0.266006	0.273721
8.0313	5.03472
0.271139	7.88564
0.272314	4.2255
5.08905	10.6719
1.80762	2.5455
5.69449	0.2812
2.94629	3.54571
0.272397	0.261956
0.26821	1.88672
0.281912	0.26397
11.1005	1.89003
0.275805	7.17756
0.266397	0.273839
2.2704	4.3363
0.261557	0.283479
0.270864	3.49875
6.38147	0.281335
0.265902	3.64714
1.90341	2.65072
2.43905	7.64026
8.73108	0.27617
0.274883	0.313989
2.76409	7.17867
4.91088	0.263262
0.264919	10.579
5.71632	6.26704
10.6385	3.01586
0.275179	3.07177
2.16012	6.77462
0.266559	7.30075
2.5975	7.4341
0.27585	4.30129
5.33993	4.45812
2.29661	2.05506
2.09885	8.90455
0.268263	7.16022
0.271226	5.90646
0.268596	6.9796
0.271942	5.48497
0.266588	3.34882
0.265552	4.27979
0.291263	2.63216
0.27027	3.54575
1.69092	2.31832
4.35657	8.73845
0.274058	0.279813
0.260772	0.271492
0.265566	0.2798
10.4066	0.274167
0.266665	7.08198
5.85831	0.285762
2.5485	4.81057
7.18947	0.288572
0.290581	4.63268
4.5571	4.35038
0.257552	2.84718
2.37664	6.09733
2.4394	2.66148
7.18339	5.81668
9.40283	4.29108
0.273421	9.45472
0.271471	8.46896
0.260554	8.40064
11.7189	6.47447
4.03701	2.78208
0.273761	6.60283
2.81721	8.68361
3.88678	0.271588
0.277108	0.269446
3.1965	6.30671
0.272912	11.0062
3.33292	7.49926
0.262203	2.57925
0.263932	11.9651
12.6643	2.63432
3.95498	8.09565
0.288971	0.258266
0.263592	4.12161
1.39416	2.66145
1.55816	0.274343
3.52158	5.19961
0.319909	5.83368
0.287223	0.276142
1.56369	6.88272
1.78589	0.261631
5.86404	7.36747
0.274622	2.56758
0.28482	4.50369
1.73924	6.19698
0.303732	8.90602
6.88874	6.54359
1.91404	3.94127
3.54447	2.40401
2.6354	0.262558
1.85084	6.53224
0.266086	2.16116
0.278761	2.62058
1.71498	3.01348
4.64379	3.14526
2.77442	1.93451
0.274387	2.37716
0.308991	0.286013
0.271171	0.323828
2.72038	0.86297
2.07683	1.41646
5.31394	2.41554
0.265465	3.05132
4.255	1.30439
0.267876	2.99154
4.13945	4.02294
0.289682	1.94591
0.28347	2.69883
2.1538	1.51396
4.11668	4.37033
0.286662	1.59449
2.5742	0.29745
0.286374	4.72347
3.7643	3.87464
0.295108	2.65013
0.279407	2.34228
0.277741	1.97677
4.70196	1.4515
4.23533	2.17752
5.79475	2.02544
5.12004	8.49456
0.268856	5.04266
6.63772	2.80208
0.270538	2.3884
0.275636	2.17018
0.270207	3.84728
9.49197	5.64212
0.301024	6.63325
7.8486	7.83552
0.289532	0.288163
0.261526	7.11255
1.89558	3.67754
2.60612	4.87336
4.52507	2.59094
0.265539	2.31617
0.267572	3.35186
0.286113	6.26804
7.91573	0.289817
3.6158	1.11175
10.468	1.48981
3.31165	1.93907
0.258713	1.62288
2.56075	3.14052
3.21329	1.76345
0.268339	4.11291
2.38127	2.33154
2.21843	3.44255
7.2851	6.44949
0.271045	3.10301
0.272923	3.63479
2.15367	2.54357
0.270109	1.18466
4.31438	1.8372
2.41786	2.63428
0.265094	6.52557
0.269902	2.61935
6.6746	3.52319
3.25995	5.71322
4.68455	2.89944
0.263134	4.58813
3.57816	5.4889
3.04275	4.20826
0.287095	5.57301
3.55754	5.64096
3.21892	1.22192
2.15474	2.95278
0.266761	5.24917
2.50869	5.05638
0.257576	5.00142
2.53094	0.277826
8.66583	1.76734
2.22593	3.80845
7.61948	2.46356
10.9426	1.64884
	5.30063
	3.96005
	6.7298
	3.34271
	8.26221
	2.44718
	1.17993
	8.64652
	3.3251
	3.66991
	0.26903
	2.40493
	2.38749
	3.88885
	9.71977
	2.89621
	5.21767
	4.4744
	5.21211
	3.78313
	0.28415
	1.51738
	0.273205
	1.99399
	5.46227
	8.44473
	3.10485
	3.80356
	1.5765
	5.9933
	7.14752
	0.271582
	5.8746
	7.66839
	5.04413
	6.13977
	3.39836
	7.37693
	1.57939
	3.26284
	6.92433
	2.21516
	0.279945
	5.27996
	0.274756
	3.54576
	2.85057
	1.97107
	5.31005
	0.279091
	4.03493
	4.98551
	6.28475
	9.3222
	6.89211
	7.74009
	0.281735
	3.08779
	5.03156
	2.4463
	4.30281
	3.5563
	4.67011
	5.75589
	7.5901
	2.67244
	0.270003
	0.269642
	0.265044
	2.74826
	0.261105
	6.7807
	2.97721
	2.8909
	7.34616
	3.58746
	5.75404
	6.32771
	6.48902
	5.91745
	3.91631
	7.82858
	3.01261
	3.45609
	7.94378
	8.1075
	8.26882
	3.62676
	0.276286
	6.01093
	1.54432
	0.264713
	5.90214
	5.27732
	6.9913
	5.55262
	0.270445
	3.12913
	0.269773
	8.51391
	5.11917
	4.38645
	0.270711
	9.79545
	2.89788
	0.274541
	3.52029
	8.30212
	3.45266
	3.63264
	3.78129
	3.85121
	3.13904
	1.55581
	3.04516
	1.6197
	0.269905
	3.22963
	2.09278
	4.32744
	0.289273
	6.81812
	2.8657
	8.05199
	1.76041
	3.47882
	1.77092
	1.69506
	1.79235
	2.86336
	2.09242
	1.5058
	8.4176
	5.1112
	3.70893
	1.73273
	2.35126
	5.31971
	4.26704
	2.48548
	4.35586
	1.54097
	6.46329
	3.29189
	1.13942
	0.282677
	0.267554
	5.34104
	0.900142
	3.47265
	6.82017
	2.81595
	3.61676
	0.287749
	5.0717
	1.87156
	1.46226
	4.28592
	0.276392
	0.264226
	4.65423
	2.25141
	1.97901
	0.298842
	3.6223
	0.26222
	0.27736
	5.00889
	2.40223
	0.261995
	3.00978
	2.55398
	4.37088
	3.72254
	1.71753
	8.52608
	6.05881
	1.68917
	0.264886
	0.27795
	7.41556
	3.795
	0.278751
	5.15355
	0.277721
	2.38014
	2.3495
	3.08809
	8.18495
	3.46934
	4.19707
	7.76266
	0.262173
	1.83411
	3.06483
	6.82356
	3.91066
	0.272356
	6.97224
	2.84547
	4.15009
	3.74679
	0.279615
	6.55883
	2.58175
	0.277273
	5.85424
	0.284095
	1.92957
	10.0357
	7.44313
	3.31672
	6.0535
	4.84874
	7.3276
	0.282323
	7.59907
	4.12316
	8.05445
	5.64868
	7.81379
	2.2744
	2.05193
	4.63643
	1.46795
	1.61482
	9.49224
	1.87923
	2.39596
	4.90115
	6.90111
	0.270059
	0.278349
	6.80863
	2.79724
	7.72373
	2.13798
	4.02486
	3.97481
	2.23627
	6.82632
	0.271207
	8.21334
	3.4265
	3.42511
	0.269197
	11.3536
	2.52253
	6.13347
	2.19927
	3.77782
	8.02415
	5.69643
	9.4646
	0.263364
	6.43936
	8.04665
	0.262682
	3.31476
	6.40873
	4.3741
	0.286593
	0.25747
	0.266324
	2.70614
	4.68244
	5.21462
	3.77004
	0.267442
	0.261395
	3.90139
	7.96898
	0.258961
	6.88069
	0.267246
	0
	3.42168
	5.93493
	0.261343
	7.83084
	5.9671
	4.23169
	11.1311
	0.275014
	3.86888
	5.48784
	9.05202
	0.261441
	0.274182
	0.26502
	4.30487
	6.69456
	10.616
	4.83987
	2.77232
	6.18689
	7.36428
	5.72117
	0.271421
	0.271883
	1.93168
	8.923
	10.6322
	8.05437
	5.49992
	0.262687
	6.0018
	6.64269
	11.2383
	4.67526
	3.48069
	1.95065
	5.75839
	4.77997
	7.34517
	0.295385
	3.23063
	5.15051
	5.67863
	6.85969
	8.49517
	0.282661
	2.57987
	1.34911
	0.267018
	0.280893
	2.37929
	6.2854
	4.61124
	5.53542
	0.280599
	4.28501
	5.10001
	5.7159
	6.47559
	6.56508
	3.62958
	6.78636
	1.59482
	3.86869
	0.266357
	10.2382
	7.65367
	0.25967
	3.4757
	6.38057
	5.26172
	7.83483
	9.54113
	2.38147
	4.52842
	0.272735
	6.35894
	6.8376
	3.91289
	6.68098
	0.258892
	4.35752
	0.275182
	4.09569
	8.93768
	2.32646
	1.9729
	0.260624
	3.06543
	3.67047
	1.96139
	0.278997
	3.7654
	0.264108
	1.86579
	6.77035
	5.57175
	9.30871
	8.36718
	7.27454
	9.69453
	0.264997
	8.42318
	0.290589
	2.10566
	0.262978
	7.94031
	11.1236
	8.99148
	7.67984
	3.94469
	9.05373
	3.26985
	0.274761
	0.270468
	7.42621
	2.30409
	0.271497
	0.262632
	5.46752
	2.85274
	4.96515
	0.270799
	7.42676
	7.16063
	11.2346
	9.02129
	0.269819
	8.68899
	8.45527
	9.41449
	8.2918
	0.260132
	7.37297
	0.268796
	8.24377
	0.286543
	0.276653
	5.22137
	0.277658
	2.78102
	3.68102
	4.38081
	0.265711
	8.34025
	7.19747
	11.3302
	5.85876
	5.67107
	11.2925
	6.53808
	5.85906
	0.271328
	8.04506
	5.1652
	0.261996
	0.261149
	0.27024
	10.2684
	7.56407
	0.260552
	6.53254
	11.9073
	10.5506
	7.14256
	3.44185
	2.26486
	3.74416
	4.61773
	0.296342
	4.13661
	4.30632
	1.37998
	2.75496
	0.263535
	3.03043
	5.70769
	7.55738
	1.29541
	0.273587
	4.60537
	2.83242
	4.08654
	2.99086
	0.28277
	2.09798
	2.54543
	2.5785
	0.283945
	8.87871
	0.282087
	5.93078
	1.86096
	1.95722
	6.29061
	2.30318
	1.89067
	5.98378
	1.71865
	0.289297
	2.30008
	1.8273
	3.05564
	1.03249
	2.83558
	4.72069
	0.261646
	3.58112
	5.47892
	4.94237
	1.23805
	0.271132
	0.280008
	4.32995
	2.86521
	2.00932
	5.02238
	8.53621
	6.41266
	0.286302
	0.269199
	0.266518
	0.270868
	2.3579
	2.60857
	1.5933
	2.95128
	6.22912
	0.265449
	5.16243
	5.91342
	5.87642
	0.27914
	5.4256
	0.276979
	3.34059
	5.94992
	6.53979
	0.26844
	0.27479
	3.93353
	7.12133
	8.21611
	6.80755
	5.61698
	8.60833
	3.06059
	2.76384
	0.265219
	0.266373
	4.32373
	4.47329
	4.358
	6.00615
	4.90136
	3.96008
	4.83707
	0.260531
	2.83828
	0.286647
	8.30524
	3.68003
	0.261774
	8.26727
	2.42304
	3.47192
	0.275828
	5.97408
	4.61976
	5.14905
	4.38023
	2.73036
	2.93363
	0.27002
	7.29752
	2.21376
	9.38784
	3.75356
	8.03395
	7.55405
	4.49618
	0.272358
	0.265102
	2.17873
	2.73959
	0.273226
	2.31744
	4.98958
	8.36005
	0.263662
	2.78124
	0.294908
	3.9829
	4.93095
	0.28663
	9.51024
	7.06216
	4.4549
	8.86292
	0.263073
	3.7295
	0.277741
	7.33059
	8.38744
	3.79022
	3.37361
	8.97565
	9.04646
	8.8047
	6.91149
	5.21349
	3.36009
	3.48433
	3.96536
	4.78382
	3.10325
	0.280718
	0.261738
	5.733
	6.67404
	7.19202
	1.45131
	7.99679
	0.264755
	5.9608
	0.263429
	0.266805
	1.88816
	0.271876
	6.33081
	5.77592
	9.37418
	0.26039
	6.32186
	0.271117
	4.33922
	11.5402
	3.36628
	10.7317
	5.28535

## Sheet: panel g
Radial distance for Uncorrected (x)	Pairwise correlation for Uncorrected (y)	Linear regression fit of data (x) for Uncorrected	Linear regression fit of data (y) for Uncorrected	Lower 95% confidence interval for Uncorrected (y)	Upper 95% confidence interval for Uncorrected (y)		Radial distance for Corrected (x)	Pairwise correlation for Corrected (y)	Linear regression fit of data (x) for Corrected	Linear regression fit of data (y) for Corrected	Lower 95% confidence interval for Corrected (y)	Upper 95% confidence interval for Corrected (y)
79.1141	0.0012353	8.4382	0.114774	0.0556311	0.173917		78.1868	0.0117307	8.34474	0.197828	0.151422	0.244234
80.7331	-0.0322762	11.7347	0.120607	0.0636833	0.177531		80.0262	-0.0725503	8.34506	0.197828	0.151422	0.244234
78.3093	-0.0617167	12.833	0.122551	0.0663633	0.178738		68.5365	-0.102354	12.1266	0.196922	0.151851	0.241992
21.9945	0.683199	13.932	0.124495	0.0690434	0.179947		35.4554	-0.11332	12.5048	0.196831	0.151894	0.241769
33.4172	-0.12745	15.032	0.126442	0.0717243	0.181159		21.5963	0.545168	13.2615	0.19665	0.151979	0.241321
113.86	0.0322381	15.7631	0.127735	0.0735051	0.181965		33.0954	-0.0980674	14.017	0.196469	0.152063	0.240875
105.316	0.0176208	16.5005	0.12904	0.0753006	0.182779		137.527	-0.0838886	14.0182	0.196469	0.152063	0.240874
106.178	0.121206	19.8009	0.13488	0.0833262	0.186433		148.511	-0.020018	14.7757	0.196287	0.152147	0.240426
92.4327	0.120521	20.1613	0.135517	0.0842014	0.186833		79.077	0.219476	15.5301	0.196106	0.152231	0.239981
98.1453	0.0017212	21.263	0.137467	0.0868757	0.188058		115.579	-0.0489924	15.9082	0.196016	0.152273	0.239758
104.458	0.25244	21.9945	0.138761	0.0886503	0.188872		164.749	-0.0109556	16.2867	0.195925	0.152315	0.239535
92.8355	0.13467	21.9981	0.138768	0.0886591	0.188876		189.484	0.0449172	16.299	0.195922	0.152316	0.239528
104.03	0.338661	22.7339	0.140069	0.090443	0.189696		128.577	-0.0921868	20.8396	0.194834	0.152811	0.236856
104.483	0.339226	23.4622	0.141358	0.0922077	0.190508		145.034	-0.0615354	20.8461	0.194832	0.152811	0.236853
95.6632	0.705616	23.4664	0.141366	0.0922181	0.190513		132.344	-0.0871442	21.2155	0.194744	0.152851	0.236636
81.4554	0.710872	23.8471	0.142039	0.0931401	0.190938		134.552	-0.023892	21.5963	0.194652	0.152892	0.236412
92.0474	0.0563391	24.1976	0.142659	0.0939888	0.19133		158.329	0.0391576	23.536	0.194187	0.153099	0.235276
58.8822	0.00457411	24.5629	0.143306	0.0948731	0.191739		156.436	0.0519969	24.2562	0.194015	0.153175	0.234855
44.201	-0.0854821	25.6626	0.145252	0.0975333	0.19297		185.923	0.0738354	25.7745	0.193651	0.153334	0.233968
52.0304	-0.128471	25.6654	0.145257	0.0975401	0.192973		102.997	0.0169604	25.8129	0.193642	0.153338	0.233945
101.904	0.0478345	26.399	0.146555	0.0993135	0.193796		94.1551	0.852005	25.8293	0.193638	0.15334	0.233936
102.748	0.596548	26.766	0.147204	0.1002	0.194208		86.379	0.0587015	26.5339	0.193469	0.153413	0.233525
52.434	0.316705	27.1317	0.147851	0.101083	0.194619		169.761	-0.0183801	27.6798	0.193194	0.153531	0.232857
102.004	0.100711	27.4997	0.148502	0.101972	0.195033		162.816	-0.0361191	27.74	0.19318	0.153538	0.232822
113.86	0.475559	27.8672	0.149153	0.102859	0.195446		137.379	0.728562	29.2085	0.192828	0.153688	0.231968
117.841	0.00117692	27.8677	0.149153	0.10286	0.195447		119.915	0.019157	29.2653	0.192814	0.153694	0.231935
83.8519	0.79537	29.7071	0.152408	0.107295	0.197521		141.415	0.837487	29.9772	0.192644	0.153766	0.231521
94.513	0.231648	30.0766	0.153062	0.108185	0.197939		180.408	0.29339	30.7414	0.19246	0.153843	0.231078
110.029	0.0245561	30.0839	0.153075	0.108202	0.197947		57.6776	0.138318	30.7442	0.19246	0.153843	0.231076
98.9966	0.531845	31.1801	0.155014	0.11084	0.199189		43.6555	-0.105776	30.7836	0.19245	0.153847	0.231053
128.011	-0.00966609	31.1824	0.155019	0.110846	0.199191		51.1264	-0.0310112	31.127	0.192368	0.153882	0.230854
134.874	0.343311	31.1859	0.155025	0.110854	0.199195		100.422	-0.0538772	31.5151	0.192275	0.153921	0.230629
70.4172	-0.185576	31.2015	0.155052	0.110892	0.199213		101.412	0.632593	31.8934	0.192184	0.153958	0.23041
108.68	0.639738	31.5486	0.155667	0.111726	0.199607		107.954	0.0169457	31.9178	0.192178	0.153961	0.230396
103.209	0.265571	31.5822	0.155726	0.111807	0.199645		142.081	-0.0581241	33.0511	0.191907	0.154073	0.22974
46.0249	0.0499881	31.9186	0.156321	0.112615	0.200027		102.047	0.00573571	33.0701	0.191902	0.154075	0.229729
8.4382	0.120864	32.2861	0.156971	0.113498	0.200445		119.364	-0.0302626	33.0774	0.1919	0.154076	0.229725
127.102	0.688907	32.2869	0.156973	0.1135	0.200446		93.8535	-0.0409055	33.0954	0.191896	0.154078	0.229715
85.5294	0.0392809	32.6668	0.157645	0.114412	0.200878		170.431	0.0219112	33.1059	0.191894	0.154079	0.229709
59.2538	0.257151	33.3944	0.158932	0.116158	0.201706		135.705	0.67766	33.4524	0.191811	0.154113	0.229508
57.3658	0.0796561	33.4172	0.158973	0.116213	0.201732		157.664	0.810508	34.2184	0.191627	0.154188	0.229066
78.3469	0.00271238	33.7892	0.159631	0.117105	0.202157		69.8102	-0.168998	34.6225	0.19153	0.154227	0.228833
96.1845	0.0549131	34.1411	0.160254	0.117949	0.202559		154.57	0.01764	34.9915	0.191442	0.154263	0.22862
118.654	0.112244	34.5093	0.160905	0.118831	0.202979		124.605	0.482094	35.0468	0.191428	0.154268	0.228589
26.399	0.589947	34.8734	0.161549	0.119703	0.203396		13.2615	-0.0993774	35.4554	0.191331	0.154308	0.228353
34.1411	0.505685	35.2461	0.162209	0.120595	0.203823		8.34506	0.0911821	35.7507	0.19126	0.154336	0.228183
65.4193	0.183034	35.2555	0.162226	0.120617	0.203834		85.4295	0.0829245	35.7722	0.191255	0.154339	0.228171
101.907	-0.0176556	35.2595	0.162233	0.120627	0.203838		160.836	0.229221	36.1418	0.191166	0.154374	0.227958
102.325	0.712187	35.6275	0.162884	0.121508	0.20426		164.596	0.707944	36.565	0.191065	0.154415	0.227715
31.2015	-0.0194444	35.986	0.163518	0.122365	0.204672		161.424	0.251707	36.9587	0.19097	0.154452	0.227488
83.4574	0.511767	36.0155	0.16357	0.122435	0.204705		77.7823	0.00281384	37.3532	0.190876	0.15449	0.227262
112.174	0.255538	36.3529	0.164167	0.123242	0.205093		95.301	0.0341866	37.6943	0.190794	0.154522	0.227066
71.2383	0.42323	36.3605	0.164181	0.12326	0.205102		25.7745	0.795897	37.7369	0.190784	0.154526	0.227042
120.416	0.655054	36.3831	0.164221	0.123314	0.205128		33.0701	0.172593	38.1583	0.190683	0.154566	0.2268
34.8734	0.115755	36.7407	0.164854	0.124168	0.205539		132.301	0.369146	38.5721	0.190584	0.154604	0.226563
68.484	0.832655	37.1309	0.165544	0.1251	0.205988		133.532	0.0217554	39.3094	0.190407	0.154673	0.22614
86.3692	-0.0443789	37.4609	0.166128	0.125887	0.206369		102.87	-0.120183	40.068	0.190225	0.154743	0.225707
84.3146	0.125444	37.8506	0.166817	0.126816	0.206818		30.7836	-0.0458644	40.4307	0.190138	0.154777	0.225499
70.8428	0.514271	37.8554	0.166826	0.126828	0.206824		92.3552	0.334642	40.8194	0.190045	0.154812	0.225278
120.017	0.180491	38.203	0.167441	0.127656	0.207225		177.733	0.0418358	41.5943	0.189859	0.154883	0.224836
88.7672	0.114308	38.2239	0.167478	0.127706	0.20725		124.054	0.823383	41.9933	0.189764	0.154919	0.224608
81.052	0.13431	38.241	0.167508	0.127747	0.207269		112.556	0.0882671	43.2692	0.189458	0.155033	0.223883
79.463	0.837543	38.984	0.168823	0.129516	0.208129		119.744	0.823021	43.6555	0.189365	0.155067	0.223663
88.7672	0.0668268	39.3404	0.169453	0.130364	0.208542		67.2746	0.597689	44.3779	0.189192	0.15513	0.223254
99.402	0.492073	39.7044	0.170098	0.13123	0.208965		85.4963	-0.0997015	44.7604	0.1891	0.155164	0.223037
94.8336	0.0272449	39.7148	0.170116	0.131255	0.208977		83.1368	0.195222	45.1525	0.189006	0.155198	0.222815
90.7369	0.86399	40.0574	0.170722	0.132069	0.209375		69.4546	0.411482	45.2588	0.188981	0.155207	0.222755
87.4819	0.380082	40.43	0.171382	0.132954	0.209809		12.5048	0.015691	45.9451	0.188816	0.155266	0.222367
90.3465	0.641595	41.5481	0.17336	0.135606	0.211113		21.2155	0.864191	46.7959	0.188613	0.155338	0.221887
96.8968	0.125714	41.5505	0.173364	0.135612	0.211116		130.619	-0.0444493	47.125	0.188534	0.155366	0.221701
102.795	0.128272	41.5536	0.17337	0.135619	0.21112		178.397	0.407716	48.3767	0.188234	0.15547	0.220997
101.146	0.102958	41.9167	0.174012	0.13648	0.211545		167.279	0.110631	48.3922	0.18823	0.155471	0.220989
60.7768	0.316043	42.2926	0.174677	0.137369	0.211985		176.527	0.0570679	48.7843	0.188136	0.155503	0.220768
107.015	0.260974	43.0345	0.17599	0.139124	0.212856		88.1928	0.123713	49.2301	0.188029	0.15554	0.220518
108.301	-0.0621094	43.0403	0.176	0.139138	0.212863		80.3255	0.113252	49.5465	0.187953	0.155566	0.220341
99.8163	-0.0440893	43.4078	0.176651	0.140006	0.213295		78.5473	0.821152	50.0137	0.187841	0.155603	0.220079
93.2874	-0.104959	43.4118	0.176658	0.140015	0.2133		88.1928	-0.0126464	50.3741	0.187755	0.155632	0.219878
129.9	0.105072	44.201	0.178054	0.141877	0.214231		97.5052	0.258523	50.7259	0.187671	0.15566	0.219681
124.418	0.825719	44.9078	0.179305	0.143543	0.215067		140.321	0.185471	50.7839	0.187657	0.155665	0.219649
12.833	0.291843	44.9161	0.179319	0.143562	0.215076		94.6328	0.0527098	51.1264	0.187575	0.155692	0.219458
16.5005	0.24524	44.9575	0.179393	0.14366	0.215125		89.0256	0.767526	51.5358	0.187476	0.155724	0.219229
124.037	0.290131	45.2799	0.179963	0.144418	0.215508		114.703	-0.0737767	51.9364	0.18738	0.155755	0.219006
101.515	0.034897	45.6522	0.180622	0.145294	0.21595		86.6851	0.381841	52.4556	0.187256	0.155795	0.218717
91.9655	0.306203	46.0213	0.181275	0.146161	0.216389		76.3753	0.740968	52.7445	0.187187	0.155817	0.218557
86.677	0.78626	46.0249	0.181281	0.146169	0.216393		122.975	0.085568	52.7688	0.187181	0.155819	0.218543
52.7869	0.842799	46.0463	0.181319	0.14622	0.216419		125.184	0.0371177	53.1439	0.187091	0.155847	0.218335
107.044	-0.0506719	46.0763	0.181372	0.14629	0.216454		175.192	-0.112576	53.2454	0.187067	0.155855	0.218278
68.484	0.0457292	46.7764	0.182611	0.147933	0.217289		103.509	0.163156	53.6415	0.186972	0.155885	0.218059
90.7698	0.138982	46.7844	0.182625	0.147952	0.217299		89.6379	0.00406077	54.3667	0.186798	0.155939	0.217657
81.4656	0.0482998	47.1804	0.183326	0.148879	0.217772		102.997	0.0313156	54.4047	0.186789	0.155942	0.217636
33.7892	0.124286	47.5227	0.183932	0.149681	0.218182		113.471	0.00642241	54.4764	0.186772	0.155947	0.217597
63.8376	-0.00457548	47.8934	0.184587	0.150548	0.218627		170.451	0.599513	55.5865	0.186506	0.156028	0.216984
84.2653	0.119018	48.6433	0.185914	0.1523	0.219529		117.253	0.0677804	55.7133	0.186475	0.156037	0.216914
98.5596	0.795582	48.6819	0.185983	0.15239	0.219576		100.422	-0.0792899	56.0127	0.186403	0.156058	0.216749
100.226	0.260537	49.4196	0.187288	0.154109	0.220467		93.398	-0.0691291	56.8227	0.186209	0.156115	0.216303
75.9127	0.0211254	49.4263	0.1873	0.154125	0.220475		143.2	0.773518	57.6527	0.18601	0.156173	0.215848
75.9127	0.765882	49.4337	0.187313	0.154142	0.220484		133.467	0.0931188	57.6776	0.186004	0.156174	0.215835
66.9474	0.0726624	50.1563	0.188591	0.155823	0.22136		123.486	0.0207158	58.1335	0.185895	0.156205	0.215585
102.782	0.00741551	50.1948	0.18866	0.155913	0.221407		12.5048	0.286867	59.0057	0.185686	0.156263	0.215109
117.841	-0.0439717	50.5347	0.189261	0.156702	0.22182		16.299	0.232525	59.7104	0.185517	0.15631	0.214725
101.902	0.705985	51.2881	0.190594	0.158449	0.222739		51.9364	0.866042	59.7672	0.185504	0.156313	0.214694
102.795	0.0996435	51.654	0.191242	0.159297	0.223187		150.935	0.126657	59.7873	0.185499	0.156314	0.214683
94.8336	0.279807	51.6791	0.191286	0.159355	0.223217		171.742	0.476222	60.1059	0.185422	0.156335	0.21451
89.9665	0.115571	52.0304	0.191908	0.160167	0.223648		179.081	0.227241	60.1202	0.185419	0.156336	0.214502
79.4602	-0.0833012	52.434	0.192622	0.161099	0.224144		67.2746	0.0411235	60.5216	0.185323	0.156361	0.214284
132.134	0.208588	52.7869	0.193246	0.161913	0.224579		89.9752	0.160936	60.5312	0.18532	0.156362	0.214279
92.3857	0.0283396	52.7972	0.193264	0.161937	0.224591		80.8073	0.107803	61.0692	0.185192	0.156396	0.213987
21.9945	0.14234	53.2144	0.194003	0.162899	0.225107		33.1059	0.113503	61.8053	0.185015	0.156441	0.213589
88.3177	0.76186	53.2244	0.19402	0.162921	0.225119		127.88	0.0282418	62.2299	0.184913	0.156466	0.21336
120.857	0.821486	53.5408	0.19458	0.16365	0.225511		190.892	0.0582073	62.2646	0.184905	0.156469	0.213341
75.5861	0.0194547	53.5977	0.194681	0.163781	0.225581		58.1335	0.00893882	62.3354	0.184888	0.156473	0.213303
92.0307	0.0573149	53.9219	0.195254	0.164526	0.225983		75.1954	-0.0478242	62.7158	0.184797	0.156495	0.213098
95.248	0.269332	53.9537	0.195311	0.164599	0.226023		63.0327	-0.0035719	63.0327	0.184721	0.156514	0.212928
100.237	0.544183	54.3454	0.196004	0.165498	0.22651		171.821	0.145801	63.0415	0.184719	0.156514	0.212923
136.71	0.224531	54.3553	0.196021	0.16552	0.226522		74.6028	0.680288	63.4559	0.184619	0.156538	0.212701
122.184	0.866903	54.6753	0.196587	0.166254	0.226921		65.5926	0.120152	63.4661	0.184617	0.156539	0.212695
91.587	0.370344	54.6766	0.19659	0.166257	0.226923		103.419	-0.0330451	63.5118	0.184606	0.156542	0.212671
87.0759	0.335981	55.1037	0.197346	0.167235	0.227457		89.6028	-0.106682	63.8613	0.184522	0.156561	0.212483
127.595	0.188418	55.5101	0.198065	0.168164	0.227966		147.907	0.129265	63.9637	0.184498	0.156567	0.212428
114.282	0.805869	55.8148	0.198604	0.168859	0.228349		150.34	-0.0089401	65.1494	0.184214	0.156632	0.211795
130.279	0.704643	55.873	0.198707	0.168992	0.228422		108.025	0.112318	65.5926	0.184107	0.156656	0.211559
115.167	0.757065	55.8841	0.198727	0.169017	0.228436		100.414	0.697858	65.971	0.184017	0.156676	0.211358
123.982	0.796533	56.1932	0.199273	0.169722	0.228825		102.997	0.0206386	66.0082	0.184008	0.156678	0.211338
70.0337	0.347214	56.2082	0.1993	0.169756	0.228844		89.5197	0.110714	66.3915	0.183916	0.156697	0.211134
105.816	0.210245	56.2585	0.199389	0.169871	0.228907		154.015	-0.00739397	66.8161	0.183814	0.156719	0.210909
131.178	0.566596	56.574	0.199947	0.170589	0.229306		160.836	0.198473	67.2746	0.183704	0.156741	0.210667
96.0794	0.716449	56.5853	0.199967	0.170614	0.22932		182.595	0.193509	67.6748	0.183608	0.156761	0.210456
112.209	0.170688	56.9586	0.200628	0.171463	0.229793		103.903	0.10885	67.683	0.183606	0.156761	0.210451
177.993	0.6794	57.0085	0.200716	0.171576	0.229856		21.2155	0.216396	67.694	0.183604	0.156762	0.210446
108.261	0.859623	57.3658	0.201348	0.172387	0.23031		185.221	0.470334	67.724	0.183597	0.156763	0.21043
120.412	0.436275	57.3945	0.201399	0.172452	0.230346		153.45	-0.00678108	68.5226	0.183405	0.156801	0.21001
93.6128	0.382898	57.7117	0.20196	0.17317	0.23075		172.499	0.186631	68.5365	0.183402	0.156801	0.210002
126.709	0.607974	57.7121	0.201961	0.173171	0.230751		157.751	0.0659796	68.5476	0.183399	0.156802	0.209997
165.167	0.855688	57.7194	0.201974	0.173188	0.23076		168.538	0.182436	68.9597	0.1833	0.15682	0.20978
99.8309	0.708826	57.7237	0.201982	0.173197	0.230766		181.126	0.706989	69.0603	0.183276	0.156825	0.209728
131.198	0.793343	58.0924	0.202634	0.174032	0.231236		33.0774	0.0901736	69.4546	0.183182	0.156842	0.209521
87.4914	0.650177	58.4855	0.203329	0.174919	0.23174		20.8461	0.370129	69.5306	0.183164	0.156846	0.209481
131.649	0.773269	58.8822	0.204031	0.175814	0.232249		86.2225	0.201983	69.8102	0.183097	0.156858	0.209335
57.0085	0.349553	59.2438	0.204671	0.176627	0.232715		151.575	0.0325681	69.8173	0.183095	0.156858	0.209332
87.1452	0.36956	59.2483	0.204679	0.176637	0.232721		154.676	0.279845	69.8952	0.183076	0.156861	0.209291
83.8746	0.648305	59.2538	0.204689	0.17665	0.232728		148.526	0.817576	70.6705	0.18289	0.156893	0.208887
124.868	0.78841	59.3076	0.204784	0.176771	0.232798		68.5476	0.0521036	70.6777	0.182889	0.156894	0.208884
68.8911	0.485252	60.7722	0.207376	0.180051	0.2347		155.311	0.0406107	70.7567	0.18287	0.156897	0.208842
128.46	0.811264	60.7768	0.207384	0.180062	0.234706		135.673	0.86682	71.0992	0.182788	0.15691	0.208665
73.9646	0.357989	60.7768	0.207384	0.180062	0.234706		168.509	0.834089	71.1397	0.182778	0.156912	0.208644
47.1804	-0.022738	60.7892	0.207406	0.180089	0.234722		171.184	0.142958	71.5512	0.182679	0.156928	0.208431
50.5347	0.0537603	60.8057	0.207435	0.180126	0.234743		185.2	0.195788	71.6734	0.18265	0.156933	0.208367
57.7194	0.448414	61.1467	0.208038	0.180887	0.23519		83.0701	0.385033	72.0048	0.182571	0.156945	0.208196
58.4855	-0.00347139	61.1571	0.208057	0.18091	0.235204		188.021	0.722875	72.3954	0.182477	0.156959	0.207995
23.8471	-0.110979	61.1758	0.20809	0.180951	0.235228		160.221	-0.158031	72.447	0.182465	0.156961	0.207968
46.0213	0.29673	61.5301	0.208717	0.18174	0.235693		126.765	0.641888	72.4662	0.18246	0.156962	0.207958
42.2926	-0.0924545	61.5484	0.208749	0.181781	0.235717		121.877	-0.0822503	72.8729	0.182362	0.156976	0.207749
47.5227	-0.113668	61.9129	0.209394	0.18259	0.236198		171.742	0.0037599	72.9353	0.182348	0.156978	0.207717
102.771	0.0651941	61.9234	0.209413	0.182613	0.236212		173.753	0.00106916	73.3002	0.18226	0.15699	0.20753
105.281	0.815313	62.301	0.210081	0.18345	0.236711		173.08	0.0709357	73.7289	0.182157	0.157004	0.20731
79.8792	-0.0614415	62.3222	0.210118	0.183497	0.236739		46.7959	0.0707678	73.8342	0.182132	0.157008	0.207256
91.6136	0.0638978	62.3493	0.210166	0.183557	0.236775		49.5465	0.0830627	74.209	0.182042	0.157019	0.207065
75.9733	-0.0778878	62.3727	0.210208	0.183609	0.236806		51.5358	0.0602741	74.318	0.182016	0.157023	0.20701
85.4616	-0.0398647	62.6833	0.210757	0.184296	0.237218		56.8227	0.193714	74.6028	0.181948	0.157031	0.206865
71.1971	0.770077	62.7282	0.210837	0.184395	0.237278		57.6527	-0.0467206	74.618	0.181944	0.157032	0.206857
116.519	-0.0476289	62.7282	0.210837	0.184395	0.237278		99.5509	0.0970162	74.7399	0.181915	0.157035	0.206795
75.1596	-0.0802745	63.0904	0.211477	0.185194	0.237761		93.6833	0.830456	75.1954	0.181806	0.157048	0.206564
36.3529	0.0501238	63.0904	0.211477	0.185194	0.237761		23.536	-0.0875137	75.4488	0.181745	0.157055	0.206435
31.9186	0.174778	63.1416	0.211568	0.185307	0.237829		108.551	-0.0206299	75.4581	0.181743	0.157055	0.20643
55.873	0.0130228	63.4548	0.212122	0.185997	0.238248		113.504	-0.0990755	75.5877	0.181712	0.157059	0.206365
39.7044	0.518068	63.4711	0.212151	0.186033	0.23827		162.689	0.717123	75.5877	0.181712	0.157059	0.206365
89.9347	-0.0606494	63.8376	0.2128	0.186838	0.238761		166.525	-0.0286399	76.0137	0.18161	0.15707	0.20615
92.3681	-0.0893122	63.8771	0.212869	0.186924	0.238814		41.9933	-0.0777803	76.0137	0.18161	0.15707	0.20615
99.882	-0.0199334	64.2243	0.213484	0.187686	0.239282		159.683	-0.0287316	76.3753	0.181523	0.157079	0.205967
107.399	0.699545	64.2287	0.213492	0.187695	0.239288		172.409	0.545849	77.2112	0.181323	0.157098	0.205548
116.074	-0.0524229	64.2342	0.213501	0.187707	0.239295		177.706	-0.00239963	77.2776	0.181307	0.157099	0.205515
100.347	0.0172053	64.2574	0.213542	0.187758	0.239327		126.835	0.0371308	77.2998	0.181301	0.157099	0.205504
128.053	0.0487119	64.6032	0.214154	0.188514	0.239794		69.8173	0.753076	77.2998	0.181301	0.157099	0.205504
135.306	0.796714	64.6115	0.214169	0.188532	0.239806		147.447	0.109031	77.6676	0.181213	0.157107	0.20532
97.7282	0.604852	64.6582	0.214252	0.188634	0.239869		155.798	0.641445	77.7823	0.181186	0.157109	0.205262
89.9665	0.0929645	65.0049	0.214865	0.189391	0.240339		158.292	0.0874742	78.1868	0.181089	0.157117	0.205061
99.402	0.394767	65.0497	0.214944	0.189488	0.2404		121.887	0.624216	78.5473	0.181002	0.157123	0.204882
106.549	0.831822	65.3877	0.215542	0.190224	0.240861		152.125	-0.0208809	78.9959	0.180895	0.15713	0.20466
130.726	0.719455	65.3939	0.215553	0.190237	0.24087		158.391	-0.0525966	79.077	0.180876	0.157132	0.204619
118.659	0.0316757	65.4193	0.215598	0.190292	0.240904		140.254	0.772562	79.1321	0.180862	0.157132	0.204592
101.102	-0.0236753	65.4193	0.215598	0.190292	0.240904		149.846	0.0521922	79.438	0.180789	0.157137	0.204441
63.0904	0.0987982	66.16	0.216909	0.191898	0.24192		146.767	0.0368788	79.4723	0.180781	0.157137	0.204424
34.5093	0.566875	66.1823	0.216948	0.191946	0.24195		151.605	-0.0662902	80.0262	0.180648	0.157144	0.204152
91.9805	0.00171537	66.2281	0.217029	0.192045	0.242013		145.034	-0.0532656	80.3255	0.180576	0.157148	0.204005
71.9757	0.240634	66.9399	0.218289	0.19358	0.242998		36.1418	-0.00393474	80.7941	0.180464	0.157152	0.203776
68.8611	0.0631535	66.9474	0.218302	0.193596	0.243008		31.5151	-0.0395457	80.8073	0.180461	0.157152	0.203769
70.0245	0.49002	66.9561	0.218318	0.193615	0.24302		43.2692	-0.156416	80.8439	0.180452	0.157153	0.203751
100.652	0.066536	66.966	0.218335	0.193636	0.243034		147.919	-0.00142031	82.1301	0.180144	0.157161	0.203127
89.9959	0.0176021	67.3062	0.218937	0.194367	0.243507		44.3779	0.275383	82.1656	0.180135	0.157161	0.203109
91.2123	-0.0611337	67.3179	0.218958	0.194392	0.243523		169.787	0.650664	83.0701	0.179918	0.157163	0.202674
100.648	0.0550577	67.3308	0.218981	0.19442	0.243541		91.7957	-0.0859125	83.0701	0.179918	0.157163	0.202674
100.677	-0.0115415	67.3483	0.219012	0.194457	0.243566		114.563	-0.104632	83.1368	0.179902	0.157163	0.202642
129.814	0.86234	68.1345	0.220403	0.196139	0.244667		100.559	0.0372124	83.1658	0.179896	0.157163	0.202628
94.0101	0.123138	68.4744	0.221004	0.196862	0.245146		106.353	0.695919	83.6049	0.17979	0.157163	0.202418
96.0864	0.226789	68.484	0.221021	0.196883	0.245159		120.292	0.812765	83.9504	0.179707	0.157162	0.202253
90.3268	-0.0301404	68.4983	0.221046	0.196913	0.24518		121.346	0.0614332	84.8894	0.179482	0.157157	0.201808
90.7369	0.761685	68.5287	0.2211	0.196978	0.245223		162.077	0.416754	85.3064	0.179382	0.157154	0.201611
80.7187	0.188459	68.8611	0.221688	0.197683	0.245693		166.654	-0.00855134	85.3767	0.179366	0.157153	0.201578
105.277	0.312911	68.8755	0.221714	0.197714	0.245714		176.365	0.847084	85.4295	0.179353	0.157153	0.201553
60.7768	0.509936	68.8911	0.221741	0.197747	0.245736		152.768	0.180603	85.4963	0.179337	0.157152	0.201522
65.0497	0.077434	69.2465	0.22237	0.198499	0.246241		139.83	0.0785502	85.7671	0.179272	0.157149	0.201395
56.574	0.306611	69.319	0.222499	0.198653	0.246345		131.255	0.00999489	86.2225	0.179163	0.157144	0.201182
71.1971	0.745184	70.0239	0.223746	0.200137	0.247354		134.552	0.705995	86.379	0.179125	0.157142	0.201109
79.5056	0.0268803	70.0245	0.223747	0.200139	0.247355		131.255	0.0281637	86.6851	0.179052	0.157138	0.200966
63.4711	0.179098	70.0294	0.223756	0.200149	0.247362		96.5398	0.585148	86.694	0.17905	0.157138	0.200962
58.0924	0.14824	70.0337	0.223763	0.200158	0.247368		89.0917	0.0060239	87.1423	0.178942	0.157131	0.200754
54.3454	0.0632274	70.0539	0.223799	0.2002	0.247397		98.9687	0.572163	87.2681	0.178912	0.157129	0.200696
75.9599	0.0321414	70.0735	0.223834	0.200242	0.247425		130.142	0.302618	87.7151	0.178805	0.15712	0.20049
63.0904	0.562674	70.4172	0.224442	0.200962	0.247921		120.292	0.0485582	88.0983	0.178713	0.157113	0.200314
81.0876	0.365679	70.4394	0.224481	0.201009	0.247953		66.8161	0.117541	88.1637	0.178698	0.157111	0.200284
74.3267	0.0300577	70.8428	0.225195	0.201852	0.248538		61.8053	0.0794183	88.1928	0.178691	0.157111	0.200271
92.822	-0.0977901	70.8925	0.225283	0.201955	0.24861		33.4524	0.613834	88.1928	0.178691	0.157111	0.200271
101.069	0.107063	70.8925	0.225283	0.201955	0.24861		149.701	0.0704257	88.6414	0.178583	0.157101	0.200066
128.498	-7.262e-05	71.1971	0.225822	0.20259	0.249054		183.891	0.0905493	89.0256	0.178491	0.157091	0.199891
115.236	-0.0407751	71.2008	0.225828	0.202597	0.249059		143.285	-0.0117984	89.0917	0.178475	0.15709	0.199861
97.7318	0.528666	71.2383	0.225895	0.202675	0.249114		130.113	0.0832084	89.1909	0.178451	0.157087	0.199816
109.578	-0.0562756	71.5861	0.22651	0.203397	0.249623		71.0992	0.0627301	89.5197	0.178373	0.157078	0.199667
99.882	-0.0669636	71.6144	0.22656	0.203456	0.249664		67.6748	0.0587295	89.5714	0.17836	0.157077	0.199644
106.646	0.0768023	71.6238	0.226577	0.203475	0.249678		61.0692	0.119005	89.6028	0.178353	0.157076	0.199629
92.4058	0.0177536	71.9757	0.227199	0.204203	0.250196		68.5226	0.336858	89.6379	0.178344	0.157075	0.199614
95.6632	0.0018717	72.3653	0.227889	0.205006	0.250771		146.744	-0.00556772	89.9195	0.178277	0.157067	0.199487
111.735	0.0300039	72.4061	0.227961	0.20509	0.250832		77.6676	-0.0641608	89.9306	0.178274	0.157067	0.199482
75.1848	0.0387527	72.4169	0.22798	0.205112	0.250848		138.52	0.0333696	89.9752	0.178263	0.157065	0.199462
62.3222	0.371882	72.4424	0.228025	0.205165	0.250886		143.855	0.118317	89.9974	0.178258	0.157065	0.199452
88.2962	0.787539	72.7696	0.228604	0.205837	0.251372		185.905	0.136013	90.4771	0.178143	0.15705	0.199237
64.2342	0.665624	73.149	0.229275	0.206613	0.251938		192.94	0.0118525	90.5723	0.17812	0.157047	0.199194
44.9161	0.476535	73.1541	0.229285	0.206623	0.251946		183.22	0.00480904	91.7957	0.177827	0.157003	0.198651
38.203	0.0513223	73.5599	0.230003	0.20745	0.252555		89.5714	-0.148173	92.279	0.177711	0.156984	0.198439
102.761	0.45097	73.9352	0.230667	0.208212	0.253121		102.938	-0.0510372	92.3552	0.177693	0.15698	0.198406
68.5287	-0.0115505	73.9646	0.230719	0.208272	0.253165		99.4484	0.0988282	92.4523	0.17767	0.156976	0.198363
83.5114	0.344431	73.9744	0.230736	0.208292	0.25318		148.688	0.074164	92.772	0.177593	0.156963	0.198224
46.0763	0.0342848	73.9979	0.230778	0.208339	0.253216		145.609	0.0486241	93.2749	0.177473	0.15694	0.198005
97.3147	0.3813	74.0116	0.230802	0.208367	0.253236		151.521	0.0703644	93.398	0.177443	0.156934	0.197952
68.8755	0.645392	74.3267	0.231359	0.209004	0.253714		136.869	0.129254	93.6833	0.177375	0.15692	0.197829
84.7239	-0.0311043	74.3451	0.231392	0.209041	0.253742		135.127	0.800443	93.8535	0.177334	0.156912	0.197756
115.599	0.519015	74.3622	0.231422	0.209076	0.253768		125.715	0.111342	93.8921	0.177325	0.15691	0.197739
105.761	0.285055	74.742	0.232094	0.209841	0.254348		118.154	0.491143	94.1551	0.177262	0.156897	0.197627
123.532	0.750918	74.7982	0.232194	0.209954	0.254433		161.594	0.0596383	94.1707	0.177258	0.156896	0.19762
55.8148	0.179565	75.1157	0.232755	0.210591	0.25492		112.06	-0.0915656	94.1843	0.177255	0.156895	0.197614
57.7117	0.0626091	75.1316	0.232784	0.210622	0.254945		170.451	0.590019	94.2484	0.177239	0.156892	0.197587
94.8612	0.289934	75.1489	0.232814	0.210657	0.254971		177.787	0.158084	94.6328	0.177147	0.156872	0.197423
88.2922	0.795116	75.1596	0.232833	0.210678	0.254988		190.856	0.185235	94.6328	0.177147	0.156872	0.197423
36.7407	-0.0273229	75.1848	0.232878	0.210729	0.255027		157.113	-0.0391015	94.6524	0.177142	0.156871	0.197414
46.7764	0.756928	75.1995	0.232904	0.210758	0.255049		145.58	0.398005	95.1066	0.177034	0.156845	0.197222
137.168	0.645835	75.5078	0.233449	0.211374	0.255524		137.406	0.769641	95.301	0.176987	0.156834	0.19714
108.268	-0.000648347	75.548	0.23352	0.211454	0.255586		154.761	0.0532758	95.5863	0.176919	0.156818	0.19702
111.261	0.796716	75.5861	0.233588	0.21153	0.255645		146.117	0.528183	95.6929	0.176893	0.156811	0.196975
116.031	0.0590283	75.9033	0.234149	0.212161	0.256137		155.201	0.521588	95.7245	0.176886	0.156809	0.196962
35.986	0.871857	75.9127	0.234166	0.21218	0.256152		94.2484	0.228138	96.0601	0.176805	0.156789	0.196821
137.191	0.334603	75.9599	0.234249	0.212273	0.256225		89.9306	-0.00979191	96.1097	0.176793	0.156786	0.196801
78.6727	0.486027	75.9733	0.234273	0.2123	0.256246		140.837	0.111447	96.2584	0.176758	0.156777	0.196739
127.104	0.555972	75.9881	0.234299	0.212329	0.256269		149.189	0.196506	96.5398	0.17669	0.156759	0.196622
102.754	0.473384	76.3103	0.234869	0.212967	0.256771		135.111	0.141891	96.5796	0.176681	0.156756	0.196605
90.3809	0.217009	76.7264	0.235605	0.213788	0.257423		166.654	0.144939	96.6514	0.176663	0.156751	0.196575
105.362	0.0409868	76.7495	0.235646	0.213833	0.257459		95.7245	0.129677	97.0275	0.176573	0.156726	0.19642
101.92	0.63221	77.094	0.236256	0.21451	0.258002		96.5796	-0.0482317	97.1176	0.176552	0.15672	0.196383
38.984	0.419194	77.4827	0.236944	0.215269	0.258618		144.461	0.0605212	97.5012	0.17646	0.156694	0.196226
94.0486	0.0459604	77.5171	0.237005	0.215337	0.258673		69.8173	0.681956	97.5052	0.176459	0.156693	0.196224
86.6731	0.52748	77.874	0.237636	0.216031	0.259241		53.2454	0.111031	97.5132	0.176457	0.156693	0.196221
118.654	0.52434	78.2702	0.238337	0.216798	0.259876		173.139	0.260431	98.0557	0.176327	0.156654	0.196
124.493	0.211802	78.3093	0.238406	0.216874	0.259938		75.5877	-0.116823	98.0819	0.17632	0.156652	0.195989
110.874	0.179575	78.3204	0.238426	0.216896	0.259956		62.2299	0.616683	98.4788	0.176225	0.156622	0.195829
129.419	0.310182	78.3469	0.238473	0.216947	0.259999		142.681	0.176966	98.491	0.176222	0.156621	0.195824
134.844	0.369508	78.6727	0.239049	0.217575	0.260524		54.4047	0.175589	98.9687	0.176108	0.156584	0.195632
120.888	0.547653	78.7232	0.239139	0.217672	0.260606		146.767	0.0994071	99.0238	0.176095	0.156579	0.19561
109.592	0.322764	79.0717	0.239755	0.21834	0.261171		98.0557	0.0380154	99.4484	0.175993	0.156545	0.195441
50.1563	0.0693923	79.0929	0.239793	0.218381	0.261205		115.702	0.0515276	99.4607	0.17599	0.156544	0.195436
37.1309	0.0820418	79.1141	0.23983	0.218421	0.261239		100.972	0.100108	99.4976	0.175981	0.156541	0.195421
55.8841	0.095817	79.4602	0.240443	0.219082	0.261803		127.862	-0.0328102	99.5509	0.175968	0.156536	0.1954
105.287	0.733948	79.463	0.240448	0.219087	0.261808		112.454	0.186928	99.5838	0.175961	0.156534	0.195387
101.13	0.230559	79.4666	0.240454	0.219094	0.261814		166.032	0.104981	100.054	0.175848	0.156494	0.195202
110.4	0.383331	79.5056	0.240523	0.219168	0.261878		165.368	0.0859932	100.089	0.175839	0.156491	0.195188
121.387	0.0791756	79.5177	0.240544	0.219191	0.261897		73.8342	0.0291244	100.414	0.175762	0.156462	0.195061
36.3605	0.399032	79.862	0.241154	0.219846	0.262462		173.226	0.0155492	100.422	0.17576	0.156462	0.195057
131.637	0.854746	79.8792	0.241184	0.219878	0.26249		164.089	0.0383217	100.422	0.17576	0.156462	0.195057
85.9256	0.131773	80.2618	0.241861	0.220601	0.263121		166.583	0.299201	100.472	0.175748	0.156457	0.195038
96.4965	0.451885	80.2733	0.241881	0.220623	0.26314		59.7873	0.122155	100.559	0.175727	0.15645	0.195004
91.1842	0.594589	80.2812	0.241895	0.220638	0.263153		158.292	0.756182	100.9	0.175645	0.156419	0.194872
103.587	0.0904601	80.684	0.242608	0.221395	0.263821		62.7158	0.221197	100.972	0.175628	0.156412	0.194843
124.859	0.334604	80.7187	0.242669	0.22146	0.263879		138.526	0.261312	101.412	0.175522	0.156371	0.194674
129.38	0.069479	80.7331	0.242695	0.221487	0.263903		143.2	0.0908509	101.475	0.175507	0.156365	0.194649
118.719	0.407089	80.749	0.242723	0.221517	0.263929		174.364	0.513201	101.538	0.175492	0.156359	0.194625
132.15	0.364179	81.052	0.243259	0.222084	0.264434		118.161	0.0620046	101.575	0.175483	0.156355	0.194611
85.0764	0.313651	81.0876	0.243322	0.22215	0.264494		171.148	0.332928	101.93	0.175398	0.156321	0.194476
89.1041	0.044563	81.0876	0.243322	0.22215	0.264494		155.948	-0.0136634	102.012	0.175379	0.156313	0.194444
54.6766	0.862041	81.4554	0.243973	0.222835	0.265111		127.841	-0.0140939	102.047	0.17537	0.156309	0.194431
51.654	0.0939462	81.4656	0.243991	0.222854	0.265128		159.608	-0.138428	102.433	0.175278	0.156271	0.194285
71.5861	0.613741	81.8508	0.244673	0.223568	0.265778		37.6943	0.0542017	102.521	0.175257	0.156262	0.194251
88.7527	0.202096	82.6764	0.246133	0.225085	0.267182		181.106	0.161922	102.87	0.175173	0.156225	0.19412
79.4666	0.842324	83.0516	0.246798	0.225769	0.267826		103.903	-0.0441629	102.938	0.175157	0.156218	0.194095
96.5387	0.0691513	83.1039	0.24689	0.225864	0.267916		97.0275	-0.0454047	102.997	0.175142	0.156212	0.194073
74.3451	0.726675	83.4574	0.247516	0.226504	0.268527		127.862	0.0726346	103.419	0.175041	0.156167	0.193916
114.386	0.111232	83.5114	0.247611	0.226602	0.26862		175.192	0.0936571	103.475	0.175028	0.156161	0.193895
71.2383	0.513285	83.8519	0.248214	0.227216	0.269212		45.2588	0.0514403	103.509	0.17502	0.156157	0.193882
109.124	0.810726	83.861	0.24823	0.227232	0.269227		25.8293	0.194638	103.903	0.174925	0.156114	0.193737
131.189	0.63807	83.8746	0.248254	0.227256	0.269251		35.7507	0.147308	104.389	0.174809	0.156059	0.193559
94.831	0.14391	83.9063	0.24831	0.227313	0.269306		171.118	0.0689846	104.466	0.17479	0.15605	0.193531
86.3692	0.0322254	83.9349	0.24836	0.227365	0.269356		161.455	0.0632418	104.844	0.1747	0.156005	0.193394
62.3493	0.193815	84.2653	0.248945	0.227957	0.269933		176.375	0.548135	104.861	0.174696	0.156003	0.193388
62.301	0.714323	84.2722	0.248957	0.227969	0.269945		170.431	0.0633474	105.345	0.17458	0.155945	0.193214
61.1571	0.15025	84.3018	0.24901	0.228022	0.269997		176.527	-0.0772741	105.946	0.174436	0.155871	0.193001
109.99	0.578005	84.3146	0.249032	0.228045	0.27002		54.3667	0.176666	106.015	0.174419	0.155862	0.192976
98.1641	0.359518	84.6568	0.249638	0.228655	0.270621		92.279	0.544687	106.353	0.174338	0.155819	0.192858
107.435	0.130315	84.6644	0.249651	0.228668	0.270634		36.565	0.0611999	106.366	0.174335	0.155817	0.192853
33.3944	0.77071	84.6705	0.249662	0.228679	0.270645		45.9451	0.767236	107.343	0.174101	0.155687	0.192514
118.689	0.179872	84.6979	0.249711	0.228728	0.270693		153.489	0.0612499	107.901	0.173967	0.15561	0.192324
65.3939	0.0346421	84.7239	0.249756	0.228774	0.270739		143.935	0.0698209	107.954	0.173954	0.155602	0.192306
44.9575	0.0725751	85.0642	0.250359	0.229377	0.27134		183.304	0.110555	108.025	0.173937	0.155592	0.192282
103.277	0.176933	85.0764	0.25038	0.229399	0.271362		162.721	0.715649	108.377	0.173853	0.155542	0.192164
95.3209	0.0302185	85.4616	0.251062	0.230078	0.272046		79.1321	0.157904	108.551	0.173811	0.155517	0.192106
75.9881	0.0958139	85.4924	0.251116	0.230132	0.2721		117.626	0.00794399	108.936	0.173719	0.15546	0.191978
105.316	0.598821	85.5294	0.251182	0.230197	0.272166		124.13	0.299765	109.489	0.173587	0.155377	0.191796
100.237	-0.136148	85.8636	0.251773	0.230783	0.272763		109.872	0.85925	109.872	0.173495	0.155318	0.191671
110.906	0.0296646	85.8822	0.251806	0.230815	0.272797		176.362	0.364952	110.38	0.173373	0.155238	0.191508
84.6644	-0.105522	85.9256	0.251883	0.230891	0.272874		34.9915	0.797038	110.584	0.173324	0.155206	0.191443
87.0743	0.757033	85.9566	0.251938	0.230945	0.27293		158.329	0.196675	111.001	0.173224	0.155138	0.19131
26.766	-0.113193	86.2898	0.252527	0.231526	0.273529		165.368	0.192859	111.405	0.173127	0.155071	0.191184
25.6626	0.0353839	86.31	0.252563	0.231561	0.273565		160.177	0.17135	111.529	0.173098	0.15505	0.191145
20.1613	0.460585	86.3692	0.252668	0.231664	0.273672		148.066	0.066173	111.915	0.173005	0.154984	0.191026
13.932	0.843542	86.6731	0.253205	0.23219	0.274221		176.446	0.0822385	112.06	0.17297	0.15496	0.190981
21.9981	0.193686	86.677	0.253212	0.232197	0.274228		136.237	-0.0164029	112.431	0.172881	0.154895	0.190868
35.6275	0.0824863	87.0743	0.253915	0.232881	0.27495		176.483	0.212088	112.454	0.172876	0.154891	0.190861
22.7339	0.0547356	87.0759	0.253918	0.232884	0.274952		38.1583	0.224172	112.556	0.172851	0.154873	0.19083
27.8677	0.477047	87.0838	0.253932	0.232898	0.274967		93.2749	0.0592281	113.089	0.172724	0.154778	0.19067
88.7046	-0.015554	87.1074	0.253974	0.232938	0.27501		85.7671	0.439991	113.471	0.172632	0.154708	0.190556
75.1316	0.00967378	87.1452	0.254041	0.233003	0.275078		113.089	0.127786	113.504	0.172624	0.154702	0.190546
73.1541	-0.0467168	87.4819	0.254636	0.23358	0.275693		108.377	0.0901533	113.527	0.172619	0.154698	0.190539
100.347	-0.0691707	87.4858	0.254643	0.233586	0.275701		127.862	0.773973	113.625	0.172595	0.15468	0.190511
24.1976	-0.0247139	87.4914	0.254653	0.233596	0.275711		135.127	0.16454	113.983	0.172509	0.154613	0.190406
23.4622	0.781274	87.5428	0.254744	0.233684	0.275805		125.776	0.113804	114.563	0.17237	0.154503	0.190238
129.822	0.76815	87.9554	0.255474	0.234386	0.276563		101.538	0.200571	114.591	0.172364	0.154497	0.19023
99.0834	-0.152707	87.9554	0.255474	0.234386	0.276563		131.718	0.133235	114.661	0.172347	0.154484	0.19021
107.826	-0.117759	88.2922	0.25607	0.234956	0.277185		175.081	0.154415	114.703	0.172337	0.154476	0.190198
117.431	-0.0481849	88.2962	0.256077	0.234962	0.277192		35.7722	0.264386	115.032	0.172258	0.154411	0.190104
109.108	-0.11266	88.3177	0.256116	0.234999	0.277232		49.2301	-0.041826	115.049	0.172254	0.154408	0.1901
45.2799	-0.0716654	88.3537	0.256179	0.23506	0.277299		137.39	0.116128	115.579	0.172127	0.154303	0.189951
46.7844	0.686107	88.3857	0.256236	0.235113	0.277358		159.58	0.336054	115.631	0.172114	0.154292	0.189936
88.3857	0.0162856	88.7046	0.2568	0.23565	0.27795		74.7399	0.0341628	115.702	0.172097	0.154278	0.189917
100.237	0.717237	88.7527	0.256885	0.235731	0.27804		135.127	0.753914	116.624	0.171876	0.154089	0.189664
89.5076	0.342387	88.7672	0.256911	0.235755	0.278067		173.106	0.538965	116.677	0.171864	0.154078	0.18965
99.8665	0.268282	88.7833	0.256939	0.235782	0.278097		53.1439	0.815145	117.186	0.171742	0.15397	0.189514
101.102	0.0541645	89.1041	0.257507	0.236319	0.278695		50.7259	0.143805	117.253	0.171726	0.153955	0.189496
71.5861	-0.0560086	89.1299	0.257553	0.236362	0.278744		159.533	0.15728	117.294	0.171716	0.153947	0.189485
52.7972	0.0548266	89.1662	0.257617	0.236422	0.278812		169.918	0.160784	117.626	0.171636	0.153875	0.189398
77.4827	0.699003	89.5076	0.258221	0.23699	0.279452		160.158	0.283532	117.655	0.171629	0.153868	0.18939
98.2501	-0.0959925	89.9144	0.258941	0.237663	0.280219		185.905	0.583613	118.154	0.17151	0.153759	0.189261
115.682	-0.0547846	89.9347	0.258977	0.237696	0.280257		180.408	0.4675	118.161	0.171508	0.153757	0.189259
54.6753	0.807296	89.9437	0.258993	0.237711	0.280274		191.619	0.11649	118.174	0.171505	0.153754	0.189256
73.9979	-0.0474091	89.9543	0.259011	0.237729	0.280294		70.6705	0.404337	118.27	0.171482	0.153733	0.189231
130.759	0.429097	89.9665	0.259033	0.237749	0.280317		88.1928	0.200345	118.685	0.171382	0.15364	0.189125
130.269	0.618163	89.9959	0.259085	0.237797	0.280373		78.5473	0.847399	118.729	0.171372	0.15363	0.189114
83.9349	-0.0839019	90.3219	0.259662	0.238333	0.280991		73.3002	0.626343	118.816	0.171351	0.15361	0.189092
94.8379	0.369339	90.3268	0.25967	0.238341	0.281		8.34474	0.403259	119.269	0.171242	0.153506	0.188979
99.882	0.0212102	90.3465	0.259705	0.238373	0.281037		69.8952	0.3758	119.364	0.17122	0.153484	0.188955
94.0101	0.199327	90.3809	0.259766	0.23843	0.281103		94.6328	0.173072	119.744	0.171129	0.153395	0.188862
104.441	0.60088	90.3957	0.259792	0.238454	0.281131		60.5312	0.695089	119.744	0.171129	0.153395	0.188862
101.063	-0.0168399	90.7295	0.260383	0.238999	0.281767		171.078	0.66292	119.915	0.171088	0.153355	0.18882
91.666	0.0139199	90.7369	0.260396	0.239011	0.281781		156.423	-0.00212858	120.292	0.170997	0.153265	0.188729
100.645	0.0733019	90.7369	0.260396	0.239011	0.281781		149.159	0.741251	120.39	0.170974	0.153242	0.188706
59.2438	0.083382	90.7698	0.260454	0.239065	0.281844		179.795	0.0126405	120.39	0.170974	0.153242	0.188706
48.6819	-0.00349099	91.1428	0.261114	0.239671	0.282558		33.0511	0.800851	120.427	0.170965	0.153233	0.188697
49.4263	0.100077	91.1627	0.261149	0.239703	0.282596		147.409	0.346701	120.941	0.170842	0.153108	0.188575
100.226	0.776414	91.1627	0.261149	0.239703	0.282596		135.705	-0.00963431	121.346	0.170745	0.153008	0.188481
111.711	0.520081	91.1842	0.261188	0.239738	0.282637		164.596	0.339127	121.346	0.170745	0.153008	0.188481
68.4744	0.0893315	91.2123	0.261237	0.239784	0.282691		168.509	-0.00143145	121.358	0.170742	0.153005	0.188478
61.5484	0.356478	91.5471	0.26183	0.240324	0.283335		118.816	-0.0301707	121.877	0.170617	0.152875	0.18836
73.5599	-0.0374616	91.587	0.2619	0.240388	0.283412		202.456	-0.0039812	121.887	0.170615	0.152873	0.188357
131.255	0.211787	91.6136	0.261947	0.240431	0.283463		163.473	0.286994	121.921	0.170607	0.152864	0.18835
65.0049	0.636141	91.666	0.26204	0.240515	0.283565		110.584	-0.0944543	122.407	0.17049	0.15274	0.188241
109.157	-0.0102646	91.9555	0.262552	0.24098	0.284124		152.75	0.844813	122.95	0.17036	0.152599	0.188121
63.8771	0.048307	91.9655	0.26257	0.240996	0.284144		144.956	-0.110263	122.975	0.170354	0.152593	0.188116
96.0689	0.365883	91.9722	0.262582	0.241007	0.284157		137.456	0.170007	123.486	0.170232	0.152458	0.188006
102.795	0.138393	91.9805	0.262597	0.24102	0.284173		195.768	0.0801361	123.574	0.170211	0.152435	0.187987
90.7369	0.183011	91.9906	0.262614	0.241036	0.284192		82.1301	-0.00260451	124.054	0.170096	0.152305	0.187886
91.9722	0.57896	92.0307	0.262685	0.2411	0.28427		85.3064	0.788228	124.13	0.170077	0.152285	0.18787
84.6705	0.527676	92.0474	0.262715	0.241127	0.284303		131.226	0.0204154	124.605	0.169964	0.152155	0.187772
35.2595	0.104055	92.3681	0.263282	0.241639	0.284926		155.189	0.00382553	125.138	0.169836	0.152007	0.187664
27.4997	0.466948	92.3857	0.263313	0.241667	0.28496		169.205	0.0468184	125.184	0.169825	0.151995	0.187655
27.8672	-0.0373923	92.4058	0.263349	0.241699	0.284999		135.795	-0.133481	125.661	0.16971	0.15186	0.187561
27.1317	0.872328	92.4327	0.263397	0.241742	0.285052		101.575	-0.121633	125.661	0.16971	0.15186	0.187561
31.1859	0.0384029	92.8102	0.264065	0.242341	0.285789		159.642	-0.0295321	125.715	0.169698	0.151845	0.18755
31.1859	-0.0460633	92.822	0.264085	0.242359	0.285812		113.983	-0.0458453	125.743	0.169691	0.151837	0.187545
86.3692	0.112342	92.8355	0.264109	0.242381	0.285838		72.8729	-0.0315279	125.776	0.169683	0.151827	0.187538
129.9	0.104667	93.1848	0.264727	0.242932	0.286523		70.6777	-0.0563182	125.814	0.169674	0.151817	0.187531
80.684	0.057129	93.1984	0.264751	0.242953	0.28655		76.0137	0.1312	126.197	0.169582	0.151707	0.187457
75.5078	0.819852	93.2874	0.264909	0.243093	0.286725		133.996	0.379331	126.304	0.169556	0.151676	0.187437
44.9078	0.174868	93.6128	0.265485	0.243603	0.287366		132.301	0.744801	126.745	0.169451	0.151548	0.187354
41.9167	0.853989	94.0101	0.266188	0.244223	0.288152		125.138	0.00150263	126.753	0.169449	0.151546	0.187352
61.9234	0.0489273	94.0203	0.266206	0.244239	0.288173		135.76	0.00900742	126.765	0.169446	0.151542	0.18735
72.4424	-0.0444607	94.0374	0.266236	0.244266	0.288206		128.951	0.0223069	126.783	0.169441	0.151537	0.187346
81.0876	0.0410285	94.0486	0.266256	0.244283	0.288229		186.017	0.039404	126.835	0.169429	0.151521	0.187337
70.4394	0.558439	94.0759	0.266304	0.244326	0.288283		119.744	-0.0468004	127.841	0.169188	0.151222	0.187153
91.9906	-0.121145	94.0922	0.266333	0.244351	0.288315		44.7604	0.00101168	127.862	0.169183	0.151216	0.18715
102.355	0.155339	94.4201	0.266913	0.244859	0.288967		161.436	0.124789	127.88	0.169179	0.151211	0.187147
96.4833	0.729172	94.4235	0.266919	0.244865	0.288974		100.054	0.0689711	128.421	0.169049	0.151046	0.187052
74.742	0.676061	94.4545	0.266974	0.244912	0.289036		101.475	0.0748958	128.468	0.169038	0.151032	0.187043
62.7282	-0.0766285	94.513	0.267078	0.245003	0.289152		114.591	0.0488347	128.535	0.169022	0.151011	0.187032
56.2082	0.045758	94.5319	0.267111	0.245032	0.28919		177.702	0.429023	128.577	0.169012	0.150999	0.187025
21.263	0.0176603	94.831	0.26764	0.245493	0.289787		149.159	0.0649189	128.951	0.168922	0.150883	0.186961
123.074	-0.0262551	94.831	0.26764	0.245493	0.289787		135.795	0.015992	128.964	0.168919	0.150879	0.186958
105.403	-0.0157013	94.8336	0.267645	0.245497	0.289793		117.655	0.329887	129.107	0.168884	0.150835	0.186934
94.4201	0.248841	94.8379	0.267653	0.245504	0.289801		122.95	0.0163063	129.546	0.168779	0.150697	0.186861
88.3537	0.104357	94.8517	0.267677	0.245525	0.289829		130.142	0.147978	130.071	0.168653	0.150531	0.186776
83.861	0.745166	94.8612	0.267694	0.24554	0.289848		142.65	0.173156	130.113	0.168643	0.150518	0.186769
88.3537	-0.128358	95.248	0.268378	0.246133	0.290623		52.7688	0.57702	130.142	0.168636	0.150508	0.186765
19.8009	-0.0311621	95.2688	0.268415	0.246165	0.290665		75.4581	0.692478	130.619	0.168522	0.150355	0.186689
66.9561	0.165769	95.3209	0.268507	0.246244	0.29077		80.7941	-0.00249989	130.751	0.16849	0.150312	0.186668
45.6522	0.088688	95.6563	0.269101	0.246755	0.291446		88.0983	0.644112	131.17	0.16839	0.150176	0.186604
91.1627	-0.03983	95.6632	0.269113	0.246766	0.29146		89.5197	-0.0322851	131.226	0.168377	0.150158	0.186596
93.1848	0.0696258	96.0689	0.269831	0.247381	0.29228		175.715	-0.00142311	131.255	0.16837	0.150148	0.186591
38.241	-0.162462	96.0742	0.26984	0.247389	0.292291		119.269	0.210374	131.329	0.168352	0.150124	0.18658
23.4664	-0.125029	96.0794	0.269849	0.247397	0.292301		190.169	0.00831545	131.718	0.168259	0.149995	0.186522
136.69	-0.0212429	96.0864	0.269862	0.247408	0.292316		187.336	0.173927	131.724	0.168257	0.149994	0.186521
37.4609	0.0433412	96.0952	0.269877	0.247421	0.292333		72.9353	0.0335583	131.724	0.168257	0.149994	0.186521
70.4172	0.0954293	96.1845	0.270035	0.247556	0.292514		182.553	0.0066382	131.867	0.168223	0.149946	0.1865
79.5177	0.0295524	96.4824	0.270562	0.248005	0.29312		83.1658	-0.115042	132.28	0.168124	0.149808	0.18644
57.3945	0.141337	96.4833	0.270564	0.248006	0.293121		100.089	-0.0527914	132.301	0.168119	0.149801	0.186437
75.1995	-0.054852	96.4965	0.270587	0.248026	0.293148		104.389	0.453475	132.32	0.168114	0.149795	0.186434
100.277	0.0228419	96.5141	0.270618	0.248053	0.293184		97.5132	0.0712578	132.344	0.168109	0.149787	0.186431
11.7347	0.116755	96.5255	0.270639	0.24807	0.293207		100.9	0.0172343	132.448	0.168084	0.149752	0.186416
15.7631	-0.0536448	96.5387	0.270662	0.24809	0.293234		90.5723	0.0246139	132.855	0.167986	0.149614	0.186359
89.9437	0.456502	96.5889	0.270751	0.248165	0.293336		181.229	-0.0180165	132.988	0.167954	0.149568	0.18634
66.966	0.00952918	96.8968	0.271296	0.248627	0.293964		195.07	0.650856	133.411	0.167853	0.149424	0.186282
56.9586	-0.0853644	96.9145	0.271327	0.248653	0.294001		48.3922	0.116773	133.424	0.16785	0.149419	0.18628
66.1823	-0.0289075	96.9339	0.271361	0.248682	0.29404		48.7843	0.199533	133.467	0.16784	0.149404	0.186275
112.585	0.211386	96.9463	0.271383	0.248701	0.294066		181.188	0.109388	133.467	0.16784	0.149404	0.186275
121.315	0.207276	97.3147	0.272035	0.24925	0.29482		170.431	0.241555	133.532	0.167824	0.149382	0.186266
87.9554	0.0342021	97.3431	0.272085	0.249292	0.294878		128.964	-0.0986659	133.996	0.167713	0.149221	0.186204
94.831	0.53759	97.7282	0.272767	0.249864	0.29567		48.3767	-0.0204413	134.077	0.167693	0.149193	0.186194
89.9543	-0.0345138	97.7318	0.272773	0.249869	0.295677		171.148	-0.047457	134.528	0.167585	0.149035	0.186136
87.5428	-0.0374541	98.1453	0.273505	0.250479	0.29653		136.812	0.677661	134.552	0.167579	0.149026	0.186132
98.9966	0.0662869	98.1641	0.273538	0.250507	0.296569		118.27	0.0346163	134.661	0.167553	0.148988	0.186119
100.265	0.0114172	98.199	0.2736	0.250558	0.296641		126.745	0.345169	135.1	0.167448	0.148832	0.186064
55.873	-0.0321334	98.2313	0.273657	0.250606	0.296708		190.083	0.0264376	135.111	0.167445	0.148828	0.186063
62.6833	0.146186	98.2501	0.27369	0.250634	0.296747		50.3741	0.13413	135.127	0.167442	0.148822	0.186061
70.0539	-0.0803277	98.5596	0.274238	0.251088	0.297388		160.164	-0.0801664	135.247	0.167413	0.14878	0.186046
77.094	0.463932	98.9749	0.274973	0.251694	0.298251		67.6748	0.0941355	135.664	0.167313	0.14863	0.185996
71.2008	0.0437315	98.9776	0.274977	0.251698	0.298257		72.447	0.020447	135.673	0.167311	0.148627	0.185995
79.0929	-0.0309047	98.9966	0.275011	0.251726	0.298296		63.4661	0.745255	135.705	0.167303	0.148615	0.185991
139.02	-0.0590976	99.0644	0.275131	0.251824	0.298438		167.162	0.12174	135.76	0.16729	0.148596	0.185984
73.9352	0.41036	99.0834	0.275165	0.251852	0.298477		125.661	0.793303	135.795	0.167282	0.148583	0.18598
66.2281	-0.0993989	99.402	0.275728	0.252315	0.299142		63.5118	0.0774946	136.237	0.167176	0.148423	0.185929
70.0735	-0.191949	99.402	0.275728	0.252315	0.299142		95.5863	0.496181	136.812	0.167038	0.148212	0.185864
83.9063	-0.0666682	99.4092	0.275741	0.252325	0.299157		90.4771	0.0962221	136.869	0.167024	0.148191	0.185857
71.6144	-0.0651389	99.4292	0.275777	0.252354	0.299199		173.226	0.0848294	136.869	0.167024	0.148191	0.185857
74.3622	0.113306	99.8163	0.276462	0.252913	0.30001		26.5339	0.86563	137.379	0.166902	0.148002	0.185802
87.9554	0.0381308	99.8227	0.276473	0.252923	0.300023		158.967	0.000212961	137.39	0.166899	0.147998	0.185801
99.0644	0.0626316	99.8309	0.276487	0.252934	0.30004		175.694	0.851286	137.406	0.166895	0.147992	0.185799
86.2898	-0.0251902	99.8665	0.27655	0.252986	0.300115		181.852	0.0362457	137.456	0.166884	0.147973	0.185794
73.9979	0.034133	99.882	0.276578	0.253008	0.300147		162.052	0.279031	137.489	0.166876	0.147961	0.18579
65.4193	0.0426552	99.882	0.276578	0.253008	0.300147		152.822	-0.018589	137.527	0.166866	0.147947	0.185786
76.3103	0.188989	100.226	0.277187	0.253503	0.30087		160.158	0.144226	138.52	0.166628	0.147573	0.185684
64.6582	0.047929	100.237	0.277206	0.253518	0.300894		44.7604	0.197583	138.526	0.166627	0.147571	0.185684
93.1984	0.11822	100.265	0.277255	0.253558	0.300952		41.5943	0.874353	138.537	0.166624	0.147566	0.185682
87.0838	0.245609	100.277	0.277277	0.253576	0.300979		59.7104	0.117788	138.554	0.16662	0.14756	0.185681
89.9144	0.404239	100.347	0.277401	0.253676	0.301125		71.6734	-0.0465111	139.12	0.166485	0.147343	0.185626
89.1299	0.4134	100.645	0.277928	0.254102	0.301754		167.907	0.100652	139.14	0.16648	0.147336	0.185624
90.3957	-0.0456086	100.648	0.277933	0.254106	0.301759		131.724	0.12229	139.165	0.166474	0.147326	0.185621
47.8934	-0.0170926	100.652	0.277941	0.254113	0.301769		80.8439	0.0612674	139.232	0.166458	0.147301	0.185615
48.6433	-0.0573927	100.677	0.277985	0.254148	0.301822		118.816	0.056438	139.673	0.166352	0.14713	0.185574
91.5471	0.706052	101.063	0.278667	0.254697	0.302638		178.383	-0.0349922	139.83	0.166315	0.14707	0.18556
97.3431	0.352909	101.069	0.278677	0.254705	0.302649		181.126	0.000761818	140.254	0.166213	0.146904	0.185522
86.31	0.218975	101.102	0.278736	0.254752	0.30272		20.8396	0.032171	140.276	0.166208	0.146895	0.18552
99.4092	0.471791	101.13	0.278785	0.254792	0.302779		158.967	0.0210273	140.321	0.166197	0.146878	0.185516
54.3553	-0.108946	101.146	0.278815	0.254815	0.302814		125.661	-0.0191868	140.43	0.166171	0.146835	0.185506
94.5319	-0.0965872	101.185	0.278883	0.25487	0.302896		129.546	0.00382038	140.837	0.166073	0.146675	0.185471
85.8636	0.043117	101.483	0.27941	0.255292	0.303529		183.148	0.796967	140.865	0.166066	0.146664	0.185469
80.2812	0.431984	101.497	0.279435	0.255312	0.303558		182.519	-0.00621692	140.888	0.166061	0.146655	0.185467
98.9776	0.0407245	101.515	0.279468	0.255338	0.303598		98.491	0.778837	141.415	0.165935	0.146445	0.185424
103.596	0.746408	101.902	0.280151	0.255882	0.30442		88.1637	0.142995	141.415	0.165935	0.146445	0.185424
94.0759	-0.0560226	101.904	0.280155	0.255885	0.304424		93.6833	0.0215441	141.483	0.165918	0.146418	0.185418
91.1627	-0.0103762	101.907	0.280161	0.25589	0.304432		87.7151	0.088384	141.514	0.165911	0.146406	0.185416
94.0203	0.572217	101.92	0.280184	0.255909	0.30446		153.45	0.027648	141.514	0.165911	0.146406	0.185416
101.93	0.0605388	101.93	0.280201	0.255922	0.30448		45.1525	0.0817831	141.593	0.165892	0.146375	0.185409
102.345	0.545632	101.941	0.280221	0.255938	0.304504		128.421	0.723539	141.996	0.165795	0.146213	0.185378
88.7833	0.0170795	101.969	0.28027	0.255977	0.304564		172.462	-0.0712928	142.081	0.165775	0.146179	0.185371
106.231	0.00362533	101.986	0.2803	0.256	0.304599		113.527	-0.127539	142.115	0.165767	0.146165	0.185369
96.5255	0.188251	102.004	0.280333	0.256027	0.304639		99.5838	-0.0658973	142.625	0.165645	0.145959	0.185331
85.4924	0.491758	102.325	0.280901	0.256477	0.305325		141.415	-0.0609044	142.65	0.165639	0.145948	0.185329
127.102	0.838748	102.345	0.280936	0.256504	0.305367		144.976	0.000446332	142.681	0.165631	0.145936	0.185326
53.9537	-0.0229141	102.355	0.280954	0.256519	0.305389		132.448	-0.115795	143.2	0.165507	0.145724	0.185289
50.1948	0.0315305	102.415	0.28106	0.256603	0.305517		147.99	0.0473386	143.285	0.165486	0.145689	0.185283
57.7121	0.121823	102.748	0.281649	0.257067	0.306231		155.244	0.037182	143.754	0.165374	0.145496	0.185252
70.8925	-0.0325585	102.754	0.281659	0.257075	0.306243		151.683	-0.0444704	143.777	0.165368	0.145487	0.18525
64.2243	-0.0203618	102.761	0.281672	0.257085	0.306259		152.858	-0.0439893	143.855	0.16535	0.145455	0.185245
75.9881	-0.102797	102.771	0.281689	0.257098	0.306279		121.358	0.656896	143.892	0.165341	0.145439	0.185242
59.3076	0.0601535	102.782	0.281709	0.257114	0.306303		174.384	0.449194	143.935	0.165331	0.145422	0.18524
94.4235	0.619233	102.795	0.281732	0.257133	0.306331		158.357	0.326379	144.358	0.165229	0.145246	0.185212
68.1345	-0.00759447	103.164	0.282385	0.257645	0.307125		167.829	0.0740571	144.461	0.165204	0.145203	0.185206
41.5536	0.0636237	103.187	0.282425	0.257677	0.307173		165.298	0.0019991	144.956	0.165086	0.144996	0.185176
119.977	0.776567	103.209	0.282465	0.257708	0.307222		183.821	-0.0513729	144.976	0.165081	0.144988	0.185175
69.2465	0.59777	103.277	0.282586	0.257802	0.307369		175.148	0.0335569	145.034	0.165067	0.144963	0.185171
78.3093	0.136037	103.587	0.283133	0.25823	0.308036		132.28	-0.0490138	145.034	0.165067	0.144963	0.185171
51.2881	0.645367	103.596	0.28315	0.258243	0.308056		139.232	-0.0638126	145.528	0.164949	0.144755	0.185143
55.1037	0.142808	104.03	0.283918	0.258841	0.308995		63.9637	-0.057202	145.58	0.164936	0.144733	0.18514
49.4337	-0.0141197	104.053	0.283958	0.258873	0.309044		116.677	0.0691161	145.609	0.164929	0.144721	0.185138
122.628	0.766815	104.441	0.284644	0.259404	0.309884		72.9353	0.00222171	145.609	0.164929	0.144721	0.185138
114.366	-0.0170158	104.458	0.284674	0.259427	0.309921		160.177	-0.0809011	146.117	0.164808	0.144505	0.18511
59.2483	0.609867	104.483	0.284718	0.259461	0.309976		171.861	-0.0703585	146.14	0.164802	0.144495	0.185109
60.7892	0.0149112	104.483	0.284718	0.259461	0.309976		16.2867	0.442512	146.14	0.164802	0.144495	0.185109
114.81	-0.014552	105.277	0.286124	0.260543	0.311705		12.1266	0.0710011	146.186	0.164791	0.144475	0.185107
128.551	0.0766537	105.281	0.286131	0.260549	0.311714		15.9082	-0.031366	146.256	0.164774	0.144446	0.185103
87.0838	0.803464	105.287	0.286141	0.260556	0.311726		14.017	-0.0124111	146.744	0.164657	0.144237	0.185078
117.781	0.778076	105.316	0.286193	0.260596	0.31179		131.329	-0.0551357	146.767	0.164652	0.144227	0.185077
98.2313	0.0567291	105.362	0.286275	0.260659	0.311891		146.186	-0.0145453	146.831	0.164636	0.144199	0.185074
103.187	0.262735	105.403	0.286346	0.260713	0.311979		143.777	-0.118754	146.872	0.164627	0.144182	0.185072
107.826	0.296545	105.699	0.286871	0.261114	0.312627		121.921	0.138044	147.351	0.164512	0.143975	0.185049
55.5101	-0.130599	105.747	0.286955	0.261178	0.312731		109.489	0.0330517	147.409	0.164498	0.14395	0.185046
76.7495	0.0127405	105.761	0.28698	0.261198	0.312763		88.0983	0.541749	147.447	0.164489	0.143933	0.185045
80.2733	-0.0410168	105.816	0.287078	0.261272	0.312884		158.942	-0.00969551	147.907	0.164379	0.143733	0.185024
83.0516	0.558191	106.178	0.287718	0.26176	0.313677		146.831	-0.117409	147.919	0.164376	0.143728	0.185023
84.2722	-0.0215987	106.231	0.287811	0.26183	0.313792		99.0238	0.000175795	147.99	0.164359	0.143697	0.18502
61.1467	0.189049	106.549	0.288375	0.262258	0.314492		152.822	0.0656109	148.066	0.164341	0.143664	0.185017
61.5301	0.626126	106.646	0.288546	0.262387	0.314705		169.761	0.0180198	148.511	0.164234	0.143469	0.184999
64.2287	0.110504	107.015	0.289199	0.26288	0.315518		174.384	0.0703626	148.526	0.16423	0.143463	0.184998
105.747	0.309892	107.044	0.289251	0.262919	0.315583		164.051	0.0708664	148.605	0.164211	0.143428	0.184995
94.4545	0.382715	107.399	0.289879	0.263392	0.316367		187.368	0.00866492	148.688	0.164192	0.143391	0.184992
104.03	-0.0389737	107.435	0.289942	0.263439	0.316445		159.642	0.0073459	149.136	0.164084	0.143194	0.184974
65.3877	-0.0235251	107.519	0.29009	0.26355	0.31663		155.826	-0.068535	149.159	0.164078	0.143183	0.184974
134.518	-0.0905204	107.826	0.290634	0.263957	0.317311		134.661	-0.0784354	149.189	0.164071	0.14317	0.184972
110.046	-0.0362536	107.828	0.290637	0.26396	0.317315		27.74	0.00576823	149.701	0.163949	0.142943	0.184954
96.9339	0.46204	108.261	0.291404	0.264532	0.318277		14.0182	-0.0120852	149.808	0.163923	0.142896	0.184951
94.0922	0.172371	108.268	0.291417	0.264542	0.318292		121.346	0.00138374	149.846	0.163914	0.142878	0.184949
70.4172	0.374204	108.301	0.291475	0.264585	0.318365		103.475	-0.0320582	150.323	0.1638	0.142665	0.184934
72.3653	0.283321	108.68	0.292145	0.265083	0.319207		89.9974	-0.04756	150.34	0.163795	0.142657	0.184933
101.941	0.127064	108.71	0.292198	0.265123	0.319274		88.1928	-0.0665854	150.429	0.163774	0.142618	0.184931
99.882	0.0555581	109.108	0.292902	0.265644	0.32016		99.4607	0.117473	150.471	0.163764	0.142599	0.184929
113.906	-0.144777	109.124	0.29293	0.265665	0.320195		54.4764	-0.034441	150.935	0.163653	0.14239	0.184916
96.5889	0.0578247	109.157	0.292989	0.265708	0.320269		69.4546	-0.0601862	151.055	0.163624	0.142336	0.184912
101.92	0.451352	109.538	0.293664	0.266206	0.321121		181.821	0.342634	151.521	0.163512	0.142125	0.1849
31.1824	0.118157	109.578	0.293735	0.266258	0.321211		69.0603	-0.149291	151.575	0.163499	0.1421	0.184899
29.7071	0.0815692	109.592	0.29376	0.266277	0.321242		87.2681	0.0906257	151.605	0.163492	0.142087	0.184898
27.8672	0.622799	109.99	0.294463	0.266794	0.322132		122.407	0.197805	151.683	0.163474	0.142052	0.184896
111.735	0.144027	110.029	0.294533	0.266845	0.32222		162.689	0.0488069	152.125	0.163368	0.14185	0.184885
114.298	0.0238015	110.046	0.294563	0.266867	0.322259		169.761	0.577256	152.125	0.163368	0.14185	0.184885
110.874	-0.112411	110.4	0.295189	0.267326	0.323052		188.733	0.0269265	152.134	0.163366	0.141846	0.184885
113.86	-0.0803395	110.425	0.295232	0.267357	0.323107		167.907	-0.0671946	152.75	0.163218	0.141564	0.184872
63.1416	-0.102834	110.467	0.295308	0.267413	0.323203		186.691	0.0736683	152.768	0.163214	0.141556	0.184872
60.8057	-0.132217	110.828	0.295946	0.267878	0.324013		47.125	0.0324538	152.822	0.163201	0.141531	0.184871
53.2144	0.0874776	110.833	0.295955	0.267885	0.324024		85.3767	0.197309	152.858	0.163192	0.141514	0.18487
53.5977	0.0237789	110.874	0.296027	0.267937	0.324116		106.366	-0.0956422	153.353	0.163073	0.141286	0.184861
126.662	0.758851	110.906	0.296084	0.267979	0.324189		131.867	-0.00102297	153.45	0.16305	0.141241	0.184859
119.993	0.0869772	111.261	0.296711	0.268435	0.324987		135.247	-0.0665279	153.489	0.163041	0.141223	0.184859
101.185	-0.035158	111.275	0.296736	0.268454	0.325019		130.751	0.122886	153.96	0.162928	0.141004	0.184851
99.402	0.0365696	111.711	0.297508	0.269013	0.326002		140.837	0.818091	153.972	0.162925	0.140999	0.184851
89.1662	0.0648947	111.735	0.297551	0.269044	0.326058		145.609	-0.100713	153.99	0.162921	0.14099	0.184851
94.4235	0.690043	112.174	0.298328	0.269606	0.32705		148.066	-0.0955019	154.015	0.162915	0.140979	0.184851
105.699	0.282853	112.209	0.29839	0.26965	0.32713		141.514	-0.0268477	154.567	0.162782	0.140721	0.184843
110.425	0.0496089	112.585	0.299055	0.27013	0.327981		141.514	0.160571	154.57	0.162782	0.14072	0.184843
75.1489	-0.0431582	112.993	0.299777	0.270648	0.328907		104.466	-0.0436288	154.579	0.162779	0.140716	0.184843
65.3877	-0.0351064	113.86	0.30131	0.271743	0.330877		178.376	0.0575319	154.615	0.162771	0.140699	0.184843
122.212	0.523737	113.906	0.301392	0.271801	0.330982		102.433	0.0734196	154.676	0.162756	0.14067	0.184842
122.194	0.415967	114.282	0.302057	0.272275	0.33184		107.343	0.728176	154.761	0.162736	0.14063	0.184841
70.8925	0.0472153	114.285	0.302063	0.272279	0.331847		14.7757	0.728354	155.183	0.162635	0.140433	0.184837
85.0642	0.844647	114.298	0.302085	0.272295	0.331876		106.015	-0.0192233	155.189	0.162633	0.14043	0.184837
80.2618	0.116552	114.366	0.302206	0.27238	0.332031		155.875	-0.0119876	155.201	0.16263	0.140424	0.184837
74.0116	-0.0798623	114.386	0.302241	0.272405	0.332077		144.976	0.0762768	155.244	0.16262	0.140404	0.184836
79.862	0.0143737	114.728	0.302847	0.272835	0.332859		154.567	0.151778	155.311	0.162604	0.140372	0.184836
77.874	0.828956	114.81	0.302992	0.272938	0.333047		147.99	-0.00943894	155.798	0.162487	0.140142	0.184832
116.461	0.638436	115.167	0.303624	0.273384	0.333863		40.068	0.233243	155.826	0.162481	0.140129	0.184832
110.467	0.0181687	115.236	0.303745	0.27347	0.334021		104.861	0.0981807	155.875	0.162469	0.140106	0.184832
91.1428	-0.026219	115.599	0.304387	0.273923	0.334852		184.596	0.0180741	155.948	0.162451	0.140071	0.184831
53.9219	0.885773	115.682	0.304534	0.274026	0.335042		50.0137	0.0847852	156.423	0.162337	0.139846	0.184829
120.934	-0.0878219	116.031	0.305153	0.274461	0.335845		167.214	-0.018681	156.436	0.162335	0.13984	0.184829
32.2869	0.808683	116.074	0.305228	0.274514	0.335943		84.8894	-0.0100963	156.479	0.162324	0.13982	0.184829
122.691	0.0173329	116.461	0.305913	0.274994	0.336832		75.5877	-0.0717813	157.039	0.16219	0.139553	0.184827
49.4196	0.0826429	116.48	0.305947	0.275018	0.336876		59.0057	0.0751733	157.113	0.162172	0.139517	0.184827
82.6764	0.0998787	116.519	0.306015	0.275065	0.336965		177.716	0.0758078	157.664	0.16204	0.139253	0.184827
92.8102	0.0505232	117.394	0.307564	0.276146	0.338981		178.383	0.0351187	157.751	0.162019	0.139212	0.184827
103.164	0.738011	117.431	0.307629	0.276192	0.339066		155.311	0.0401519	157.788	0.16201	0.139194	0.184827
108.71	0.167246	117.781	0.308249	0.276623	0.339875		158.329	0.0442426	158.292	0.16189	0.138951	0.184828
41.5505	0.755469	117.841	0.308354	0.276696	0.340013		175.148	0.020915	158.329	0.161881	0.138933	0.184828
36.0155	-0.046063	117.841	0.308354	0.276696	0.340013		147.99	0.0909735	158.357	0.161874	0.138919	0.184828
87.1074	0.352455	118.243	0.309066	0.27719	0.340943		152.134	0.132013	158.391	0.161866	0.138903	0.184829
112.993	0.0739679	118.271	0.309116	0.277224	0.341008		123.574	-0.00467672	158.432	0.161856	0.138884	0.184829
70.8925	0.410831	118.654	0.309793	0.277693	0.341893		146.14	0.418838	158.905	0.161743	0.138654	0.184831
73.9744	0.473565	118.659	0.309803	0.277699	0.341906		140.43	0.0490171	158.942	0.161734	0.138636	0.184831
72.7696	0.205616	118.689	0.309855	0.277735	0.341974		74.618	0.224077	158.967	0.161728	0.138624	0.184831
75.548	0.107446	118.703	0.30988	0.277753	0.342007		148.605	0.0397301	159.035	0.161711	0.138591	0.184832
88.7672	-0.0332001	118.719	0.309909	0.277773	0.342045		73.7289	-0.0111495	159.533	0.161592	0.138349	0.184835
32.6668	-0.0624585	119.977	0.312135	0.279306	0.344965		67.683	0.478402	159.58	0.161581	0.138326	0.184836
30.0839	0.102488	119.993	0.312163	0.279324	0.345001		77.2998	0.0905287	159.608	0.161574	0.138313	0.184836
61.9129	0.0637003	120.017	0.312205	0.279354	0.345057		134.077	-0.0872753	159.608	0.161574	0.138313	0.184836
83.1039	0.243799	120.412	0.312904	0.279832	0.345976		158.432	0.0838228	159.642	0.161566	0.138296	0.184836
85.8822	0.0250957	120.416	0.312912	0.279838	0.345986		136.869	0.0706778	159.683	0.161556	0.138276	0.184836
61.1758	0.145287	120.44	0.312953	0.279866	0.34604		143.754	0.259742	159.683	0.161556	0.138276	0.184836
67.3062	0.148001	120.502	0.313063	0.279941	0.346185		163.974	0.23528	160.158	0.161442	0.138044	0.184841
71.6238	-0.179054	120.857	0.313691	0.28037	0.347011		53.6415	0.115298	160.164	0.161441	0.138041	0.184841
67.3308	0.0920316	120.868	0.31371	0.280384	0.347037		147.351	-0.0975095	160.164	0.161441	0.138041	0.184841
99.402	0.127539	120.888	0.313746	0.280408	0.347084		149.808	-0.0714372	160.177	0.161438	0.138035	0.184841
120.44	0.167356	120.934	0.313828	0.280464	0.347192		134.528	0.168375	160.177	0.161438	0.138035	0.184841
114.285	0.860341	121.315	0.314501	0.280923	0.348079		117.294	0.0717981	160.221	0.161427	0.138013	0.184842
79.0717	0.330286	121.387	0.314629	0.28101	0.348248		74.318	0.094947	160.836	0.16128	0.137711	0.184849
73.149	0.0414412	121.747	0.315266	0.281444	0.349088		118.174	0.757673	160.94	0.161255	0.13766	0.18485
68.4983	0.00535823	121.863	0.315472	0.281584	0.34936		150.323	0.794664	161.424	0.161139	0.137421	0.184857
88.7046	0.725006	122.184	0.316039	0.281968	0.350109		163.346	0.0594658	161.436	0.161136	0.137415	0.184857
118.271	0.180441	122.188	0.316047	0.281974	0.350119		154.579	-0.0334622	161.455	0.161131	0.137406	0.184857
109.538	0.0328559	122.194	0.316057	0.281981	0.350132		171.821	0.195685	161.594	0.161098	0.137337	0.184859
80.7331	0.139983	122.212	0.316088	0.282002	0.350175		25.8129	0.0605565	162.052	0.160988	0.13711	0.184867
70.0294	0.611603	122.628	0.316825	0.282502	0.351149		15.5301	0.861372	162.077	0.160982	0.137098	0.184867
94.0374	0.206678	122.691	0.316937	0.282577	0.351297		133.424	0.363504	162.077	0.160982	0.137098	0.184867
118.703	0.142544	123.074	0.317614	0.283035	0.352193		101.93	0.0320147	162.689	0.160836	0.136793	0.184878
96.5141	0.450981	123.532	0.318425	0.283582	0.353267		142.625	0.557144	162.721	0.160828	0.136777	0.184879
64.6115	0.863549	123.982	0.319221	0.284119	0.354324		164.673	-0.0184664	162.816	0.160805	0.13673	0.184881
68.4983	0.196889	124.037	0.319318	0.284184	0.354452		102.938	0.130753	163.321	0.160684	0.136478	0.184891
98.9966	0.340692	124.418	0.319992	0.284637	0.355347		76.0137	-0.110374	163.33	0.160682	0.136473	0.184891
91.1428	0.432126	124.493	0.320125	0.284726	0.355525		82.1301	0.498869	163.346	0.160678	0.136465	0.184891
96.9145	0.806126	124.859	0.320772	0.28516	0.356384		79.4723	-0.0823633	163.432	0.160658	0.136422	0.184893
98.1641	0.744241	124.868	0.320789	0.285171	0.356406		93.8921	-0.112238	163.473	0.160648	0.136402	0.184894
130.73	0.604164	126.662	0.323963	0.287291	0.360636		126.197	0.0638276	163.974	0.160528	0.13615	0.184905
141.353	0.369297	126.709	0.324046	0.287346	0.360746		159.608	-0.0394152	163.993	0.160523	0.136141	0.184906
131.743	0.219846	127.102	0.324742	0.287808	0.361675		83.0701	-0.092499	164.051	0.160509	0.136112	0.184907
100.652	0.788799	127.104	0.324746	0.287811	0.361681		60.1059	0.181799	164.051	0.160509	0.136112	0.184907
107.519	0.237961	127.595	0.325613	0.288386	0.36284		60.5216	0.784784	164.089	0.1605	0.136093	0.184908
144.653	0.189137	128.011	0.32635	0.288874	0.363825		63.0415	0.173662	164.596	0.160379	0.135837	0.18492
111.275	0.677617	128.053	0.326425	0.288924	0.363925		95.6929	-0.0978089	164.673	0.16036	0.135798	0.184922
120.868	0.299838	128.46	0.327144	0.2894	0.364889		135.1	0.129904	164.749	0.160342	0.13576	0.184924
98.9749	0.629629	128.498	0.327211	0.289444	0.364979		111.405	0.744119	165.298	0.160211	0.135482	0.184939
57.7237	0.818697	128.551	0.327305	0.289506	0.365104		106.366	-0.0390352	165.368	0.160194	0.135447	0.184941
87.9554	0.330349	129.014	0.328126	0.290047	0.366204		131.718	0.124261	166.032	0.160035	0.13511	0.18496
91.9555	0.841417	129.38	0.328772	0.290473	0.36707		135.664	-0.0841155	166.525	0.159916	0.134858	0.184974
131.208	0.608669	129.419	0.328841	0.290519	0.367163		171.148	-0.0407186	166.525	0.159916	0.134858	0.184974
131.179	0.602134	129.814	0.329541	0.290979	0.368102		171.907	-0.0287135	166.583	0.159902	0.134829	0.184976
121.863	0.189057	129.822	0.329554	0.290988	0.368119		173.179	-0.0338522	166.654	0.159886	0.134793	0.184978
118.243	0.236624	129.9	0.329693	0.291079	0.368306		96.2584	-0.0414884	167.162	0.159764	0.134532	0.184995
110.828	0.791214	130.269	0.330346	0.291508	0.369184		114.661	-0.0422768	167.166	0.159763	0.134531	0.184995
143.255	0.494818	130.279	0.330363	0.29152	0.369206		179.104	-0.0346581	167.214	0.159751	0.134506	0.184996
142.324	0.473525	130.726	0.331153	0.292038	0.370269		120.39	-0.150688	167.279	0.159736	0.134473	0.184999
133.516	0.461594	130.73	0.331162	0.292044	0.37028		107.901	-0.0709902	167.829	0.159604	0.13419	0.185017
132.585	0.517282	130.759	0.331213	0.292077	0.370348		30.7442	0.086478	167.829	0.159604	0.13419	0.185017
110.833	0.870693	130.79	0.331268	0.292113	0.370423		38.5721	-0.133009	167.907	0.159585	0.13415	0.18502
116.48	0.0900757	131.178	0.331954	0.292563	0.371346		29.2085	0.0646136	168.47	0.15945	0.13386	0.18504
94.0374	0.800704	131.179	0.331956	0.292564	0.371349		27.6798	0.67209	168.509	0.159441	0.13384	0.185042
81.8508	0.520803	131.189	0.331973	0.292575	0.371371		120.427	-0.0308169	168.538	0.159434	0.133825	0.185043
130.79	0.228169	131.198	0.331988	0.292585	0.371392		111.001	-0.0307151	168.574	0.159425	0.133807	0.185044
122.188	0.820627	131.208	0.332007	0.292598	0.371417		115.032	0.0103041	169.205	0.159274	0.13348	0.185068
110.029	0.403981	131.255	0.332091	0.292652	0.371529		186.585	-0.0797798	169.761	0.159141	0.133192	0.185089
137.617	0.305068	131.634	0.332761	0.293091	0.372432		126.304	-0.0182141	169.787	0.159134	0.133178	0.185091
138.548	0.810184	131.637	0.332766	0.293094	0.372438		111.529	-0.0760118	169.918	0.159103	0.13311	0.185096
120.502	0.259604	131.649	0.332787	0.293108	0.372467		153.353	0.0884194	170.431	0.15898	0.132843	0.185117
114.728	0.805082	131.743	0.332954	0.293217	0.372691		171.069	0.130422	170.451	0.158975	0.132833	0.185118
154.767	0.119896	132.134	0.333646	0.293668	0.373623		161.594	-0.0176117	170.51	0.158961	0.132802	0.18512
51.6791	0.329917	132.15	0.333674	0.293687	0.373661		62.3354	-0.0828407	171.069	0.158827	0.132511	0.185144
129.014	0.0274375	132.585	0.334443	0.294188	0.374697		59.7672	-0.0603568	171.078	0.158825	0.132506	0.185144
15.032	0.205592	133.516	0.33609	0.29526	0.37692		134.661	-0.05423	171.118	0.158816	0.132485	0.185146
107.828	0.287172	134.518	0.337864	0.296412	0.379317		168.47	0.806353	171.148	0.158808	0.132469	0.185147
101.483	0.481598	134.844	0.33844	0.296785	0.380096		138.537	0.807877	171.148	0.158808	0.132469	0.185147
96.4824	0.216995	134.874	0.338493	0.296819	0.380167		187.999	0.0065216	171.184	0.1588	0.132451	0.185149
94.8517	-0.00157791	135.306	0.339258	0.297314	0.381203		98.4788	0.0440797	171.742	0.158666	0.132158	0.185174
84.3018	-0.088457	136.69	0.341706	0.298894	0.384519		88.6414	0.0177374	171.821	0.158647	0.132117	0.185177
84.6979	0.182739	136.71	0.341742	0.298917	0.384567		105.345	0.258896	171.861	0.158637	0.132096	0.185179
43.4118	0.338488	137.168	0.342553	0.299439	0.385667		157.788	0.0430114	171.907	0.158626	0.132071	0.185181
43.0403	0.145086	137.191	0.342593	0.299465	0.385722		173.82	-0.00426898	172.409	0.158506	0.131808	0.185204
39.3404	-0.103348	137.617	0.343347	0.29995	0.386744		167.166	0.0817835	172.462	0.158493	0.13178	0.185207
76.7264	0.113477	138.548	0.344994	0.301007	0.388981		180.49	0.217484	172.499	0.158485	0.131761	0.185209
67.3179	0.462664	139.02	0.34583	0.301543	0.390118		189.484	-0.00348852	173.08	0.158345	0.131455	0.185236
64.2574	0.0315021	141.353	0.349957	0.30418	0.395734		89.1909	-0.143034	173.106	0.158339	0.131441	0.185237
109.157	0.165898	142.324	0.351676	0.305274	0.398077		83.9504	0.819145	173.139	0.158331	0.131423	0.185239
96.5387	-0.0170551	143.255	0.353323	0.30632	0.400325		79.438	0.181544	173.179	0.158322	0.131402	0.185241
96.9463	0.103984	144.653	0.355797	0.307889	0.403705		78.9959	0.0380337	173.226	0.15831	0.131377	0.185243
96.9463	0.177753	154.767	0.373693	0.319125	0.428261		77.2112	0.861339	173.713	0.158193	0.13112	0.185267
69.319	0.0574511	165.167	0.392094	0.330526	0.453663		75.4488	0.593257	173.753	0.158184	0.131098	0.185269
63.4548	0.588299	177.993	0.41479	0.344443	0.485138		71.1397	0.0623553	173.82	0.158168	0.131063	0.185273
56.5853	0.0994941						52.7445	0.887413	173.863	0.158158	0.13104	0.185275
67.3483	0.0689783						31.127	0.795889	174.364	0.158038	0.130775	0.1853
117.781	0.00125901						165.298	0.109498	174.384	0.158033	0.130764	0.185301
62.7282	-0.0728779						163.993	0.0607482	175.081	0.157866	0.130394	0.185338
62.7282	0.0901848						163.432	0.0721953	175.111	0.157858	0.130378	0.185339
74.7982	0.0368198						125.743	0.00976182	175.148	0.15785	0.130358	0.185341
24.5629	0.515606						141.593	-0.0595696	175.192	0.157839	0.130335	0.185343
105.281	0.813888						175.795	0.165267	175.694	0.157719	0.130067	0.18537
96.0742	0.725616						173.863	0.191907	175.715	0.157714	0.130056	0.185371
99.4292	0.0157662						168.574	0.0672074	175.735	0.157709	0.130045	0.185373
102.415	0.012444						159.533	0.00593617	175.795	0.157694	0.130013	0.185376
31.1801	0.115023						191.619	0.0239967	175.836	0.157685	0.129992	0.185378
38.2239	0.163299						82.1656	0.158305	176.362	0.157559	0.12971	0.185407
31.5486	0.0428544						180.572	0.0930887	176.365	0.157558	0.129709	0.185407
87.4858	-0.001982						185.242	0.197083	176.375	0.157556	0.129703	0.185408
90.3219	-0.0614544						188.68	0.192343	176.446	0.157539	0.129665	0.185412
90.3219	-0.0219264						104.844	0.00492908	176.483	0.15753	0.129646	0.185414
80.749	-0.0748168						133.411	0.0628353	176.527	0.157519	0.129622	0.185416
96.0952	0.276845						40.4307	0.591493	177.039	0.157396	0.129348	0.185445
102.748	-0.0806141						35.0468	-0.0844234	177.702	0.157237	0.128991	0.185484
101.497	0.134235						166.525	0.167499	177.706	0.157237	0.128989	0.185484
104.483	0.0258398						140.888	-0.0207648	177.716	0.157234	0.128984	0.185484
70.0239	0.700945						159.035	0.156778	177.733	0.15723	0.128975	0.185485
66.16	0.0662395						152.125	-0.0977139	177.787	0.157217	0.128946	0.185489
35.2555	0.102606						110.38	-0.0310924	178.376	0.157076	0.128628	0.185523
25.6654	0.388104						115.049	0.0609207	178.383	0.157074	0.128625	0.185524
62.3727	-0.0539908						69.5306	0.333008	178.383	0.157074	0.128625	0.185524
36.3831	0.124458						72.4662	0.423639	178.397	0.157071	0.128617	0.185525
30.0766	-0.0358989						74.209	0.0546713	179.081	0.156907	0.128248	0.185566
72.4169	-0.0324432						71.5512	0.13533	179.104	0.156901	0.128235	0.185568
78.2702	-0.0157609						141.996	0.109294	179.795	0.156736	0.127861	0.18561
75.9033	0.723123						148.605	0.107688	180.408	0.156589	0.127529	0.185649
117.394	0.184415						150.471	-0.00190434	180.49	0.156569	0.127484	0.185654
37.8554	0.0988742						131.867	-0.0464377	180.572	0.15655	0.127439	0.18566
129.822	0.261933						177.787	0.300142	181.085	0.156427	0.127161	0.185693
121.747	0.774523						181.085	0.15824	181.092	0.156425	0.127157	0.185693
72.4061	0.284268						105.946	0.0814281	181.106	0.156422	0.127149	0.185694
131.634	0.788635						188.68	0.855004	181.126	0.156417	0.127138	0.185695
104.053	0.0382749						31.9178	-0.0731359	181.126	0.156417	0.127138	0.185695
96.0742	0.732702						133.467	0.54329	181.188	0.156402	0.127104	0.185699
43.4078	0.137767						151.055	0.0520929	181.188	0.156402	0.127104	0.185699
78.3204	-0.106483						150.429	0.0719795	181.229	0.156392	0.127082	0.185702
85.9566	0.0915881						164.089	0.00465078	181.821	0.15625	0.12676	0.185741
85.9566	0.0224158						125.814	0.0650651	181.852	0.156243	0.126743	0.185743
75.1157	0.211976						66.3915	0.136289	181.852	0.156243	0.126743	0.185743
60.7722	0.0483612						143.935	0.0536989	182.519	0.156083	0.126378	0.185788
64.6032	-0.0251875						183.863	0.0867727	182.553	0.156075	0.126359	0.18579
102.795	0.0226495						77.6676	0.570158	182.595	0.156065	0.126337	0.185793
95.6563	0.694824						72.3954	0.0080592	183.148	0.155932	0.126034	0.185831
40.43	0.569591						67.724	0.0348821	183.148	0.155932	0.126034	0.185831
43.0345	0.112863						175.111	0.0629777	183.22	0.155915	0.125994	0.185836
98.9966	0.0824613						87.1423	0.848232	183.304	0.155895	0.125948	0.185842
31.5822	-0.057381						116.624	0.10626	183.821	0.155771	0.125664	0.185877
56.2585	-0.0266191						156.479	0.126528	183.842	0.155766	0.125653	0.185879
66.9399	0.425144						163.321	0.804522	183.863	0.155761	0.125641	0.18588
78.7232	0.0971452						175.735	0.140328	183.891	0.155754	0.125626	0.185882
77.5171	0.135959						167.829	0.119333	184.596	0.155585	0.125238	0.185932
101.986	-0.0181365						132.855	0.221954	184.68	0.155565	0.125192	0.185938
98.199	0.00188949						80.0262	0.20175	185.2	0.15544	0.124905	0.185975
90.7295	0.869724						68.9597	0.747888	185.221	0.155435	0.124894	0.185977
95.2688	0.0950912						92.772	0.312423	185.242	0.15543	0.124882	0.185978
39.7148	0.115919						120.39	0.0582707	185.905	0.155271	0.124516	0.186027
32.2861	-0.0185769						170.431	0.27299	185.905	0.155271	0.124516	0.186027
35.2461	0.105146						157.664	0.123962	185.923	0.155267	0.124507	0.186028
37.8506	0.0842571						63.4559	0.860585	186.017	0.155245	0.124454	0.186035
53.5408	0.162843						144.461	0.0797388	186.585	0.155108	0.12414	0.186077
56.1932	0.0290351						67.724	0.217989	186.691	0.155083	0.124081	0.186085
101.969	0.0573035						159.683	0.0226822	187.336	0.154928	0.123723	0.186133
46.0463	-0.0416585						183.842	0.826865	187.368	0.154921	0.123706	0.186136
53.2244	-0.0249799						158.905	0.79353	187.999	0.154769	0.123355	0.186184
41.5481	0.618402						157.751	0.176413	188.021	0.154764	0.123344	0.186185
84.6568	0.828817						167.279	0.0918393	188.049	0.154758	0.123328	0.186187
99.8227	-0.0348252						129.107	0.170793	188.68	0.154606	0.122977	0.186236
89.9665	0.0381588						56.0127	0.675408	188.733	0.154594	0.122947	0.18624
40.0574	0.802369						163.33	0.740668	189.484	0.154414	0.122528	0.186299
							155.183	0.781266	190.083	0.15427	0.122194	0.186346
							146.256	0.216332	190.169	0.15425	0.122146	0.186353
							131.17	0.888359	190.254	0.154229	0.122098	0.18636
							199.384	0.576362	190.856	0.154085	0.121761	0.186408
							92.772	0.853115	190.892	0.154076	0.121741	0.186411
							139.673	0.732307	191.579	0.153911	0.121356	0.186467
							108.936	0.521019	191.619	0.153902	0.121334	0.18647
							198.782	0.26033	191.619	0.153902	0.121334	0.18647
							184.68	0.248788	192.94	0.153585	0.120592	0.186579
							183.148	0.877766	195.07	0.153075	0.11939	0.186759
							50.7839	0.317994	195.768	0.152908	0.118996	0.18682
							146.872	0.150853	198.782	0.152185	0.117283	0.187087
							131.867	0.18578	199.384	0.152041	0.11694	0.187141
							113.089	0.0872528	200.909	0.151675	0.11607	0.187281
							118.729	-0.054009	201.569	0.151517	0.115692	0.187342
							117.186	0.0661166	202.456	0.151304	0.115184	0.187425
							130.142	-0.0362481
							181.852	0.172782
							140.43	-0.0222985
							145.528	0.162061
							96.0601	0.18657
							94.6524	-0.0352668
							83.6049	-0.0647675
							94.1707	0.253012
							70.7567	0.0528798
							67.694	0.0293138
							126.783	-0.0839703
							97.5012	0.746695
							112.431	-0.0674605
							162.077	0.142589
							96.6514	-0.0582555
							97.1176	0.0781942
							175.836	-0.00534653
							161.455	0.176027
							160.836	0.0394654
							62.2646	-0.0376786
							147.919	0.105684
							152.125	0.0764276
							143.855	-0.0106487
							138.537	-0.085724
							132.988	0.0024542
							144.358	0.607242
							24.2562	0.68271
							29.2653	-0.0348349
							154.615	0.107483
							115.631	0.0339138
							109.489	-0.0256072
							92.4523	-0.0907668
							191.579	0.0207615
							142.115	-0.0374371
							138.554	0.0598018
							99.4976	0.0761414
							102.521	0.0452538
							153.972	0.787176
							172.499	0.042613
							30.7414	0.178843
							37.7369	0.0997447
							30.7414	0.100256
							86.694	0.00656813
							89.9195	-0.0580363
							132.32	-0.0763974
							153.96	-0.0318563
							96.1097	0.236504
							102.87	-0.0440366
							65.1494	0.0756662
							188.049	0.0434916
							140.865	0.510464
							173.713	0.779523
							177.039	0.0370874
							169.918	0.0715523
							139.12	-0.0429133
							34.6225	0.108749
							29.9772	-0.141938
							149.136	0.245811
							137.489	0.11038
							139.165	0.238028
							181.188	0.163354
							162.077	0.514178
							130.071	0.0852386
							77.2776	-0.0350621
							100.472	0.0120544
							37.3532	0.110633
							113.625	-0.156573
							67.683	0.555429
							168.538	0.0436289
							164.051	0.0243276
							143.892	-0.123127
							143.285	0.0202642
							141.483	-0.00427083
							153.99	0.221913
							146.14	0.210608
							72.0048	0.00508531
							128.468	-0.0575395
							60.1202	0.0276844
							63.8613	-0.03162
							95.1066	0.758237
							140.276	0.216269
							160.164	0.14431
							157.039	0.0416373
							120.941	-0.0536963
							126.753	-0.043796
							139.14	0.110542
							170.51	0.0864819
							55.7133	0.00331471
							65.971	0.191866
							66.0082	0.432557
							77.2998	0.0186923
							118.685	-0.0171277
							102.521	0.0856161
							98.0819	0.033515
							94.1843	0.0925172
							190.254	0.0914433
							201.569	-0.00391509
							111.915	0.80179
							39.3094	0.118733
							31.8934	0.0100567
							34.2184	0.061315
							36.9587	0.102916
							55.5865	0.0269027
							102.012	0.0815433
							167.907	-0.0288925
							150.429	0.195817
							140.837	0.566866
							52.4556	0.021257
							40.8194	0.30395
							131.724	0.676881
							181.092	0.0905902
							178.383	0.150047
							200.909	0.106673
							160.94	0.010984
							128.535	0.0945564

## Sheet: panel h
	1st correlation				2nd correlation
	Normalized # of ROIs				Normalized # of ROIs
Bin (x)	Uncorrected	Corrected		Bin (x)	Uncorrected	Corrected
-0.975	0	0		-0.975	0	0
-0.925	0	0		-0.925	0	0
-0.875	0	0		-0.875	0	0
-0.825	0	0		-0.825	0	0
-0.775	0	0		-0.775	0	0
-0.725	0	0		-0.725	0	0
-0.675	0	0		-0.675	0	0
-0.625	0	0		-0.625	0	0
-0.575	0	0		-0.575	0	0
-0.525	0	0		-0.525	0	0
-0.475	0	0		-0.475	0	0
-0.425	0	0		-0.425	0	0
-0.375	0	0		-0.375	0	0
-0.325	0	0		-0.325	0	0
-0.275	0	0		-0.275	0	0
-0.225	0	0		-0.225	0	0
-0.175	0	0		-0.175	0	0
-0.125	0	0		-0.125	0	0.01176
-0.075	0.00101	0.00062383		-0.075	0	0.02353
-0.025	0.00101	0.00187		-0.025	0.04839	0.03529
0.025	0.00101	0.0437		0.025	0.14516	0.18824
0.075	0	0.00374		0.075	0.1129	0.24706
0.125	0.00405	0.00811		0.125	0.12903	0.18824
0.175	0.00405	0.00749		0.175	0.08065	0.11765
0.225	0.00405	0.00749		0.225	0.06452	0.05882
0.275	0.00608	0.00312		0.275	0.03226	0.05882
0.325	0.00304	0.00374		0.325	0.04839	0.01176
0.375	0.01216	0.00686		0.375	0.04839	0.01176
0.425	0.01925	0.00624		0.425	0.06452	0.03529
0.475	0.01114	0.0025		0.475	0.04839	0.01176
0.525	0.02432	0.00873		0.525	0.03226	0
0.575	0.0233	0.01061		0.575	0.09677	0
0.625	0.05775	0.01871		0.625	0	0
0.675	0.0618	0.03244		0.675	0.04839	0
0.725	0.08713	0.04554		0.725	0	0
0.775	0.1074	0.0655		0.775	0	0
0.825	0.13982	0.11229		0.825	0	0
0.875	0.15907	0.15409		0.875	0	0
0.925	0.14387	0.25265		0.925	0	0
0.975	0.12867	0.24329		0.975	0	0

## Sheet: panel k
# of ROIs/area for Uncorrected	# of ROIs/area for Corrected
0.607289	0.439113
1.54283	0.532054
0.40532	1.40813			MEAN	SEM
0.190505	0.788663		Uncorrected	0.798384	0.128499
0.969871	0.646854		Corrected	0.779253	0.141013
0.938429	0.860708
0.955161
0.775271
0.800781

## Sheet: panel l
SNR for Uncorrected	SNR for Corrected
2.18887	63.0589
2.34092	5.89244			MEAN	SEM
1.65617	12.3976		Uncorrected	1.4389	0.0436756
1.0293	3.87941		Corrected	1.78422	0.208969
4.4764	4.87411
6.65101	2.48843
1.68531	4.13719
3.10798	2.41458
1.73438	3.00064
1.84343	2.33054
1.60605	3.01499
3.97992	1.98358
3.00829	2.22838
1.64659	1.69991
1.69293	1.96862
1.92392	2.15649
1.34708	1.53956
1.65966	1.43604
1.54209	1.4679
1.61199	2.27068
1.51045	1.36009
1.91766	1.85453
1.00925	1.40702
1.39281	1.31744
1.61771	1.00368
1.33366	1.49988
1.72578	1.85102
2.35233	1.57676
1.49421	0.943977
1.68118	1.29878
1.8567	1.81314
1.2057	1.1439
1.32789	0.820951
1.33538	8.89248
1.662	2.53865
1.67166	3.20319
1.15222	3.59753
1.27834	3.01207
1.26924	2.04884
1.17876	2.83435
1.30283	2.15204
1.22419	1.14294
1.3676	2.61187
0.887061	2.36246
1.86219	2.07162
1.46276	2.36155
2.38272	2.09913
2.15222	1.74405
2.26343	4.02529
2.00617	1.80464
1.34461	2.7149
1.86076	1.2893
1.7364	1.55594
1.44463	1.42009
2.56921	1.58338
2.5491	1.92265
1.79398	2.18263
2.51429	1.45669
1.70882	1.35208
3.30663	1.59678
1.31423	0.991815
1.19196	1.60401
1.33043	1.42465
1.24528	1.60511
1.48871	1.53878
1.24786	1.12335
1.29603	0.885614
1.3256	0.961002
1.15882	0.766852
1.30246	2.25578
1.62333	2.11201
0.915893	2.30012
1.10056	2.32206
1.20622	1.24363
1.2979	1.04496
1.30379	1.39518
0.90788	1.4309
0.931356	1.1007
1.32432	1.13133
1.36205	1.16986
1.31211	0.910699
1.02086	0.841517
0.977703	1.22619
0.787528	1.18977
0.82947	1.41774
0.939594	1.27287
0.817896	1.4984
0.820998	1.7961
0.973267	0.98839
0.691593	0
0.823637	1.01811
0.772236	1.72537
0.954354	0.819601
0.509624	1.68375
0.522166	2.6842
0.608841	1.35501
1.18924	1.97198
2.88446	2.41409
1.99519	2.56144
1.23652	1.3391
1.05534	2.04308
1.28401	2.90008
1.10006	1.47745
2.50985	2.02849
1.30742	1.61319
2.29878	1.41574
1.84304	1.39452
1.17098	1.1413
3.08659	1.40612
1.35989	1.97875
1.66639	2.60748
1.10271	1.24832
1.35751	1.87299
1.2339	1.16652
0.931766	1.11543
1.50033	0.929199
1.19604	2.02925
0.96211	1.32342
1.33273	1.83402
1.17571	1.30503
0.94535	1.73777
1.1125	1.97048
1.01249	2.06482
0.980647	0.864867
0.826193	1.38252
1.01281	1.72589
0.878255	2.08321
1.03164	1.49654
0.921469	1.54272
0.380592	0.878772
0.415511	1.12479
4.20583	1.04189
1.51005	1.39029
1.55971	0.72067
1.46544	0.906322
1.36895	1.80694
1.07326	1.87106
1.44342	2.08655
0.831834	1.66279
1.09915	1.41344
1.58048	1.40284
0.723697	1.27246
0.297836	1.51979
0.385392	1.86005
0.879895	1.69812
0	1.91168
7.01368	0.960006
3.63737	0.984779
4.54849	1.71006
2.33786	1.63988
1.85098	2.71741
2.98714	0.746782
1.782	0.657112
1.26153	1.11267
2.41126	1.61391
2.37899	1.21573
1.42708	1.06591
1.37958	1.66764
1.37397	1.60156
1.67688	1.08138
2.12201	1.61683
2.33051	1.05345
1.16326	2.91543
1.97154	1.24666
1.71299	1.68973
1.53134	1.81075
2.3711	2.55708
1.43397	2.40043
1.22591	1.54941
2.24916	1.65533
1.4584	1.71124
2.65678	1.60746
1.26975	2.02383
1.44618	1.47037
1.29382	1.30933
1.28571	1.88452
0.835298	1.83875
0.995218	1.98204
1.43956	1.37532
1.43267	1.75313
1.11433	1.4156
1.24008	1.1077
1.60925	1.53569
1.15568	1.34092
0.736881	1.64705
1.24047	1.49297
0.887026	1.91505
1.08989	1.41718
1.13705	1.82631
1.08696	1.74196
0.874902	1.40155
1.11186	0.991132
1.14563	1.38074
0.892938	1.14937
1.18635	1.02145
1.28146	1.22727
0.925652	1.39753
0.761045	1.30081
1.16708	1.16481
1.36262	1.40904
1.14179	1.04672
0.748882	1.53807
0.984137	0.876371
0.895151	1.19227
1.10407	1.21305
0.718499	1.24821
0.732694	1.19595
0.771833	0.937562
1.01686	1.36883
0.738203	1.11732
0.787097	0.946547
0.778399	1.06118
0.914236	1.17132
0.300341	0.942979
2.41091	0.891154
0.31439	0.703428
0.5536	1.22406
0.271709	0.841828
0.276749	0.8628
0.331327	1.09358
0.679163	1.17632
1.23849	1.09678
0.831397	0.795382
0.400827	0.91728
0.303431	0.804434
0.332721	0.586787
0.729568	0.419111
0	1.23067
0	0.901784
0	1.4995
0	1.28458
0	1.38022
0	1.19622
16.3739	1.37912
1.46629	1.11983
6.85814	1.10131
0.834735	1.38763
1.54718	1.1116
1.72909	0.876292
1.49005	0.978761
2.29379	1.04565
1.63793	0.947971
0.367214	1.1152
1.84142	0.720537
0.928112	0.772834
1.44181	0.767676
1.24294	1.64845
1.84585	1.6917
1.25877	1.94247
1.25706	1.51742
0.931755	2.00763
1.02117	1.21679
0.934981	1.10523
1.55388	0.907507
0.924416	1.48135
0.952012	2.14826
0.864429	2.40692
2.25536	2.10094
1.07832	2.13949
1.4887	1.03808
0.826155	1.40359
1.84216	0.966655
1.31653	1.30916
0	0.785004
1.20803	0.931471
0.998497	0.823247
1.3857	0.917071
0	1.04256
1.43038	1.46895
0.853491	1.12084
0.804875	0.999885
1.23394	1.23668
0.664912	1.29197
1.49379	0.897461
1.94715	1.06957
0.890451	1.1823
1.14401	0.98013
1.55298	2.57757
0.931811	1.17488
1.17691	1.40162
1.03113	1.5908
1.34378	0.961649
0	1.01214
1.20874	1.14225
0.949671	1.71366
0.831311	1.05522
0.856912	1.56066
1.20106	0.872076
0.856901	1.33657
0.777069	1.10666
0.911646	1.04153
1.18413	1.25339
1.04334	1.32713
1.01983	1.2425
1.28175	0.78612
0	1.52682
0.89777	0.809895
0.431312	1.0611
0	1.00611
0.683858	0.791214
0.914346	2.21691
0.995456	1.45095
1.56972	1.01565
1.17162	1.169
0.840605	1.18012
1.58223	1.51414
1.20983
0
0.384753
1.168
1.3645
1.10381
0.33305
0.959226
1.36111
1.81556
1.50356
1.21495
1.64928
0.929994
2.55494
1.01252
1.2119
7.47155
1.76488
0.867221
1.07819
1.51473
0.814198
2.94018
1.16958
0.938313
1.49267
1.30017
1.11892
2.59537
2.30048
2.01888
2.56783
0.888116
0.928503
1.29027
1.03256
1.57209
1.18294
1.07013
1.75302
1.67874
1.43533
1.35634
1.45638
1.1199
0.935197
1.10041
1.66241
1.35848
0.899019
1.13205
1.07638
1.38919
1.52797
0.78342
1.61196
1.0013
1.12317
0.964859
0
1.22433
0.732105
1.00965
1.16492
0.664491
0.884302
0.844817
1.01481
0.982787
0.898095
0.876407
1.02029
2.11721
0.963996
1.14541
1.11522
1.75947
3.77731
1.57824
1.00852
1.18662
0.765967
1.1775
1.0002
1.03789
0.746073
1.20604
0.975846
1.14034
0.743792
1.12697
0.886372
0.900912
1.03823
0.96085
0.900533
0.676085
0.797808
0.936894
1.93162
2.47905
4.44936
2.44215
2.82655
1.95792
1.78331
2.83575
1.63518
3.06457
1.74495
1.75418
1.39301
2.86357
1.51152
2.26909
2.98935
2.21104
1.70969
1.99027
1.73329
1.40905
1.09994
1.14343
1.76981
1.05504
1.82038
1.4317
1.72552
2.16279
1.61504
1.52111
1.71515
1.36169
2.03535
1.40461
2.34497
0.820928
2.11674
1.62958
1.79447
3.2925
0.742198
1.24338
1.86173
2.32039
0.685695
2.13122
1.66019
1.25261
2.01487
1.34343
2.00843
1.86032
1.80691
1.63819
1.66824
1.71177
1.48579
1.78609
1.61365
2.53839
1.8505
1.84586
1.50443
1.30823
2.95847
1.31729
1.57521
1.19683
1.55808
2.72906
1.7778
1.69476
1.75025
1.83414
1.32376
2.03877
1.92786
1.43924
1.17509
1.74213
1.65016
1.32529
1.07479
1.2118
1.68235
1.42476
1.31037
2.076
3.05769
1.43586
1.31614
1.07431
0.797846
1.25693
1.23441
0.983422
0.877826
1.28275
1.55277
1.85533
1.41826
0.984225
0.628763
1.55057
1.23759
1.29131
1.38448
1.46581
2.96751
1.16272
1.18097
1.06291
1.29315
1.16646
1.91091
0.866942
1.22918
1.31504
1.6626
1.07045
1.15883
1.24919
1.24707
1.42365
0.614954
0.909518
1.32647
2.78599
1.36141
1.19563
1.34805
0.822171
0.87869
1.42863
1.52948
1.42816
1.64466
1.19932
0.864851
1.0967
1.1797
1.46049
0.906761
1.29608
1.19203
1.43832
1.67576
1.58472
1.36194

## Sheet: panel m left
Radial distance for Uncorrected (x)	Pairwise correlation for Uncorrected (y)	Linear regression fit of data (x) for Uncorrected	Linear regression fit of data (y) for Uncorrected	Lower 95% confidence interval for Uncorrected (y)	Upper 95% confidence interval for Uncorrected (y)
28.5459	0.189594	14.6517	0.414454	0.333699	0.495208
86.3093	0.17175	26.277	0.4168	0.344492	0.489107
27.857	0.116788	27.857	0.417119	0.345944	0.488293
33.0192	0.0774424	28.5459	0.417258	0.346576	0.487939
60.2099	0.588571	32.0502	0.417965	0.349777	0.486152
143.657	0.430931	32.2837	0.418012	0.34999	0.486034
121.367	0.710117	33.0192	0.41816	0.350659	0.485662
111.275	0.483214	33.5773	0.418273	0.351166	0.485381
37.695	0.233153	33.7415	0.418306	0.351315	0.485298
118.806	0.551032	35.9616	0.418754	0.353323	0.484185
110.31	0.712764	37.695	0.419104	0.354885	0.483323
122.203	0.753803	44.6582	0.420509	0.361084	0.479934
118.909	0.840914	52.9792	0.422189	0.368308	0.476069
113.489	0.514582	55.7454	0.422747	0.370655	0.474839
150.8	0.504914	56.9548	0.422991	0.371671	0.474311
155.814	0.635099	56.9596	0.422992	0.371675	0.474309
139.536	0.547768	58.4355	0.42329	0.372906	0.473673
74.6745	0.244473	60.2003	0.423646	0.374365	0.472926
156.294	0.521507	60.2099	0.423648	0.374373	0.472922
198.921	0.633138	62.3185	0.424073	0.376096	0.472051
131.829	0.278398	63.6994	0.424352	0.377211	0.471493
109.097	0.785008	64.08	0.424429	0.377517	0.471341
82.7562	0.815959	64.2413	0.424461	0.377646	0.471277
80.693	0.183083	64.4263	0.424499	0.377794	0.471204
100.128	0.472966	66.2027	0.424857	0.379205	0.47051
84.0825	0.208826	66.6872	0.424955	0.379587	0.470324
114.816	0.625032	67.4749	0.425114	0.380204	0.470025
82.1934	0.418961	69.6379	0.425551	0.381877	0.469225
113.475	0.568973	69.6992	0.425563	0.381923	0.469202
153.482	0.602873	71.6561	0.425958	0.383407	0.468508
66.2027	0.479767	73.1674	0.426263	0.384533	0.467992
141	0.908853	73.1745	0.426264	0.384539	0.46799
133.544	0.601809	74.6745	0.426567	0.385638	0.467496
151.242	0.110139	75.0564	0.426644	0.385914	0.467374
103.646	0.477231	75.5109	0.426736	0.386242	0.46723
96.8475	0.228594	76.4441	0.426924	0.386909	0.466939
86.5126	0.214711	78.4213	0.427323	0.388295	0.466351
32.0502	0.257123	79.6594	0.427573	0.389143	0.466003
140.632	0.484615	79.9844	0.427639	0.389363	0.465914
142.046	0.439476	80.3898	0.42772	0.389636	0.465805
144.835	0.123129	80.693	0.427782	0.389839	0.465724
64.08	0.685868	81.6697	0.427979	0.390486	0.465472
56.9596	0.240889	82.1181	0.428069	0.390779	0.465359
73.1674	0.438785	82.1335	0.428072	0.390789	0.465356
149.019	0.60737	82.1934	0.428084	0.390828	0.465341
126.972	0.260881	82.7562	0.428198	0.391193	0.465203
67.4749	0.552953	82.9668	0.428241	0.391328	0.465153
140.933	0.210256	83.2621	0.4283	0.391517	0.465083
119.162	0.584168	83.5891	0.428366	0.391725	0.465007
107.774	0.324836	83.5916	0.428367	0.391727	0.465007
107.313	0.408441	84.0825	0.428466	0.392037	0.464895
71.6561	0.171156	84.2537	0.4285	0.392144	0.464856
150.842	0.537887	85.059	0.428663	0.392644	0.464681
133.973	0.409145	85.2874	0.428709	0.392785	0.464633
146.881	0.203294	86.3093	0.428915	0.393405	0.464426
139.489	0.515995	86.5126	0.428956	0.393526	0.464386
84.2537	0.408784	86.9287	0.42904	0.393774	0.464307
187.968	0.311507	88.0629	0.429269	0.394436	0.464102
122.255	0.451668	88.8936	0.429437	0.394909	0.463964
172.422	0.182141	91.9621	0.430056	0.39657	0.463542
83.5916	0.367998	93.9281	0.430453	0.397557	0.463349
83.2621	0.245163	94.406	0.430549	0.397787	0.463311
33.7415	0.331708	96.8475	0.431042	0.398902	0.463182
78.4213	0.293705	97.2452	0.431122	0.399073	0.463171
140.058	0.891551	97.2598	0.431125	0.39908	0.463171
133.077	0.745398	98.7642	0.431429	0.399702	0.463155
151.225	0.109536	99.2576	0.431528	0.399898	0.463159
104.057	0.455205	99.764	0.43163	0.400093	0.463168
97.2598	0.48891	100.128	0.431704	0.400231	0.463177
86.9287	0.5305	100.186	0.431716	0.400252	0.463179
33.5773	0.501773	100.209	0.43172	0.400261	0.46318
140.152	0.509298	102.32	0.432146	0.401005	0.463288
141.098	0.313008	103.646	0.432414	0.401428	0.4634
146.745	0.213038	104.057	0.432497	0.401552	0.463442
63.6994	0.743542	105.614	0.432811	0.40199	0.463632
56.9548	0.568285	105.789	0.432846	0.402036	0.463656
73.1745	0.721721	105.837	0.432856	0.402049	0.463663
149.027	0.622881	106.106	0.43291	0.402119	0.463702
125.176	0.428415	106.509	0.432992	0.40222	0.463763
66.6872	0.672802	107.101	0.433111	0.402363	0.463859
139.06	0.52768	107.313	0.433154	0.402413	0.463895
120.927	0.832604	107.774	0.433247	0.402517	0.463977
109.927	0.538611	109.087	0.433512	0.402791	0.464233
105.614	0.627478	109.097	0.433514	0.402793	0.464235
69.6992	0.607812	109.927	0.433682	0.402947	0.464416
148.915	0.785845	110.31	0.433759	0.403014	0.464504
135.813	0.72046	111.275	0.433953	0.403168	0.464739
144.976	0.425518	113.456	0.434394	0.403448	0.46534
137.626	0.897818	113.475	0.434398	0.40345	0.465345
85.059	0.627214	113.489	0.4344	0.403451	0.465349
187.426	0.308696	114.816	0.434668	0.403574	0.465763
121.802	0.606152	116.041	0.434915	0.403656	0.466175
173.453	0.372495	118.806	0.435473	0.403734	0.467212
83.5891	0.629509	118.909	0.435494	0.403734	0.467254
85.2874	0.517309	119.162	0.435545	0.403734	0.467357
35.9616	0.536173	120.032	0.435721	0.403723	0.467718
76.4441	0.568612	120.092	0.435733	0.403722	0.467744
125.637	0.11773	120.927	0.435901	0.403698	0.468105
58.4355	0.246446	121.367	0.43599	0.40368	0.4683
60.2003	0.26186	121.802	0.436078	0.403659	0.468497
32.2837	0.19872	122.203	0.436159	0.403637	0.468681
99.764	0.172588	122.255	0.436169	0.403634	0.468705
98.7642	0.0596284	123.448	0.43641	0.403551	0.469269
107.101	0.335189	125.176	0.436759	0.403388	0.47013
134.314	0.332463	125.637	0.436852	0.403337	0.470367
164.1	0.379699	126.972	0.437121	0.403169	0.471074
151.934	0.28442	129.16	0.437563	0.402835	0.472291
135.348	0.255616	129.954	0.437723	0.402697	0.47275
141.157	0.204595	131.829	0.438102	0.402337	0.473867
148.56	0.3308	133.077	0.438353	0.402071	0.474636
150.802	0.125813	133.544	0.438448	0.401967	0.474928
141.557	0.299412	133.949	0.438529	0.401874	0.475184
79.6594	0.301127	133.973	0.438534	0.401869	0.4752
82.1181	0.259964	134.314	0.438603	0.401789	0.475417
143.476	0.169671	135.348	0.438812	0.401539	0.476084
109.087	0.219946	135.813	0.438906	0.401423	0.476389
144.04	0.323289	137.626	0.439272	0.400946	0.477597
120.032	0.513595	138.626	0.439473	0.400668	0.478278
133.949	0.400907	139.06	0.439561	0.400544	0.478578
149.548	0.305809	139.489	0.439648	0.40042	0.478875
144.988	0.304195	139.536	0.439657	0.400406	0.478908
154.126	0.264331	140.058	0.439762	0.400253	0.479272
44.6582	0.0763029	140.152	0.439781	0.400225	0.479338
82.9668	0.227208	140.632	0.439878	0.40008	0.479676
196.892	0.198312	140.933	0.439939	0.399989	0.479889
187.902	0.0868453	141	0.439952	0.399968	0.479936
138.626	0.236022	141.098	0.439972	0.399938	0.480006
79.9844	0.208011	141.157	0.439984	0.39992	0.480048
81.6697	0.228298	141.557	0.440065	0.399797	0.480333
105.837	0.303934	142.046	0.440164	0.399643	0.480684
91.9621	0.499462	143.476	0.440452	0.399183	0.481721
106.509	0.903548	143.619	0.440481	0.399136	0.481826
64.2413	0.509353	143.657	0.440489	0.399123	0.481854
129.954	0.41355	143.903	0.440538	0.399042	0.482035
144.146	0.701959	143.936	0.440545	0.399031	0.482059
146.873	0.537845	144.04	0.440566	0.398996	0.482135
143.903	0.269588	144.146	0.440587	0.398961	0.482213
75.0564	0.746313	144.835	0.440726	0.398729	0.482724
129.16	0.257338	144.855	0.44073	0.398722	0.482739
105.789	0.517747	144.976	0.440755	0.398681	0.482829
93.9281	0.795099	144.988	0.440757	0.398677	0.482837
88.8936	0.670161	146.745	0.441112	0.398067	0.484157
100.209	0.537978	146.873	0.441138	0.398021	0.484254
55.7454	0.492631	146.881	0.441139	0.398018	0.48426
62.3185	0.347783	148.56	0.441478	0.397412	0.485544
97.2452	0.60279	148.915	0.44155	0.397281	0.485819
120.092	0.379945	149.019	0.441571	0.397243	0.485899
75.5109	0.582294	149.027	0.441572	0.39724	0.485905
88.0629	0.378152	149.548	0.441678	0.397046	0.48631
82.1335	0.324067	150.8	0.44193	0.396572	0.487288
116.041	0.41138	150.802	0.441931	0.396572	0.487289
143.936	0.733247	150.842	0.441939	0.396556	0.487321
106.106	0.516143	151.225	0.442016	0.396409	0.487623
26.277	0.435269	151.242	0.442019	0.396403	0.487636
14.6517	0.309214	151.934	0.442159	0.396135	0.488183
64.4263	0.496104	153.482	0.442472	0.395525	0.489418
144.855	0.252001	154.126	0.442602	0.395268	0.489935
100.186	0.37311	155.814	0.442942	0.394581	0.491303
99.2576	0.421102	156.294	0.443039	0.394383	0.491695
102.32	0.749381	164.1	0.444614	0.391012	0.498217
113.456	0.475809	170.328	0.445871	0.388148	0.503595
94.406	0.332188	172.422	0.446294	0.387157	0.505431
52.9792	0.287962	173.453	0.446502	0.386665	0.506339
123.448	0.450287	187.426	0.449322	0.379735	0.518909
143.619	0.413497	187.902	0.449418	0.379491	0.519345
170.328	0.287338	187.968	0.449431	0.379458	0.519404
69.6379	0.607367	196.892	0.451232	0.374832	0.527632
80.3898	0.429396	198.921	0.451642	0.373764	0.529519

## Sheet: panel m right
Corrected_Dataset 1							Corrected_Dataset 2
Radial distance(x)	Pairwise correlation (y)	Linear regression fit of data (x)	Linear regression fit of data (y)	Lower 95% confidence interval (y)	Upper 95% confidence interval (y)		Radial distance(x)	Pairwise correlation (y)	Linear regression fit of data (x)	Linear regression fit of data (y)	Lower 95% confidence interval (y)	Upper 95% confidence interval (y)
163.18	0.00932635	20.3994	0.133563	0.0145412	0.252584		139.095	0.443649	7.95625	0.34949	0.262956	0.436025
105.948	-0.00825953	22.7283	0.132456	0.0158769	0.249036		154.124	0.212042	7.96326	0.349486	0.262956	0.436015
99.5101	0.241379	27.8855	0.130007	0.0187802	0.241234		155.909	0.22628	9.4756	0.348462	0.263024	0.433901
85.8263	0.286431	31.2779	0.128396	0.0206446	0.236147		46.8506	0.481707	23.5111	0.338967	0.26344	0.414495
174.437	0.0240637	58.0663	0.115672	0.0335524	0.197791		28.4442	0.503625	24.2562	0.338463	0.26345	0.413477
90.0832	0.234597	58.6513	0.115394	0.0337854	0.197003		32.2994	0.469996	24.6573	0.338192	0.263455	0.412929
99.8661	0.0176603	58.989	0.115234	0.0339185	0.196549		61.7684	0.457714	25.0304	0.33794	0.263459	0.412421
112.472	0.572563	62.1458	0.113734	0.0351176	0.192351		72.3939	0.460199	28.4442	0.33563	0.263478	0.407783
31.2779	0.107718	70.7963	0.109625	0.0379147	0.181336		150.364	0.429815	28.4557	0.335622	0.263478	0.407767
58.0663	0.0404402	83.5315	0.103577	0.0403366	0.166817		117.631	0.466012	28.8324	0.335367	0.263478	0.407257
143.76	0.388851	85.8263	0.102487	0.040502	0.164471		119.876	0.465004	29.2171	0.335107	0.263477	0.406737
136.327	0.155311	87.5161	0.101684	0.0405624	0.162806		82.2315	0.389122	31.1256	0.333816	0.263469	0.404163
122.522	0.249943	90.0832	0.100465	0.0405488	0.160381		121.872	0.43171	31.8934	0.333297	0.263463	0.403131
27.8855	0.0411375	92.8608	0.0991454	0.0403831	0.157908		109.879	0.485371	32.2994	0.333022	0.263458	0.402586
165.909	-0.141329	99.5101	0.0959872	0.0392958	0.152679		56.0521	0.530659	38.4685	0.328849	0.263326	0.394371
166.64	0.0331672	99.8661	0.0958181	0.0392085	0.152428		162.052	0.306288	43.6104	0.32537	0.263105	0.387635
113.917	0.367719	101.745	0.0949259	0.0386974	0.151154		154.124	-0.0123362	46.8506	0.323178	0.262906	0.383451
92.8608	0.0928922	105.948	0.0929292	0.0372373	0.148621		121.358	0.416188	50.3224	0.320829	0.262635	0.379024
20.3994	0.0534735	112.472	0.0898304	0.0340867	0.145574		179.83	0.361202	51.9723	0.319713	0.262483	0.376944
22.7283	0.134612	113.917	0.0891444	0.0332434	0.145045		108.355	0.428999	52.3379	0.319466	0.262447	0.376485
146.218	0.130582	119.45	0.0865161	0.0295354	0.143497		69.8173	0.25418	56.0521	0.316953	0.262039	0.371868
182.242	-0.137502	121.664	0.0854647	0.0278469	0.143083		169.29	0.432067	59.2924	0.314761	0.261609	0.367913
189.416	-0.309864	122.522	0.0850573	0.0271623	0.142952		162.099	0.41081	61.0692	0.313559	0.261342	0.365776
134.693	0.0207614	134.693	0.0792765	0.0157912	0.142762		158.283	0.397356	61.7684	0.313086	0.261231	0.364942
70.7963	0.113502	136.327	0.0785	0.0140528	0.142947		163.993	0.0789484	63.9419	0.311616	0.260859	0.362373
83.5315	0.0456552	143.76	0.0749699	0.00562845	0.144311		104.5	0.312431	65.6295	0.310474	0.260544	0.360405
58.989	0.0106335	146.218	0.0738023	0.0026741	0.14493		31.8934	0.3623	68.9597	0.308221	0.259848	0.356595
58.6513	0.0271165	152.199	0.0709614	-0.00480957	0.146732		98.9687	0.378571	69.8173	0.307641	0.259652	0.35563
155	-0.0335282	155	0.069631	-0.00844215	0.147704		95.1066	0.189954	72.3939	0.305898	0.259019	0.352777
162.426	0.235594	162.426	0.0661038	-0.0184055	0.150613		24.6573	0.247186	72.4308	0.305873	0.259009	0.352737
152.199	0.101628	163.18	0.0657459	-0.0194405	0.150932		135.095	0.351831	80.3519	0.300514	0.256603	0.344426
62.1458	-0.0804607	165.909	0.0644496	-0.0232221	0.152121		68.9597	0.413693	82.2315	0.299243	0.25592	0.342566
101.745	0.051066	166.64	0.0641021	-0.0242441	0.152448		167.991	0.489226	82.6468	0.298962	0.255762	0.342161
87.5161	-0.0630078	174.437	0.0603988	-0.0353329	0.15613		160.865	0.476961	84.5815	0.297653	0.254999	0.340307
121.664	0.186905	182.242	0.0566916	-0.0467379	0.160121		156.423	0.483313	88.1383	0.295247	0.253458	0.337035
119.45	0.0942517	189.416	0.0532843	-0.0574352	0.164004		162.721	0.349386	90.5368	0.293624	0.252314	0.334934
							103.509	0.501928	93.6794	0.291498	0.250681	0.332315
							31.1256	0.475766	95.1066	0.290533	0.249888	0.331177
							98.0152	0.487827	95.6219	0.290184	0.249594	0.330775
							93.6794	0.385373	96.5517	0.289555	0.249052	0.330058
							23.5111	0.25148	97.5132	0.288905	0.248476	0.329333
							133.4	0.478704	98.0152	0.288565	0.24817	0.32896
							142.115	0.3792	98.9687	0.28792	0.247577	0.328263
							61.0692	0.19287	100.526	0.286867	0.246576	0.327158
							59.2924	0.237631	101.911	0.28593	0.245651	0.326208
							176.446	0.333908	103.509	0.284849	0.244546	0.325152
							158.911	0.318275	104.35	0.284279	0.243946	0.324613
							159.542	0.178847	104.5	0.284178	0.243838	0.324517
							192.94	0.0720181	104.861	0.283934	0.243577	0.32429
							65.6295	-0.275471	105.858	0.283259	0.242843	0.323675
							43.6104	0.239258	107.848	0.281913	0.241331	0.322495
							80.3519	0.137137	108.355	0.28157	0.240935	0.322205
							154.579	-0.0574263	109.879	0.280539	0.239721	0.321357
							72.4308	0.316648	110.507	0.280115	0.239211	0.321019
							138.576	-0.227714	117.631	0.275295	0.232988	0.317602
							29.2171	0.101201	119.876	0.273776	0.230873	0.316679
							50.3224	0.386117	121.358	0.272773	0.229439	0.316108
							38.4685	-0.111935	121.872	0.272426	0.228935	0.315917
							52.3379	0.348662	131.734	0.265754	0.218632	0.312875
							110.507	0.0780281	133.4	0.264627	0.216786	0.312468
							100.526	0.3246	135.095	0.26348	0.214878	0.312082
							105.858	-0.0137616	136.825	0.26231	0.212903	0.311716
							97.5132	0.122027	138.576	0.261126	0.210878	0.311373
							25.0304	0.192189	139.095	0.260774	0.210272	0.311276
							51.9723	0.451496	140.916	0.259542	0.20813	0.310955
							160.814	-0.0739838	142.115	0.258732	0.206705	0.310758
							63.9419	0.156754	142.681	0.258348	0.206028	0.310668
							160.789	0.0795353	145.528	0.256423	0.20259	0.310256
							140.916	0.308628	146.726	0.255612	0.201125	0.310099
							28.8324	0.365133	150.364	0.253151	0.196621	0.30968
							104.861	0.0499404	150.983	0.252732	0.195847	0.309617
							146.726	0.198294	154.124	0.250607	0.191884	0.309331
							84.5815	-0.177804	154.579	0.250299	0.191304	0.309294
							145.528	0.1416	155.909	0.2494	0.189608	0.309192
							101.911	-0.296181	156.423	0.249052	0.188948	0.309155
							82.6468	0.343136	158.283	0.247794	0.186555	0.309032
							7.95625	0.466893	158.911	0.247369	0.185742	0.308995
							96.5517	0.391809	159.542	0.246942	0.184925	0.308959
							90.5368	0.193356	160.789	0.246098	0.183303	0.308893
							88.1383	0.414223	160.814	0.246081	0.183271	0.308891
							142.681	0.224914	160.865	0.246047	0.183205	0.308889
							28.4557	0.549868	162.052	0.245244	0.181655	0.308833
							136.825	0.00360905	162.099	0.245212	0.181593	0.30883
							7.96326	0.435205	162.721	0.244791	0.180779	0.308804
							107.848	0.303777	162.816	0.244727	0.180654	0.3088
							24.2562	0.559148	163.993	0.24393	0.179108	0.308753
							9.4756	0.487873	167.991	0.241226	0.173816	0.308636
							104.35	0.462304	169.29	0.240347	0.172084	0.308611
							95.6219	0.0988204	176.446	0.235506	0.162445	0.308568
							131.734	0.157568	179.83	0.233217	0.157836	0.308599
							162.816	0.179907	192.94	0.224348	0.139727	0.308969
							150.983	0.403242
