# Supplementary material for: Extended field-of-view ultrathin microendoscopes for high-resolution two-photon imaging with minimal invasiveness
Source: eLife. 2020 Oct 13;9:e58882. doi: 10.7554/eLife.58882 (PMC7685710; doi:10.7554/eLife.58882)
Supplement: Figure 5—source data 1. [file elife-58882-fig5-data1.xlsx]

## Sheet: Panel f
	Implanted		Control
Mouse	Red ret.	eGFP	Red ret.	eGFP
1	0.872667	19.88	1.89667	13.84
2	1.701	12.7387	0.456667	13.8767
3	2.272	13.76	2.55333	24.0033
Average	1.61522	15.4596	1.63556	17.24
sd	0.574486	3.15341	0.875647	4.78242
