# Supplementary material for: Extended field-of-view ultrathin microendoscopes for high-resolution two-photon imaging with minimal invasiveness
Source: eLife. 2020 Oct 13;9:e58882. doi: 10.7554/eLife.58882 (PMC7685710; doi:10.7554/eLife.58882)
Supplement: Figure 6—source data 1. [file elife-58882-fig6-data1.xlsx]

## Sheet: panel e
Frames (%)
Q	W	WL	L
72.625	4.625	22.25	0.5			MEAN	SEM
63.375	10.25	24.875	1.5		Q	52.4688	2.90568
55.625	21	21.875	1.5		W	25.9688	3.34014
42.125	23.75	25.75	8.375		WL	20.3906	2.53349
59.875	17.5	22.125	0.5		L	1.17188	0.545994
47.5	23.875	27.5	1.125
58.5	26	4.75	10.75
84.875	3.125	12	0
78.25	1.75	19.375	0.625
64.125	3.75	32.125	0
58.875	10.5	30.625	0
39.75	11.75	48.375	0.125
62.375	37.625	0	0
35.125	56.25	8.625	0
40.5	52.25	7.25	0
50.125	23.25	26.375	0.25
47	46.875	6.125	0
35.5	25.75	38.75	0
48.375	39.25	10.25	2.125
42.875	42.625	14.5	0
51	32.375	16.625	0
57.125	32.75	9.375	0.75
30.75	26.375	42.875	0
33	50	17	0

## Sheet: panel f
	Average ΔF/F0 across ROIs in 24 time series
	Time series 1	Time series 2	Time series 3	Time series 4	Time series 5	Time series 6	Time series 7	Time series 8	Time series 9	Time series 10	Time series 11	Time series 12	Time series 13	Time series 14	Time series 15	Time series 16	Time series 17	Time series 18	Time series 19	Time series 20	Time series 21	Time series 22	Time series 23	Time series 24			MEAN	SEM
Q	0.0310725	0.0472077	0.0476586	0.0636132	0.181367	0.229683	0.179366	0.146666	0.135487	0.141767	0.11915	0.0876183	0.176524	0.121107	0.129344	0.191953	0.193845	0.187368	0.180373	0.129035	0.162408	0.244941	0.174225	0.124053		Q	0.142743	0.0115427
W	0.0727223	0.0596178	0.0441136	0.0624643	0.212397	0.23404	0.219419	0.218433	0.225752	0.181568	0.185847	0.117565	0.33886	0.139135	0.142926	0.201927	0.217649	0.262587	0.214229	0.195946	0.260559	0.316369	0.21341	0.167113		W	0.187694	0.0156202
WL	0.170432	0.149295	0.117884	0.100678	0.426778	0.45677	0.40258	0.345141	0.296843	0.293325	0.285299	0.186905		0.168895	0.232129	0.403841	0.328762	0.482468	0.308045	0.324574	0.414193	0.569214	0.506995	0.349682		WL	0.318292	0.0264421

## Sheet: panel g
	Normalized pupil diameter 0-0.1			Normalized pupil diameter 0.1-0.2			Normalized pupil diameter 0.2-0.3			Normalized pupil diameter 0.3-0.4			Normalized pupil diameter 0.4-0.5			Normalized pupil diameter 0.5-0.6			Normalized pupil diameter 0.6-0.7			Normalized pupil diameter 0.7-0.8			Normalized pupil diameter 0.8-0.9			Normalized pupil diameter 0.9-1
	Frequency MEAN	Frequency SEM		Frequency MEAN	Frequency SEM		Frequency MEAN	Frequency SEM		Frequency MEAN	Frequency SEM		Frequency MEAN	Frequency SEM		Frequency MEAN	Frequency SEM		Frequency MEAN	Frequency SEM		Frequency MEAN	Frequency SEM		Frequency MEAN	Frequency SEM		Frequency MEAN	Frequency SEM
Quiet awake	0.0362213	0.00606389		0.0799432	0.0123757		0.118007	0.0100891		0.161219	0.0114261		0.165965	0.0133092		0.146845	0.0104428		0.106159	0.013803		0.0771223	0.0084138		0.0545905	0.00820056		0.0372958	0.00594533
Whisking	0.0139456	0.00319787		0.0527596	0.0125579		0.0844784	0.0143797		0.121954	0.0148535		0.153767	0.0112685		0.161447	0.0179407		0.155153	0.0159933		0.113844	0.0142294		0.0826127	0.0139793		0.0598208	0.0116651
Whisking + locomotion	0.00283124	0.00181726		0.00362164	0.0015337		0.0127415	0.00567738		0.0304214	0.0109878		0.065805	0.0191235		0.0954186	0.0195114		0.117759	0.0142078		0.161608	0.0190046		0.255869	0.0216679		0.253925	0.0297403
