# Supplementary material for: Extended field-of-view ultrathin microendoscopes for high-resolution two-photon imaging with minimal invasiveness
Source: eLife. 2020 Oct 13;9:e58882. doi: 10.7554/eLife.58882 (PMC7685710; doi:10.7554/eLife.58882)
Supplement: Figure 7—source data 1. — Values of cell-specific and population information analysis. [file elife-58882-fig7-data1.xlsx]

## Sheet: panel b
Information (bits) (x)	# of ROIs (y)		Fit (x)	Fit (y)
0.292559	1		0.383059	0
0.278149	2		0.298535	1
0.154667	3		0.238182	2
0.148664	4		0.195028	3
0.143307	5		0.164114	4
0.13154	6		0.141908	5
0.111859	7		0.125902	6
0.109856	8		0.114308	7
0.108179	9		0.105854	8
0.103839	10		0.0996367	9
0.101842	11		0.0950123	10
0.101694	12		0.0915229	11
0.0932856	13		0.0888426	12
0.0932369	14		0.0867397	13
0.093166	15		0.0850492	14
0.092973	16		0.0836537	15
0.0926338	17		0.0824696	16
0.0901436	18		0.0814377	17
0.0891167	19		0.0805155	18
0.085629	20		0.079673	19
0.0830326	21		0.0788886	20
0.0823765	22		0.0781472	21
0.0806586	23		0.0774379	22
0.0796813	24		0.0767529	23
0.0791399	25		0.0760866	24
0.0790826	26		0.0754353	25
0.0780436	27		0.0747959	26
0.0765132	28		0.0741666	27
0.0762835	29		0.0735458	28
0.0756441	30		0.0729325	29
0.0750525	31		0.072326	30
0.0744573	32		0.0717257	31
0.0743645	33		0.0711313	32
0.0732256	34		0.0705424	33
0.07309	35		0.0699587	34
0.0719273	36		0.0693802	35
0.0715148	37		0.0688067	36
0.0674509	38		0.0682381	37
0.0671157	39		0.0676743	38
0.0664759	40		0.0671152	39
0.0641367	41		0.0665609	40
0.0630852	42		0.0660111	41
0.0624102	43		0.0654659	42
0.060744	44		0.0649252	43
0.0606125	45		0.064389	44
0.0599246	46		0.0638572	45
0.0594002	47		0.0633299	46
0.0582177	48		0.0628068	47
0.0581919	49		0.0622882	48
0.0579658	50		0.0617738	49
0.0567369	51		0.0612636	50
0.0555896	52		0.0607577	51
0.0545202	53		0.0602559	52
0.0543728	54		0.0597583	53
0.0529271	55		0.0592648	54
0.0524816	56		0.0587754	55
0.0522816	57		0.05829	56
0.0521892	58		0.0578087	57
0.0511605	59		0.0573313	58
0.0509453	60		0.0568578	59
0.0503415	61		0.0563883	60
0.0503383	62		0.0559226	61
0.0498522	63		0.0554608	62
0.0494806	64		0.0550028	63
0.0492098	65		0.0545485	64
0.0483584	66		0.0540981	65
0.0478175	67		0.0536513	66
0.0464572	68		0.0532082	67
0.0463306	69		0.0527688	68
0.0460617	70		0.0523331	69
0.046039	71		0.0519009	70
0.045945	72		0.0514723	71
0.045428	73		0.0510472	72
0.0449682	74		0.0506256	73
0.0447997	75		0.0502076	74
0.0443871	76		0.0497929	75
0.0439473	77		0.0493817	76
0.0435496	78		0.0489739	77
0.0434561	79		0.0485695	78
0.0432557	80		0.0481684	79
0.0432083	81		0.0477706	80
0.0430157	82		0.0473761	81
0.0429477	83		0.0469849	82
0.0427101	84		0.0465969	83
0.0426634	85		0.046212	84
0.0426394	86		0.0458304	85
0.0424099	87		0.0454519	86
0.0422477	88		0.0450766	87
0.0417904	89		0.0447043	88
0.0415795	90		0.0443352	89
0.0415464	91		0.043969	90
0.0414967	92		0.0436059	91
0.0413985	93		0.0432458	92
0.0413069	94		0.0428887	93
0.0395012	95		0.0425345	94
0.039289	96		0.0421832	95
0.0392805	97		0.0418349	96
0.038867	98		0.0414894	97
0.0386362	99		0.0411468	98
0.037808	100		0.040807	99
0.037785	101		0.04047	100
0.0372961	102		0.0401358	101
0.0364831	103		0.0398043	102
0.0363718	104		0.0394756	103
0.0360397	105		0.0391496	104
0.0360183	106		0.0388263	105
0.0360164	107		0.0385057	106
0.0358376	108		0.0381877	107
0.0356502	109		0.0378723	108
0.0355506	110		0.0375595	109
0.0354384	111		0.0372494	110
0.0350226	112		0.0369418	111
0.0349598	113		0.0366367	112
0.0337748	114		0.0363341	113
0.0337636	115		0.0360341	114
0.0337313	116		0.0357365	115
0.0336988	117		0.0354414	116
0.0334534	118		0.0351487	117
0.0332125	119		0.0348584	118
0.0318291	120		0.0345706	119
0.0317404	121		0.0342851	120
0.0313495	122		0.0340019	121
0.0312849	123		0.0337211	122
0.0312829	124		0.0334427	123
0.0312762	125		0.0331665	124
0.0304155	126		0.0328926	125
0.0304056	127		0.0326209	126
0.0302586	128		0.0323516	127
0.0302036	129		0.0320844	128
0.0301719	130		0.0318194	129
0.0298548	131		0.0315567	130
0.0298185	132		0.0312961	131
0.0297771	133		0.0310376	132
0.029541	134		0.0307813	133
0.0294292	135		0.0305271	134
0.0292594	136		0.030275	135
0.0289099	137		0.030025	136
0.0284615	138		0.029777	137
0.0283419	139		0.0295311	138
0.0281181	140		0.0292872	139
0.0280348	141		0.0290454	140
0.0273498	142		0.0288055	141
0.027216	143		0.0285676	142
0.0271707	144		0.0283317	143
0.0271131	145		0.0280977	144
0.0271125	146		0.0278657	145
0.0269813	147		0.0276356	146
0.0269319	148		0.0274074	147
0.0268027	149		0.027181	148
0.0267244	150		0.0269566	149
0.0266826	151		0.0267339	150
0.026661	152		0.0265132	151
0.0264309	153		0.0262942	152
0.025937	154		0.0260771	153
0.0256009	155		0.0258617	154
0.0254822	156		0.0256482	155
0.0243846	157		0.0254363	156
0.0243167	158		0.0252263	157
0.0243032	159		0.025018	158
0.0239572	160		0.0248114	159
0.0239555	161		0.0246065	160
0.0238603	162		0.0244033	161
0.0237004	163		0.0242017	162
0.0228775	164		0.0240019	163
0.0228385	165		0.0238037	164
0.0227526	166		0.0236071	165
0.0227358	167		0.0234121	166
0.0226074	168		0.0232188	167
0.0225111	169		0.023027	168
0.022385	170		0.0228369	169
0.0221219	171		0.0226483	170
0.0215633	172		0.0224612	171
0.0215437	173		0.0222758	172
0.0214618	174		0.0220918	173
0.0214058	175		0.0219094	174
0.0213654	176		0.0217284	175
0.0209031	177		0.021549	176
0.020736	178		0.021371	177
0.020652	179		0.0211945	178
0.0205019	180		0.0210195	179
0.0204146	181		0.0208459	180
0.0201402	182		0.0206738	181
0.0200016	183		0.020503	182
0.0199634	184		0.0203337	183
0.0196534	185		0.0201658	184
0.0195625	186		0.0199993	185
0.0193767	187		0.0198341	186
0.0192051	188		0.0196703	187
0.0191654	189		0.0195079	188
0.0191457	190		0.0193468	189
0.019113	191		0.019187	190
0.0190132	192		0.0190286	191
0.0189904	193		0.0188714	192
0.0189526	194		0.0187156	193
0.018823	195		0.018561	194
0.0187932	196		0.0184077	195
0.0186221	197		0.0182557	196
0.0186131	198		0.018105	197
0.0185324	199		0.0179554	198
0.0184633	200		0.0178072	199
0.0183623	201		0.0176601	200
0.0180807	202		0.0175143	201
0.0180554	203		0.0173696	202
0.0180176	204		0.0172262	203
0.0176292	205		0.0170839	204
0.0175091	206		0.0169428	205
0.0174266	207		0.0168029	206
0.0170514	208		0.0166642	207
0.0170158	209		0.0165265	208
0.0168681	210		0.0163901	209
0.0168291	211		0.0162547	210
0.0167423	212		0.0161205	211
0.0166525	213		0.0159874	212
0.0165825	214		0.0158553	213
0.0165518	215		0.0157244	214
0.0163997	216		0.0155945	215
0.016192	217		0.0154658	216
0.0161839	218		0.015338	217
0.0161665	219		0.0152114	218
0.0160769	220		0.0150857	219
0.0159895	221		0.0149612	220
0.0159241	222		0.0148376	221
0.0158671	223		0.0147151	222
0.0158571	224		0.0145936	223
0.0158474	225		0.014473	224
0.0157667	226		0.0143535	225
0.0157017	227		0.014235	226
0.0154608	228		0.0141174	227
0.0154147	229		0.0140008	228
0.0152185	230		0.0138852	229
0.0150669	231		0.0137706	230
0.0150106	232		0.0136568	231
0.0146315	233		0.0135441	232
0.0146024	234		0.0134322	233
0.0145628	235		0.0133213	234
0.014234	236		0.0132113	235
0.0142296	237		0.0131022	236
0.0140132	238		0.012994	237
0.013978	239		0.0128867	238
0.01395	240		0.0127802	239
0.0137153	241		0.0126747	240
0.0136797	242		0.01257	241
0.0136075	243		0.0124662	242
0.0135199	244		0.0123633	243
0.013344	245		0.0122612	244
0.0131835	246		0.0121599	245
0.0130796	247		0.0120595	246
0.0130719	248		0.0119599	247
0.0130399	249		0.0118611	248
0.013034	250		0.0117632	249
0.0130251	251		0.011666	250
0.0129689	252		0.0115697	251
0.0128882	253		0.0114742	252
0.0128013	254		0.0113794	253
0.0126395	255		0.0112854	254
0.0124849	256		0.0111922	255
0.0124366	257		0.0110998	256
0.0123746	258		0.0110081	257
0.0123579	259		0.0109172	258
0.0123556	260		0.0108271	259
0.0120384	261		0.0107377	260
0.0120104	262		0.010649	261
0.0117773	263		0.010561	262
0.0116757	264		0.0104738	263
0.0115406	265		0.0103873	264
0.011504	266		0.0103016	265
0.0114379	267		0.0102165	266
0.0113896	268		0.0101321	267
0.0113685	269		0.0100484	268
0.0113527	270		0.00996545	269
0.0113285	271		0.00988316	270
0.0112956	272		0.00980154	271
0.0112574	273		0.0097206	272
0.0111375	274		0.00964032	273
0.0111059	275		0.00956071	274
0.0110038	276		0.00948175	275
0.0109639	277		0.00940345	276
0.0109348	278		0.0093258	277
0.0108469	279		0.00924878	278
0.0108324	280		0.0091724	279
0.0108097	281		0.00909666	280
0.0106303	282		0.00902153	281
0.0106261	283		0.00894703	282
0.0105811	284		0.00887314	283
0.0105235	285		0.00879987	284
0.0104163	286		0.0087272	285
0.0103744	287		0.00865513	286
0.0103309	288		0.00858365	287
0.0102705	289		0.00851276	288
0.0101702	290		0.00844246	289
0.0100917	291		0.00837274	290
0.010058	292		0.0083036	291
0.0100311	293		0.00823503	292
0.0100186	294		0.00816702	293
0.0099661	295		0.00809957	294
0.00995944	296		0.00803269	295
0.00990113	297		0.00796635	296
0.00988452	298		0.00790056	297
0.00986105	299		0.00783532	298
0.00966936	300		0.00777061	299
0.00964444	301		0.00770644	300
0.00948305	302		0.0076428	301
0.00942516	303		0.00757968	302
0.00937491	304		0.00751709	303
0.00929644	305		0.00745501	304
0.00925983	306		0.00739345	305
0.00919134	307		0.00733239	306
0.00910935	308		0.00727184	307
0.00907944	309		0.00721178	308
0.00906704	310		0.00715223	309
0.00904574	311		0.00709316	310
0.00902678	312		0.00703459	311
0.00899207	313		0.00697649	312
0.00895424	314		0.00691888	313
0.0089337	315		0.00686174	314
0.0088598	316		0.00680507	315
0.00880296	317		0.00674888	316
0.00878883	318		0.00669314	317
0.00872941	319		0.00663787	318
0.00857842	320		0.00658305	319
0.00857832	321		0.00652869	320
0.00856513	322		0.00647477	321
0.00848512	323		0.0064213	322
0.00846495	324		0.00636827	323
0.0084539	325		0.00631568	324
0.00841458	326		0.00626353	325
0.0084043	327		0.0062118	326
0.0083754	328		0.0061605	327
0.0082935	329		0.00610963	328
0.00828958	330		0.00605917	329
0.00824818	331		0.00600914	330
0.00824333	332		0.00595951	331
0.00822706	333		0.0059103	332
0.00819228	334		0.00586149	333
0.00808808	335		0.00581308	334
0.00805064	336		0.00576508	335
0.00794186	337		0.00571747	336
0.00786229	338		0.00567025	337
0.00779639	339		0.00562342	338
0.00779337	340		0.00557698	339
0.00774687	341		0.00553093	340
0.00765895	342		0.00548525	341
0.00765	343		0.00543995	342
0.00764448	344		0.00539503	343
0.00760743	345		0.00535048	344
0.00759341	346		0.00530629	345
0.00757956	347		0.00526247	346
0.00756622	348		0.00521901	347
0.00750874	349		0.00517591	348
0.00739394	350		0.00513317	349
0.00735307	351		0.00509078	350
0.00733681	352		0.00504874	351
0.00726681	353		0.00500704	352
0.00725645	354		0.00496569	353
0.0072091	355		0.00492469	354
0.00714342	356		0.00488402	355
0.00711668	357		0.00484368	356
0.00707644	358		0.00480368	357
0.00700475	359		0.00476401	358
0.00688324	360		0.00472467	359
0.00681498	361		0.00468565	360
0.00681095	362		0.00464696	361
0.00680273	363		0.00460858	362
0.00675552	364		0.00457052	363
0.00672869	365		0.00453278	364
0.00660733	366		0.00449535	365
0.00658802	367		0.00445822	366
0.00647828	368		0.00442141	367
0.00642102	369		0.00438489	368
0.00638509	370		0.00434868	369
0.00629415	371		0.00431277	370
0.00626922	372		0.00427715	371
0.00618287	373		0.00424183	372
0.00614687	374		0.0042068	373
0.00611212	375		0.00417206	374
0.00601709	376		0.00413761	375
0.00593611	377		0.00410344	376
0.00590935	378		0.00406955	377
0.00585314	379		0.00403594	378
0.00581802	380		0.00400261	379
0.00581542	381		0.00396956	380
0.00578052	382		0.00393678	381
0.00571506	383		0.00390427	382
0.00571352	384		0.00387202	383
0.00568885	385		0.00384005	384
0.00564518	386		0.00380834	385
0.00558309	387		0.00377689	386
0.00554003	388		0.0037457	387
0.00550747	389		0.00371476	388
0.00546117	390		0.00368409	389
0.00545204	391		0.00365366	390
0.0054128	392		0.00362349	391
0.00539018	393		0.00359356	392
0.00538804	394		0.00356389	393
0.0053692	395		0.00353446	394
0.00534686	396		0.00350527	395
0.00530443	397		0.00347632	396
0.0052946	398		0.00344761	397
0.00525839	399		0.00341914	398
0.00523113	400		0.00339091	399
0.00520283	401		0.0033629	400
0.00520251	402		0.00333513	401
0.00520197	403		0.00330759	402
0.00513658	404		0.00328027	403
0.00504238	405		0.00325318	404
0.00502364	406		0.00322632	405
0.00501228	407		0.00319968	406
0.00499095	408		0.00317325	407
0.00484697	409		0.00314705	408
0.0048188	410		0.00312106	409
0.00480753	411		0.00309528	410
0.00479729	412		0.00306972	411
0.00478983	413		0.00304437	412
0.00477276	414		0.00301923	413
0.00470417	415		0.0029943	414
0.0047032	416		0.00296957	415
0.00470291	417		0.00294505	416
0.00468559	418		0.00292072	417
0.0046262	419		0.0028966	418
0.00457812	420		0.00287268	419
0.00457628	421		0.00284896	420
0.00455724	422		0.00282543	421
0.00454229	423		0.0028021	422
0.00451978	424		0.00277896	423
0.00447884	425		0.00275601	424
0.00447831	426		0.00273325	425
0.00445901	427		0.00271068	426
0.00441257	428		0.00268829	427
0.00438412	429		0.00266609	428
0.00430304	430		0.00264408	429
0.00427258	431		0.00262224	430
0.00425338	432		0.00260059	431
0.00420599	433		0.00257911	432
0.00412628	434		0.00255781	433
0.00407212	435		0.00253669	434
0.00397006	436		0.00251574	435
0.00388761	437		0.00249496	436
0.00387216	438		0.00247436	437
0.00382563	439		0.00245393	438
0.00379938	440		0.00243366	439
0.00379285	441		0.00241356	440
0.00378295	442		0.00239363	441
0.00376409	443		0.00237386	442
0.00369815	444		0.00235426	443
0.00369453	445		0.00233482	444
0.0036444	446		0.00231554	445
0.00363905	447		0.00229641	446
0.00361853	448		0.00227745	447
0.00360245	449		0.00225864	448
0.00359705	450		0.00223999	449
0.00351762	451		0.00222149	450
0.00350195	452		0.00220315	451
0.00350077	453		0.00218495	452
0.00341061	454		0.00216691	453
0.00341013	455		0.00214901	454
0.00337051	456		0.00213127	455
0.00335988	457		0.00211367	456
0.00335255	458		0.00209621	457
0.0033288	459		0.0020789	458
0.00328737	460		0.00206173	459
0.00319774	461		0.0020447	460
0.00317963	462		0.00202782	461
0.00317939	463		0.00201107	462
0.0031637	464		0.00199447	463
0.00315666	465		0.00197799	464
0.00315076	466		0.00196166	465
0.0031211	467		0.00194546	466
0.00307684	468		0.00192939	467
0.00302607	469		0.00191346	468
0.00299655	470		0.00189766	469
0.00297865	471		0.00188199	470
0.00295202	472		0.00186645	471
0.00294054	473		0.00185103	472
0.00293695	474		0.00183575	473
0.00293168	475		0.00182059	474
0.0029203	476		0.00180555	475
0.00288342	477		0.00179064	476
0.00286583	478		0.00177585	477
0.00284374	479		0.00176119	478
0.00280967	480		0.00174664	479
0.0027961	481		0.00173222	480
0.00277047	482		0.00171791	481
0.00276206	483		0.00170373	482
0.00275712	484		0.00168966	483
0.00270968	485		0.0016757	484
0.00268567	486		0.00166187	485
0.00265922	487		0.00164814	486
0.00263104	488		0.00163453	487
0.00259153	489		0.00162103	488
0.00258587	490		0.00160765	489
0.00250319	491		0.00159437	490
0.00249183	492		0.0015812	491
0.00249006	493		0.00156814	492
0.00246034	494		0.00155519	493
0.00245844	495		0.00154235	494
0.00241873	496		0.00152961	495
0.0023967	497		0.00151698	496
0.00238348	498		0.00150445	497
0.00237865	499		0.00149203	498
0.00237666	500		0.00147971	499
0.0023689	501		0.00146749	500
0.0023644	502		0.00145537	501
0.0023409	503		0.00144335	502
0.00233221	504		0.00143143	503
0.00229931	505		0.00141961	504
0.00229784	506		0.00140789	505
0.00229686	507		0.00139626	506
0.00229615	508		0.00138473	507
0.00227622	509		0.00137329	508
0.00226097	510		0.00136195	509
0.00225184	511		0.00135071	510
0.0022455	512		0.00133955	511
0.00218553	513		0.00132849	512
0.00217634	514		0.00131752	513
0.00215023	515		0.00130664	514
0.00214877	516		0.00129585	515
0.0021246	517		0.00128515	516
0.00211938	518		0.00127453	517
0.00211552	519		0.00126401	518
0.00210778	520		0.00125357	519
0.00208679	521		0.00124322	520
0.00207065	522		0.00123295	521
0.00202381	523		0.00122277	522
0.00200344	524		0.00121267	523
0.00199959	525		0.00120266	524
0.00193844	526		0.00119272	525
0.00189292	527		0.00118287	526
0.00186144	528		0.00117311	527
0.00184366	529		0.00116342	528
0.00184027	530		0.00115381	529
0.00182559	531		0.00114428	530
0.00181771	532		0.00113483	531
0.00179953	533		0.00112546	532
0.00179492	534		0.00111617	533
0.00178767	535		0.00110695	534
0.00178684	536		0.00109781	535
0.00177763	537		0.00108874	536
0.00175959	538		0.00107975	537
0.00172946	539		0.00107083	538
0.00172211	540		0.00106199	539
0.00169533	541		0.00105322	540
0.00168104	542		0.00104452	541
0.00166535	543		0.0010359	542
0.00165231	544		0.00102734	543
0.00160855	545		0.00101886	544
0.00160759	546		0.00101044	545
0.00159355	547		0.0010021	546
0.00153395	548		0.000993823	547
0.0015327	549		0.000985616	548
0.00152803	550		0.000977477	549
0.0015274	551		0.000969405	550
0.00149938	552		0.000961399	551
0.00148362	553		0.00095346	552
0.00143975	554		0.000945586	553
0.00143179	555		0.000937777	554
0.00142639	556		0.000930032	555
0.0014205	557		0.000922352	556
0.00141302	558		0.000914735	557
0.00141185	559		0.000907181	558
0.00139732	560		0.000899689	559
0.00139469	561		0.000892259	560
0.00138089	562		0.000884891	561
0.00137534	563		0.000877583	562
0.00136639	564		0.000870336	563
0.00133584	565		0.000863149	564
0.00129318	566		0.00085602	565
0.00125992	567		0.000848951	566
0.00125262	568		0.00084194	567
0.00122312	569		0.000834987	568
0.00120184	570		0.000828092	569
0.00119638	571		0.000821253	570
0.0011934	572		0.000814471	571
0.00117735	573		0.000807745	572
0.00114095	574		0.000801075	573
0.00111222	575		0.000794459	574
0.00109417	576		0.000787898	575
0.00108115	577		0.000781392	576
0.00107949	578		0.000774939	577
0.00107586	579		0.000768539	578
0.001049	580		0.000762192	579
0.00102016	581		0.000755898	580
0.00101977	582		0.000749656	581
0.00100231	583		0.000743465	582
0.000996345	584		0.000737325	583
0.000992758	585		0.000731236	584
0.000980225	586		0.000725197	585
0.000949823	587		0.000719209	586
0.000936308	588		0.000713269	587
0.000924604	589		0.000707379	588
0.000922614	590		0.000701537	589
0.000899486	591		0.000695744	590
0.000870006	592		0.000689998	591
0.000859145	593		0.0006843	592
0.000840325	594		0.000678649	593
0.000819335	595		0.000673044	594
0.00079742	596		0.000667486	595
0.000795327	597		0.000661974	596
0.000794706	598		0.000656507	597
0.000792064	599		0.000651086	598
0.000778839	600		0.000645709	599
0.000775655	601		0.000640376	600
0.000766956	602		0.000635088	601
0.00074608	603		0.000629843	602
0.000741518	604		0.000624642	603
0.000729206	605		0.000619483	604
0.000721883	606		0.000614368	605
0.000716768	607		0.000609294	606
0.000715335	608		0.000604262	607
0.000686167	609		0.000599272	608
0.00067532	610		0.000594323	609
0.000671167	611		0.000589415	610
0.000648025	612		0.000584548	611
0.00064319	613		0.00057972	612
0.000642105	614		0.000574933	613
0.00064009	615		0.000570185	614
0.000631591	616		0.000565476	615
0.000621898	617		0.000560806	616
0.000614938	618		0.000556175	617
0.000608565	619		0.000551582	618
0.000596884	620		0.000547027	619
0.000594655	621		0.00054251	620
0.000592544	622		0.000538029	621
0.000592544	623		0.000533586	622
0.000589646	624		0.00052918	623
0.000585556	625		0.00052481	624
0.000584805	626		0.000520476	625
0.000560645	627		0.000516177	626
0.000556632	628		0.000511915	627
0.00055511	629		0.000507687	628
0.000548326	630		0.000503495	629
0.000539728	631		0.000499337	630
0.0005375	632		0.000495213	631
0.000527987	633		0.000491123	632
0.00052621	634		0.000487068	633
0.000525482	635		0.000483045	634
0.000520686	636		0.000479056	635
0.000517923	637		0.0004751	636
0.000515738	638		0.000471177	637
0.000480791	639		0.000467286	638
0.000454661	640		0.000463427	639
0.000451257	641		0.000459599	640
0.000447284	642		0.000455804	641
0.000431898	643		0.00045204	642
0.000430673	644		0.000448307	643
0.000429563	645		0.000444605	644
0.000426244	646		0.000440933	645
0.000425889	647		0.000437292	646
0.000381016	648		0.00043368	647
0.00037703	649		0.000430099	648
0.000376983	650		0.000426547	649
0.000376757	651		0.000423025	650
0.000366529	652		0.000419531	651
0.000363936	653		0.000416067	652
0.000362748	654		0.000412631	653
0.00035703	655		0.000409223	654
0.000356664	656		0.000405843	655
0.000354832	657		0.000402492	656
0.000351041	658		0.000399168	657
0.000344186	659		0.000395872	658
0.000332934	660		0.000392602	659
0.000326748	661		0.00038936	660
0.000324682	662		0.000386145	661
0.000322166	663		0.000382956	662
0.000319957	664		0.000379793	663
0.000316887	665		0.000376657	664
0.000315603	666		0.000373546	665
0.000309584	667		0.000370462	666
0.000297941	668		0.000367402	667
0.000290187	669		0.000364368	668
0.000287102	670		0.000361359	669
0.000285073	671		0.000358375	670
0.000272648	672		0.000355415	671
0.00027167	673		0.00035248	672
0.000256503	674		0.000349569	673
0.000256456	675		0.000346683	674
0.000255429	676		0.00034382	675
0.000251324	677		0.00034098	676
0.000249169	678		0.000338164	677
0.000248942	679		0.000335372	678
0.000248856	680		0.000332602	679
0.000243752	681		0.000329855	680
0.000243441	682		0.000327131	681
0.000243096	683		0.00032443	682
0.000240221	684		0.000321751	683
0.000235895	685		0.000319094	684
0.000232535	686		0.000316458	685
0.000228162	687		0.000313845	686
0.000219886	688		0.000311253	687
0.000216375	689		0.000308683	688
0.000199279	690		0.000306134	689
0.000198543	691		0.000303606	690
0.000197007	692		0.000301098	691
0.000186968	693		0.000298612	692
0.000183958	694		0.000296146	693
0.000181374	695		0.0002937	694
0.000177231	696		0.000291275	695
0.000176636	697		0.000288869	696
0.000170768	698		0.000286484	697
0.000169939	699		0.000284118	698
0.000165765	700		0.000281772	699
0.000164495	701		0.000279445	700
0.00016385	702		0.000277137	701
0.000159842	703		0.000274848	702
0.000157743	704		0.000272579	703
0.000152749	705		0.000270328	704
0.000150161	706		0.000268095	705
0.000150027	707		0.000265881	706
0.000148452	708		0.000263685	707
0.000146348	709		0.000261508	708
0.000142928	710		0.000259348	709
0.000139791	711		0.000257206	710
0.000135392	712		0.000255082	711
0.000134266	713		0.000252976	712
0.000132983	714		0.000250887	713
0.000132118	715		0.000248815	714
0.000129331	716		0.00024676	715
0.000128323	717		0.000244722	716
0.000128154	718		0.000242701	717
0.000126418	719		0.000240697	718
0.000125518	720		0.000238709	719
0.000124605	721		0.000236738	720
0.000122931	722		0.000234783	721
0.000120259	723		0.000232844	722
0.0001127	724		0.000230921	723
0.000109259	725		0.000229014	724
0.000108962	726		0.000227123	725
0.000107196	727		0.000225247	726
0.00010398	728		0.000223387	727
0.000102626	729		0.000221542	728
0.000101932	730		0.000219713	729
0.000101269	731		0.000217898	730
0.000100058	732		0.000216099	731
9.67735e-05	733		0.000214314	732
9.44221e-05	734		0.000212544	733
9.3577e-05	735		0.000210789	734
9.10448e-05	736		0.000209048	735
8.68549e-05	737		0.000207322	736
8.30448e-05	738		0.00020561	737
8.01295e-05	739		0.000203912	738
7.98113e-05	740		0.000202228	739
7.90799e-05	741		0.000200558	740
7.68605e-05	742		0.000198902	741
7.64663e-05	743		0.000197259	742
7.64084e-05	744		0.00019563	743
7.24576e-05	745		0.000194015	744
7.1732e-05	746		0.000192412	745
7.10803e-05	747		0.000190823	746
7.02296e-05	748		0.000189248	747
6.85369e-05	749		0.000187685	748
6.77906e-05	750		0.000186135	749
6.73612e-05	751		0.000184598	750
6.29179e-05	752		0.000183073	751
6.21206e-05	753		0.000181561	752
6.13878e-05	754		0.000180062	753
5.98082e-05	755		0.000178575	754
5.56069e-05	756		0.0001771	755
5.42135e-05	757		0.000175638	756
5.39795e-05	758		0.000174187	757
5.24602e-05	759		0.000172749	758
5.16846e-05	760		0.000171322	759
5.13129e-05	761		0.000169907	760
5.02602e-05	762		0.000168504	761
4.89805e-05	763		0.000167113	762
4.87504e-05	764		0.000165733	763
4.78364e-05	765		0.000164364	764
4.75601e-05	766		0.000163007	765
4.68563e-05	767		0.00016166	766
4.61946e-05	768		0.000160325	767
4.5579e-05	769		0.000159001	768
4.52651e-05	770		0.000157688	769
4.46087e-05	771		0.000156386	770
4.39024e-05	772		0.000155095	771
4.35241e-05	773		0.000153814	772
4.34896e-05	774		0.000152544	773
4.32467e-05	775		0.000151284	774
4.28056e-05	776		0.000150035	775
4.16548e-05	777		0.000148795	776
4.0628e-05	778		0.000147567	777
3.937e-05	779		0.000146348	778
3.87914e-05	780		0.000145139	779
3.87105e-05	781		0.000143941	780
3.74753e-05	782		0.000142752	781
3.74684e-05	783		0.000141573	782
3.60329e-05	784		0.000140404	783
3.1072e-05	785		0.000139245	784
3.05061e-05	786		0.000138095	785
3.04634e-05	787		0.000136954	786
2.92293e-05	788		0.000135823	787
2.81697e-05	789		0.000134702	788
2.79777e-05	790		0.000133589	789
2.7741e-05	791		0.000132486	790
2.53854e-05	792		0.000131392	791
2.47125e-05	793		0.000130307	792
2.36954e-05	794		0.000129231	793
2.34841e-05	795		0.000128164	794
2.11255e-05	796		0.000127105	795
2.09619e-05	797		0.000126056	796
1.94882e-05	798		0.000125015	797
1.90144e-05	799		0.000123982	798
1.65904e-05	800		0.000122958	799
1.63151e-05	801		0.000121943	800
1.61694e-05	802		0.000120936	801
1.57533e-05	803		0.000119937	802
1.34948e-05	804		0.000118947	803
6.09565e-06	805		0.000117964	804
3.5652e-06	806		0.00011699	805
1.76331e-06	807		0.000116024	806
1.12159e-06	808		0.000115066	807
			0.000114116	808

## Sheet: panel c
Radial distance (µm) (x)	Information (bits) (y)		Linear regression fit of data (x)	Linear regression fit of data (y)
78.5408	0.00614687		0.761091	0.017979
117.1	0.00238348		3.7998	0.0178857
77.6533	0.0174266		3.7998	0.0178857
98.9503	0.00350077		12.1267	0.0176299
122.407	0.00225184		15.1514	0.017537
172.379	0.00280967		15.1514	0.017537
139.095	0.00857842		16.6644	0.0174906
139.095	0.0083754		17.4212	0.0174673
149.701	0.00590935		18.1783	0.0174441
169.758	0.00937491		18.9356	0.0174208
144.93	0.0103309		20.4514	0.0173743
163.318	0.00904574		22.7282	0.0173043
115.011	0.00351762		24.2486	0.0172576
141.412	0.0100186		25.0097	0.0172343
58.8651	0.0154608		25.7715	0.0172109
176.362	0.0109348		25.7715	0.0172109
63.0214	0.00361853		27.2971	0.017164
148.499	0.00513658		28.061	0.0171405
163.318	0.00525839		29.5913	0.0170935
92.2618	0.00189292		30.3577	0.01707
107.846	0.000729206		31.1251	0.0170464
56.3995	0.0123556		31.1251	0.0170464
164.593	0.00129318		31.8934	0.0170228
99.9218	0.00172946		31.8934	0.0170228
98.9503	0.000686167		32.6627	0.0169992
97.0195	0.000996345		33.4331	0.0169755
116.053	0.0192051		34.2045	0.0169518
106.84	0.0014205		34.977	0.0169281
27.2971	0.00246034		35.7507	0.0169044
157.036	0.00447884		35.7507	0.0169044
107.846	0.00249183		37.3017	0.0168567
64.7013	0.00125992		38.0791	0.0168328
152.122	0.00369453		38.8578	0.0168089
29.5913	0.0111059		41.2022	0.0167369
92.2618	0.00341013		42.7723	0.0166887
148.499	0.00451978		43.5597	0.0166645
62.1852	0.0023689		45.1392	0.016616
155.798	0.00470417		45.9315	0.0165917
61.3516	0.00178767		45.9315	0.0165917
107.846	0.00733681		46.7254	0.0165673
139.095	0.00233221		47.5211	0.0165428
191.49	0.0052946		47.5211	0.0165428
175.027	0.010058		48.3186	0.0165183
37.3017	0.0105811		48.3186	0.0165183
153.341	0.00179953		49.1178	0.0164938
83.0274	0.000366529		49.919	0.0164692
162.049	0.00564518		50.722	0.0164445
160.786	0.00856513		51.5269	0.0164198
77.6533	0.00520251		51.5269	0.0164198
118.152	0.00964444		52.3339	0.016395
112.941	0.0113285		52.3339	0.016395
137.945	0.0047032		53.1428	0.0163702
136.801	0.026661		53.9538	0.0163453
162.049	0.00074608		53.9538	0.0163453
188.676	0.000454661		53.9538	0.0163453
153.341	0.00265922		54.7669	0.0163203
83.9348	0.00558309		54.7669	0.0163203
97.0195	0.00480753		55.5821	0.0162953
165.874	0.00420599		56.3995	0.0162702
72.3939	0.00880296		56.3995	0.0162702
144.93	0.00568885		57.2191	0.016245
154.567	0.000326748		58.041	0.0162197
101.877	0.00819228		58.8651	0.0161944
160.786	0.00948305		58.8651	0.0161944
169.758	0.000319957		59.6915	0.016169
120.27	0.00638509		60.5204	0.0161436
187.28	0.00681498		61.3516	0.0161181
154.567	0.00315666		62.1852	0.0160924
179.05	0.00182559		62.1852	0.0160924
119.208	0.0186131		63.0214	0.0160668
133.4	0.001049		64.7013	0.0160152
111.913	0.0015274		65.5451	0.0159893
58.8651	0.0545202		66.3915	0.0159633
142.579	0.00138089		67.2407	0.0159372
112.941	0.00660733		67.2407	0.0159372
72.3939	0.0150669		68.0925	0.015911
78.5408	0.0084043		68.0925	0.015911
127.839	0.00166535		69.8045	0.0158584
62.1852	0.00457628		69.8045	0.0158584
116.053	0.00895424		70.6648	0.015832
132.277	0.0022455		70.6648	0.015832
181.766	0.0266826		71.5279	0.0158055
155.798	0.000164495		71.5279	0.0158055
155.798	0.000621898		71.5279	0.0158055
155.798	0.00169533		72.3939	0.0157789
162.049	0.0101702		72.3939	0.0157789
155.798	0.00700475		73.2629	0.0157522
175.027	0.00102016		74.1348	0.0157254
29.5913	0.0129689		74.1348	0.0157254
181.766	1.57533e-05		75.0098	0.0156986
55.5821	0.0415464		75.0098	0.0156986
95.1047	0		75.8879	0.0156716
140.251	5.16846e-05		75.8879	0.0156716
58.041	0.000648025		76.769	0.0156445
167.162	0.025937		77.6533	0.0156174
160.786	0.00878883		77.6533	0.0156174
140.251	0.0227358		78.5408	0.0155901
118.152	0.000949823		78.5408	0.0155901
175.027	0.000376983		78.5408	0.0155901
76.769	0.027216		79.4315	0.0155627
75.0098	0.0158474		79.4315	0.0155627
94.1532	0.000255429		80.3255	0.0155353
144.93	0.00148362		81.2228	0.0155077
98.9503	0.00275712		82.1234	0.0154801
96.0601	0.00760743		83.0274	0.0154523
62.1852	0.0354384		83.0274	0.0154523
163.318	0.0029203		83.9348	0.0154244
122.407	0.00120184		83.9348	0.0154244
153.341	0.00064009		84.8457	0.0153965
147.304	0.000870006		85.76	0.0153684
173.7	0.000243096		86.6779	0.0153402
121.336	0.0131835		87.5994	0.0153119
48.3186	0.0023967		88.5245	0.0152835
107.846	0.00779337		89.4533	0.0152549
89.4533	0.0033288		89.4533	0.0152549
107.846	0.0084539		91.3219	0.0151975
34.2045	0.000527987		92.2618	0.0151687
146.114	0.000120259		93.2056	0.0151397
105.839	0.0297771		94.1532	0.0151106
113.974	0.0108324		95.1047	0.0150814
25.0097	0.00237865		95.1047	0.0150814
172.379	0.000169939		95.1047	0.0150814
147.304	7.02296e-05		96.0601	0.015052
49.919	0.0145628		96.0601	0.015052
66.3915	0.00114095		97.0195	0.0150226
137.945	0.00107586		97.0195	0.0150226
162.049	0.00966936		97.0195	0.0150226
111.913	0.000539728		97.9829	0.014993
94.1532	0.0304056		98.9503	0.0149632
109.87	0.0267244		98.9503	0.0149632
103.849	0.00520283		98.9503	0.0149632
61.3516	0.0269319		99.9218	0.0149334
62.1852	0.0356502		100.897	0.0149034
76.769	0.000520686		101.877	0.0148734
99.9218	0.00064319		102.861	0.0148431
171.065	0.000248856		102.861	0.0148431
83.0274	0.0130251		103.849	0.0148128
68.0925	0.0175091		103.849	0.0148128
142.579	0.00538804		104.842	0.0147823
112.941	0.0161665		104.842	0.0147823
18.9356	0.00794186		105.839	0.0147517
126.742	0.00136639		105.839	0.0147517
163.318	0.00226097		105.839	0.0147517
160.786	0.00857832		106.84	0.0147209
172.379	0.00841458		106.84	0.0147209
141.412	0.00108115		107.846	0.01469
163.318	0.000251324		107.846	0.01469
136.801	0.000107196		108.856	0.014659
74.1348	0.0108097		108.856	0.014659
120.27	0.00250319		109.87	0.0146279
72.3939	0.0137153		110.889	0.0145966
175.027	0.00117735		111.913	0.0145651
93.2056	0.0363718		111.913	0.0145651
144.93	0.00100231		112.941	0.0145335
163.318	0		112.941	0.0145335
171.065	0.0521892		112.941	0.0145335
118.152	0.00765		113.974	0.0145018
172.379	0.00438412		115.011	0.01447
163.318	0.020736		116.053	0.014438
69.8045	0.000792064		116.053	0.014438
187.28	0.0106261		117.1	0.0144058
124.565	0.0113685		117.1	0.0144058
113.974	0.00027167		117.1	0.0144058
153.341	0.0201402		118.152	0.0143735
185.891	0.000198543		118.152	0.0143735
63.0214	0.0464572		119.208	0.014341
141.412	0.000376757		119.208	0.014341
153.341	0.00199959		120.27	0.0143084
45.1392	0.00284374		120.27	0.0143084
163.318	0.00119638		120.27	0.0143084
53.1428	0.0594002		121.336	0.0142757
148.499	0.00387216		122.407	0.0142428
101.877	0.0337313		122.407	0.0142428
109.87	0.00786229		123.483	0.0142097
167.162	0.0163997		123.483	0.0142097
171.065	0.00530443		124.565	0.0141765
126.742	0.00899207		125.651	0.0141432
150.909	0.0109639		125.651	0.0141432
100.897	0.0567369		126.742	0.0141096
106.84	0.00237666		126.742	0.0141096
163.318	0.00229931		126.742	0.0141096
140.251	0.0599246		127.839	0.014076
58.041	0.0302036		127.839	0.014076
58.041	0.0271707		128.941	0.0140421
92.2618	0.0176292		130.048	0.0140081
109.87	0.0130796		131.16	0.013974
125.651	0.0140132		132.277	0.0139397
144.93	0.000235895		133.4	0.0139052
157.036	0.000608565		134.528	0.0138705
82.1234	0.0744573		135.662	0.0138357
55.5821	0.00726681		135.662	0.0138357
67.2407	0.00270968		135.662	0.0138357
117.1	0.000517923		136.801	0.0138007
179.05	0		136.801	0.0138007
118.152	0.00249006		137.945	0.0137656
157.036	0.045428		139.095	0.0137302
167.162	0.00846495		139.095	0.0137302
179.05	0.000936308		140.251	0.0136947
188.676	0.0114379		141.412	0.0136591
163.318	0.0447997		141.412	0.0136591
160.786	0.038867		142.579	0.0136232
159.53	0.07309		143.752	0.0135872
116.053	0.0413069		144.93	0.013551
112.941	0.0926338		146.114	0.0135147
53.1428	0.0226074		147.304	0.0134781
153.341	0.0349598		148.499	0.0134414
81.2228	0.000285073		148.499	0.0134414
159.53	0.0102705		149.701	0.0134045
53.9538	0.00942516		149.701	0.0134045
168.457	0.00016385		149.701	0.0134045
144.93	0.0426394		150.909	0.0133674
31.8934	0.0204146		150.909	0.0133674
112.941	0.0159895		152.122	0.0133301
113.974	0.0830326		153.341	0.0132927
143.752	0.0205019		153.341	0.0132927
153.341	0.0301719		154.567	0.013255
143.752	0.0135199		154.567	0.013255
101.877	0.00217634		155.798	0.0132172
96.0601	0.0170158		157.036	0.0131792
25.7715	0.000766956		157.036	0.0131792
96.0601	0.000589646		158.28	0.013141
94.1532	5.42135e-05		158.28	0.013141
17.4212	0.000721883		158.28	0.013141
135.662	0.00578052		159.53	0.0131026
73.2629	0.0289099		160.786	0.013064
134.528	0.0292594		162.049	0.0130252
78.5408	0.000150027		162.049	0.0130252
72.3939	0.000363936		163.318	0.0129863
94.1532	0.0215437		163.318	0.0129863
168.457	0.0443871		164.593	0.0129471
119.208	0.00581542		165.874	0.0129078
117.1	5.24602e-05		167.162	0.0128682
67.2407	0.0298185		168.457	0.0128284
52.3339	0.0762835		168.457	0.0128284
160.786	0.0124366		169.758	0.0127885
31.8934	0.0392805		169.758	0.0127885
94.1532	0.0424099		169.758	0.0127885
157.036	0.0414967		171.065	0.0127483
109.87	0.0579658		171.065	0.0127483
128.941	0.0360397		171.065	0.0127483
18.1783	0.0237004		172.379	0.012708
75.0098	0.00986105		172.379	0.012708
167.162	5.13129e-05		172.379	0.012708
112.941	0.000102626		173.7	0.0126674
176.362	0.00288342		175.027	0.0126266
69.8045	0		175.027	0.0126266
126.742	0.00765895		176.362	0.0125856
144.93	0.00919134		176.362	0.0125856
157.036	0.00902678		176.362	0.0125856
80.3255	0.0011934		177.702	0.0125445
54.7669	0.0671157		177.702	0.0125445
66.3915	0.000354832		179.05	0.0125031
117.1	0.0268027		180.404	0.0124615
177.702	0.0136075		181.766	0.0124197
119.208	0.0460617		183.134	0.0123776
154.567	0.0364831		184.509	0.0123354
167.162	0.000631591		185.891	0.012293
177.702	0.00227622		185.891	0.012293
188.676	0.0483584		187.28	0.0122503
160.786	0.0932369		187.28	0.0122503
160.786	0.101694		188.676	0.0122074
158.28	0.0932856		188.676	0.0122074
116.053	0.101842		191.49	0.012121
111.913	0.0664759		197.203	0.0119455
53.1428	0.0413985
152.122	0.0273498
81.2228	0.0281181
159.53	0.0269813
53.1428	0.0271131
167.162	0.000309584
144.93	0.0796813
31.8934	0.0120104
112.941	0.0790826
112.941	0.148664
143.752	0.0449682
153.341	0.0630852
141.412	0.0674509
101.877	0.0254822
95.1047	0.0750525
25.7715	0.0524816
94.1532	0.00317963
93.2056	0.0432557
16.6644	0.0317404
133.4	0.000344186
74.1348	0.111859
133.4	0.0318291
79.4315	0.060744
71.5279	0.00501228
93.2056	0.0089337
171.065	0.092973
120.27	0.109856
116.053	0.0191457
66.3915	0.0509453
51.5269	0.0302586
159.53	0.0283419
30.3577	0.0522816
96.0601	0.0732256
155.798	0.00035703
109.87	0.103839
126.742	0.093166
18.9356	0.108179
73.2629	0.0498522
165.874	0.0152185
111.913	0.00581802
176.362	3.5652e-06
69.8045	0.0053692
164.593	0.0439473
100.897	0.000100058
88.5245	0.00159355
120.27	0.0146024
127.839	0.00907944
162.049	7.68605e-05
171.065	0.00711668
158.28	0.00647828
147.304	0.00672869
116.053	0.000124605
158.28	0.000322166
184.509	0.000297941
141.412	0.00299655
108.856	0.00499095
134.528	0.00277047
180.404	0
152.122	0.0228385
157.036	0.0166525
181.766	0.00079742
177.702	0.000256456
149.701	0.0113896
134.528	0.0110038
69.8045	0.00211552
52.3339	0.00477276
137.945	0.000157743
112.941	0.00397006
101.877	0.000324682
119.208	0.00268567
95.1047	1.61694e-05
98.9503	0.0165518
56.3995	0.0027961
25.7715	0.00037703
62.1852	0.000142928
50.722	0.000146348
155.798	6.73612e-05
130.048	0.000228162
103.849	0.00412628
86.6779	0.00276206
120.27	0.000515738
80.3255	0.00153395
57.2191	0.0215633
169.758	0.00457812
183.134	0.0021246
160.786	0.00172211
157.036	0.0100917
168.457	0.00618287
162.049	0.00067532
157.036	0.000125518
80.3255	0.00925983
75.0098	0.000315603
162.049	0.000431898
197.203	0.000186968
188.676	0.000775655
73.2629	0.00207065
25.7715	0.013978
167.162	0.0168681
176.362	0.00545204
155.798	0.00376409
106.84	0.0337636
111.913	0.000922614
111.913	0.0312849
134.528	0.0429477
72.3939	0.0165825
58.8651	0.0123746
27.2971	0.0715148
53.9538	0.00177763
37.3017	0.0082935
49.919	0.000592544
84.8457	0.0243167
96.0601	0.0193767
71.5279	0.0492098
115.011	0.00546117
76.769	0.039289
83.9348	0.00680273
162.049	0.0186221
119.208	0.00828958
133.4	0.00378295
104.842	0.00184027
127.839	0.0150106
75.8879	0.0765132
157.036	0.000592544
152.122	0.00571352
108.856	0.00454229
47.5211	0.00211938
68.0925	0.00363905
76.769	0.00178684
107.846	0.00906704
133.4	0.0312829
143.752	0.00441257
152.122	0.0160769
112.941	0.0372961
149.701	0.0298548
37.3017	0.0806586
158.28	0.00995944
169.758	0.00186144
172.379	0.0168291
157.036	0.0427101
142.579	0.0128013
71.5279	0.085629
53.9538	0.00593611
135.662	0.0239572
109.87	0.0046262
25.7715	0.00585314
32.6627	0.01395
24.2486	0.0582177
70.6648	0.0264309
92.2618	0.0555896
82.1234	0.00107949
159.53	0.0209031
139.095	0.0581919
110.889	0.13154
112.941	0.00143179
135.662	0.0791399
101.877	0.00139469
154.567	0.029541
143.752	0.00337051
77.6533	0.0334534
51.5269	0.0743645
49.1178	0.00468559
33.4331	0.0435496
184.509	0.00611212
112.941	0.00824333
38.8578	0.000525482
38.0791	0.0214058
79.4315	0.0106303
50.722	0.00109417
53.9538	0.000778839
54.7669	0.0015327
43.5597	0.00550747
54.7669	0.0158671
76.769	0.0304155
83.9348	0.00430304
111.913	0.00165231
102.861	0.0243846
118.152	0.000819335
125.651	0.0123579
160.786	0.00502364
133.4	0.00319774
96.0601	0.00360245
176.362	0.00808808
139.095	0.00479729
153.341	0.00137534
140.251	0.019113
106.84	0.000134266
141.412	0.000840325
97.0195	0.000351041
107.846	0.0023644
93.2056	0.00293168
132.277	0.00739394
97.0195	0.0756441
134.528	0.0005375
128.941	0.0239555
148.499	0.00725645
154.567	0.0161839
163.318	0.0072091
146.114	0.000451257
45.9315	0.00210778
108.856	0.00202381
153.341	0.00756622
99.9218	0.000596884
68.0925	0.00229615
149.701	0
149.701	0.00307684
121.336	0.00168104
95.1047	0.0430157
31.1251	0.00822706
109.87	0.000216375
115.011	0.000362748
157.036	0.000181374
160.786	0.00302607
102.861	0.000716768
47.5211	0.0104163
142.579	0.00750874
155.798	0.00181771
29.5913	0.0170514
164.593	0.000924604
122.407	0.0113527
137.945	0.000671167
128.941	0.0494806
117.1	0.000243752
86.6779	0.00341061
51.5269	0.00142639
71.5279	0.0196534
155.798	0
18.9356	0.00910935
73.2629	0.00297865
105.839	0
160.786	0.0128882
71.5279	0.00193844
31.1251	0.00929644
158.28	0.00215023
135.662	9.67735e-05
157.036	0.011504
46.7254	0.00258587
25.0097	0.0120384
107.846	0.00470291
160.786	0.00175959
164.593	0.00534686
150.909	0.00125262
140.251	0.0054128
127.839	0.0154147
57.2191	0.00101977
70.6648	0.000197007
157.036	0.00214877
76.769	0.000425889
70.6648	0.00369815
45.9315	0.00229784
102.861	0.00328737
99.9218	0.0213654
70.6648	0.000176636
104.842	0.0294292
159.53	0.000430673
147.304	0.0417904
84.8457	0.000992758
162.049	0.00379285
159.53	0.00359705
158.28	0.00642102
69.8045	0.00601709
75.0098	7.98113e-05
134.528	0.00407212
135.662	0.00681095
111.913	0.0478175
163.318	0.00629415
48.3186	0.0108469
71.5279	0.00160855
25.7715	0.0221219
147.304	0.000556632
101.877	0.0124849
102.861	0.0130719
49.919	0.0426634
75.8879	0.000859145
159.53	0.000795327
171.065	0.0243032
91.3219	0.00055511
52.3339	0.0159241
31.8934	0
150.909	0.000199279
107.846	0.0105235
132.277	0.00141302
120.27	0.000170768
123.483	0.0238603
147.304	0.00184366
158.28	0.0386362
144.93	0.0157667
140.251	3.74684e-05
139.095	0.0184633
31.1251	0.0280348
167.162	0
137.945	0.00735307
160.786	0.000594655
155.798	0.292559
109.87	0.0183623
62.1852	0.278149
133.4	0.000287102
175.027	0.014234
133.4	0.0606125
116.053	0.154667
87.5994	2.11255e-05
149.701	0.0187932
140.251	0.00824818
35.7507	0.00484697
146.114	0.000256503
148.499	0.0624102
153.341	0.0256009
101.877	0.000429563
74.1348	0.0126395
143.752	0.0130399
80.3255	0.0180807
105.839	0.0823765
105.839	0.020652
159.53	0.0103744
165.874	0.000248942
128.941	0.0136797
137.945	0.000109259
158.28	0
158.28	0.00152803
105.839	5.02602e-05
160.786	0.000980225
146.114	0.00848512
133.4	0.000132118
164.593	2.81697e-05
101.877	0.00263104
157.036	0.000899486
75.0098	5.39795e-05
69.8045	0
122.407	0.00335988
162.049	3.74753e-05
45.1392	2.7741e-05
107.846	4.52651e-05
144.93	0.00111222
104.842	0.000332934
68.0925	0.000232535
103.849	2.34841e-05
75.0098	2.53854e-05
77.6533	0.00143975
143.752	0.00200344
58.041	4.39024e-05
158.28	0.00478983
79.4315	0.000101269
46.7254	7.10803e-05
149.701	0
94.1532	4.78364e-05
147.304	0
76.769	0.0031211
104.842	1.12159e-06
121.336	7.24576e-05
104.842	0.00764448
42.7723	4.87504e-05
154.567	0
124.565	0.00707644
75.0098	5.56069e-05
152.122	0
136.801	0.0100311
149.701	0.0088598
152.122	0.0227526
139.095	0.0901436
168.457	0.0422477
162.049	0.0112956
147.304	0.000741518
149.701	0.00445901
106.84	0.00382563
106.84	0
159.53	0.0336988
172.379	0.0146315
142.579	0.00757956
45.9315	0.0360164
160.786	0.0271125
67.2407	0.000356664
97.9829	0.0503383
111.913	0.000183958
143.752	0.0167423
88.5245	0.0190132
169.758	0.000159842
76.769	0.00759341
172.379	0.000560645
92.2618	0.0337748
136.801	0.0199634
158.28	0.00779639
60.5204	0.013344
133.4	0.0191654
105.839	0.00229686
181.766	0.0158571
111.913	0.0228775
171.065	0.00245844
159.53	0.0180554
168.457	0.000128154
148.499	6.85369e-05
97.0195	0
78.5408	0.0117773
148.499	0.000129331
43.5597	0.000177231
66.3915	4.0628e-05
88.5245	0
58.041	6.09565e-06
150.909	1.90144e-05
48.3186	6.29179e-05
80.3255	0.00218553
41.2022	0
113.974	0.0001127
147.304	1.76331e-06
93.2056	4.61946e-05
72.3939	0
109.87	3.87105e-05
150.909	7.90799e-05
45.9315	0.00208679
134.528	0.00317939
116.053	0.00571506
83.0274	0.000150161
85.76	0
97.9829	0.00658802
175.027	0.000585556
109.87	0
153.341	0
109.87	0.00179492
144.93	9.10448e-05
157.036	0
25.0097	0.00520197
35.7507	0.037808
25.0097	0.00675552
0.761091	0.0355506
15.1514	0.0463306
71.5279	0.00447831
98.9503	0.00714342
94.1532	0.00295202
143.752	0.000128323
115.011	0.000548326
159.53	0.000584805
149.701	0.0200016
135.662	0.0503415
149.701	0.0350226
143.752	0.0284615
67.2407	0.0157017
82.1234	0.0116757
112.941	0.00427258
142.579	0.00523113
130.048	0.000381016
59.6915	0.0180176
71.5279	0.0332125
47.5211	0.0432083
117.1	0.000480791
32.6627	0.000108962
24.2486	0.000148452
22.7282	8.01295e-05
83.0274	5.98082e-05
38.8578	0.00774687
153.341	0.00315076
137.945	0.0099661
140.251	4.46087e-05
133.4	4.75601e-05
155.798	6.21206e-05
81.2228	0.000614938
3.7998	2.09619e-05
12.1267	0
56.3995	1.63151e-05
48.3186	2.92293e-05
113.974	1.94882e-05
162.049	0.000290187
95.1047	0.00293695
142.579	0.000240221
140.251	0.000101932
106.84	0.00122312
108.856	4.34896e-05
119.208	3.937e-05
135.662	9.3577e-05
28.061	0.00139732
20.4514	0.018823
25.7715	0.000243441
79.4315	0.000642105
38.8578	0.000126418
149.701	0.013034
134.528	9.44221e-05
136.801	1.34948e-05
131.16	0.0048188
148.499	0.000426244
82.1234	7.64084e-05
3.7998	2.79777e-05
15.1514	4.28056e-05
58.8651	0.00379938
49.919	0.00010398
115.011	0.00455724
162.049	0.00350195
95.1047	0.0023409
144.93	0.00335255
135.662	0.000135392
102.861	4.32467e-05
105.839	0.000139791
113.974	0.000316887
134.528	8.30448e-05
99.9218	0
91.3219	0.00805064
34.977	0.00149938
68.0925	0
127.839	0.000249169
144.93	4.16548e-05
131.16	0.00133584
149.701	3.1072e-05
152.122	0.00052621
123.483	4.35241e-05
160.786	1.65904e-05
65.5451	4.68563e-05
162.049	0
112.941	7.64663e-05
108.856	0.000272648
22.7282	3.87914e-05
55.5821	0.00504238
64.7013	0
41.2022	0
91.3219	6.77906e-05
141.412	0.0195625
185.891	0.0112574
169.758	0
142.579	0.000165765
93.2056	7.1732e-05
112.941	4.5579e-05
137.945	6.13878e-05
139.095	0.0036444
169.758	0.0115406
50.722	2.47125e-05
165.874	0.00141185
133.4	0.00286583
158.28	0.000152749
43.5597	0.00539018
185.891	0.000447284
180.404	0.000122931
49.1178	0.0313495
179.05	0.00554003
142.579	0.016192
154.567	0.0111375
89.4533	0.0543728
52.3339	0.0312762
32.6627	0.00259153
67.2407	0.0225111
177.702	0.0511605
160.786	0.0189526
183.134	0.0142296
109.87	0.00626922
128.941	0.00160759
159.53	0.045945
171.065	4.89805e-05
157.036	0.0189904
158.28	0.046039
113.974	0.0360183
165.874	0.0641367
127.839	0.143307
154.567	0.00688324
150.909	0.0358376
134.528	0.000794706
102.861	0.0719273
34.2045	0.000132983
49.919	0.037785
46.7254	0.00294054
83.9348	0.000715335
146.114	3.05061e-05
153.341	3.04634e-05
149.701	0.0185324
150.909	0.0434561
150.909	0.0415795
157.036	0.000219886
158.28	8.68549e-05
149.701	0.0395012
173.7	0
108.856	3.60329e-05
134.528	0.00241873
31.8934	0.00872941
104.842	0.00388761
152.122	0.0214618
158.28	0.022385
144.93	2.36954e-05
123.483	0.00990113
146.114	0.00425338
62.1852	0.0529271
97.0195	0.0891167
116.053	0.0031637
131.16	0
158.28	0.00988452
181.766	0.0780436

## Sheet: panel d
Information (bits)
Distr low	Distr high			MEAN	SEM
0.00614687	0.00225184		Distr low	0.0158789	0.00132312
0.00238348	0.00280967		Distr high	0.0130749	0.00118323
0.0174266	0.00857842
0.00350077	0.0083754
0.00351762	0.00590935
0.0154608	0.00937491
0.00361853	0.0103309
0.00189292	0.00904574
0.000729206	0.0100186
0.0123556	0.0109348
0.00172946	0.00513658
0.000686167	0.00525839
0.000996345	0.00129318
0.0192051	0.00447884
0.0014205	0.00369453
0.00246034	0.00451978
0.00249183	0.00470417
0.00125992	0.00233221
0.0111059	0.0052946
0.00341013	0.010058
0.0023689	0.00179953
0.00178767	0.00564518
0.00733681	0.00856513
0.0105811	0.0047032
0.000366529	0.026661
0.00520251	0.00074608
0.00964444	0.000454661
0.0113285	0.00265922
0.00558309	0.00420599
0.00480753	0.00568885
0.00880296	0.000326748
0.00819228	0.00948305
0.0015274	0.000319957
0.0545202	0.00638509
0.00660733	0.00681498
0.0150669	0.00315666
0.0084043	0.00182559
0.00457628	0.0186131
0.00895424	0.001049
0.0129689	0.00138089
0.0415464	0.00166535
0	0.0022455
0.000648025	0.0266826
0.000949823	0.000164495
0.027216	0.000621898
0.0158474	0.00169533
0.000255429	0.0101702
0.00275712	0.00700475
0.00760743	0.00102016
0.0354384	1.57533e-05
0.0023967	5.16846e-05
0.00779337	0.025937
0.0033288	0.00878883
0.0084539	0.0227358
0.000527987	0.000376983
0.0297771	0.00148362
0.0108324	0.0029203
0.00237865	0.00120184
0.0145628	0.00064009
0.00114095	0.000870006
0.000539728	0.000243096
0.0304056	0.0131835
0.0267244	0.000120259
0.00520283	0.000169939
0.0269319	7.02296e-05
0.0356502	0.00107586
0.000520686	0.00966936
0.00064319	0.000248856
0.0130251	0.00538804
0.0175091	0.00136639
0.0161665	0.00226097
0.00794186	0.00857832
0.0108097	0.00841458
0.0137153	0.00108115
0.0363718	0.000251324
0.00765	0.000107196
0.000792064	0.00250319
0.00027167	0.00117735
0.0464572	0.00100231
0.00284374	0
0.0594002	0.0521892
0.0337313	0.00438412
0.00786229	0.020736
0.0567369	0.0106261
0.00237666	0.0113685
0.0302036	0.0201402
0.0271707	0.000198543
0.0176292	0.000376757
0.0130796	0.00199959
0.0744573	0.00119638
0.00726681	0.00387216
0.00270968	0.0163997
0.000517923	0.00530443
0.00249006	0.00899207
0.0413069	0.0109639
0.0926338	0.00229931
0.0226074	0.0599246
0.000285073	0.0140132
0.00942516	0.000235895
0.0204146	0.000608565
0.0159895	0
0.0830326	0.045428
0.00217634	0.00846495
0.0170158	0.000936308
0.000766956	0.0114379
0.000589646	0.0447997
5.42135e-05	0.038867
0.000721883	0.07309
0.0289099	0.0349598
0.000150027	0.0102705
0.000363936	0.00016385
0.0215437	0.0426394
5.24602e-05	0.0205019
0.0298185	0.0301719
0.0762835	0.0135199
0.0392805	0.00578052
0.0424099	0.0292594
0.0579658	0.0443871
0.0237004	0.00581542
0.00986105	0.0124366
0.000102626	0.0414967
0	0.0360397
0.0011934	5.13129e-05
0.0671157	0.00288342
0.000354832	0.00765895
0.0268027	0.00919134
0.101842	0.00902678
0.0664759	0.0136075
0.0413985	0.0460617
0.0281181	0.0364831
0.0271131	0.000631591
0.0120104	0.00227622
0.0790826	0.0483584
0.148664	0.0932369
0.0254822	0.101694
0.0750525	0.0932856
0.0524816	0.0273498
0.00317963	0.0269813
0.0432557	0.000309584
0.0317404	0.0796813
0.111859	0.0449682
0.060744	0.0630852
0.00501228	0.0674509
0.0089337	0.000344186
0.0191457	0.0318291
0.0509453	0.092973
0.0302586	0.109856
0.0522816	0.0283419
0.0732256	0.00035703
0.103839	0.093166
0.108179	0.0152185
0.0498522	3.5652e-06
0.00581802	0.0439473
0.0053692	0.0146024
0.000100058	0.00907944
0.00159355	7.68605e-05
0.000124605	0.00711668
0.00499095	0.00647828
0.00211552	0.00672869
0.00477276	0.000322166
0.00397006	0.000297941
0.000324682	0.00299655
1.61694e-05	0.00277047
0.0165518	0
0.0027961	0.0228385
0.00037703	0.0166525
0.000142928	0.00079742
0.000146348	0.000256456
0.00412628	0.0113896
0.00276206	0.0110038
0.00153395	0.000157743
0.0215633	0.00268567
0.00925983	6.73612e-05
0.000315603	0.000228162
0.00207065	0.000515738
0.013978	0.00457812
0.0337636	0.0021246
0.000922614	0.00172211
0.0312849	0.0100917
0.0165825	0.00618287
0.0123746	0.00067532
0.0715148	0.000125518
0.00177763	0.000431898
0.0082935	0.000186968
0.000592544	0.000775655
0.0243167	0.0168681
0.0193767	0.00545204
0.0492098	0.00376409
0.00546117	0.0429477
0.039289	0.0186221
0.00680273	0.00828958
0.00184027	0.00378295
0.0765132	0.0150106
0.00454229	0.000592544
0.00211938	0.00571352
0.00363905	0.0312829
0.00178684	0.00441257
0.00906704	0.0160769
0.0372961	0.0298548
0.0806586	0.00995944
0.085629	0.00186144
0.00593611	0.0168291
0.0046262	0.0427101
0.00585314	0.0128013
0.01395	0.0239572
0.0582177	0.0209031
0.0264309	0.0581919
0.0555896	0.0791399
0.00107949	0.029541
0.13154	0.00337051
0.00143179	0.00611212
0.00139469	0.0123579
0.0334534	0.00502364
0.0743645	0.00319774
0.00468559	0.00808808
0.0435496	0.00479729
0.00824333	0.00137534
0.000525482	0.019113
0.0214058	0.000840325
0.0106303	0.00739394
0.00109417	0.0005375
0.000778839	0.0239555
0.0015327	0.00725645
0.00550747	0.0161839
0.0158671	0.0072091
0.0304155	0.000451257
0.00430304	0.00756622
0.00165231	0
0.0243846	0.00307684
0.000819335	0.00168104
0.00360245	0.000181374
0.000134266	0.00302607
0.000351041	0.00750874
0.0023644	0.00181771
0.00293168	0.000924604
0.0756441	0.0113527
0.00210778	0.000671167
0.00202381	0.0494806
0.000596884	0
0.00229615	0.0128882
0.0430157	0.00215023
0.00822706	9.67735e-05
0.000216375	0.011504
0.000362748	0.00175959
0.000716768	0.00534686
0.0104163	0.00125262
0.0170514	0.0054128
0.000243752	0.0154147
0.00341061	0.00214877
0.00142639	0.000430673
0.0196534	0.0417904
0.00910935	0.00379285
0.00297865	0.00359705
0	0.00642102
0.00193844	0.00407212
0.00929644	0.00681095
0.00258587	0.00629415
0.0120384	0.000556632
0.00470291	0.000795327
0.00101977	0.0243032
0.000197007	0.000199279
0.000425889	0.00141302
0.00369815	0.000170768
0.00229784	0.0238603
0.00328737	0.00184366
0.0213654	0.0386362
0.000176636	0.0157667
0.0294292	3.74684e-05
0.000992758	0.0184633
0.00601709	0
7.98113e-05	0.00735307
0.0478175	0.000594655
0.0108469	0.292559
0.00160855	0.000287102
0.0221219	0.014234
0.0124849	0.0606125
0.0130719	0.0187932
0.0426634	0.00824818
0.000859145	0.000256503
0.00055511	0.0624102
0.0159241	0.0256009
0	0.0130399
0.0105235	0.0103744
0.0280348	0.000248942
0.0183623	0.0136797
0.278149	0.000109259
0.154667	0
2.11255e-05	0.00152803
0.00484697	0.000980225
0.000429563	0.00848512
0.0126395	0.000132118
0.0180807	2.81697e-05
0.0823765	0.000899486
0.020652	0.00335988
5.02602e-05	3.74753e-05
0.00263104	0.00111222
5.39795e-05	0.00200344
0	0.00478983
2.7741e-05	0
4.52651e-05	0
0.000332934	7.24576e-05
0.000232535	0
2.34841e-05	0.00707644
2.53854e-05	0
0.00143975	0.0100311
4.39024e-05	0.0088598
0.000101269	0.0227526
7.10803e-05	0.0901436
4.78364e-05	0.0422477
0.0031211	0.0112956
1.12159e-06	0.000741518
0.00764448	0.00445901
4.87504e-05	0.0336988
5.56069e-05	0.0146315
0.00382563	0.00757956
0	0.0271125
0.0360164	0.0167423
0.000356664	0.000159842
0.0503383	0.000560645
0.000183958	0.0199634
0.0190132	0.00779639
0.00759341	0.0191654
0.0337748	0.0158571
0.013344	0.00245844
0.00229686	0.0180554
0.0228775	0.000128154
0	6.85369e-05
0.0117773	0.000129331
0.000177231	1.90144e-05
4.0628e-05	1.76331e-06
0	7.90799e-05
6.09565e-06	0.00317939
6.29179e-05	0.000585556
0.00218553	0
0	9.10448e-05
0.0001127	0
4.61946e-05	0.000128323
0	0.000584805
3.87105e-05	0.0200016
0.00208679	0.0503415
0.00571506	0.0350226
0.000150161	0.0284615
0	0.00523113
0.00658802	0.000381016
0	0.00315076
0.00179492	0.0099661
0.00520197	4.46087e-05
0.037808	4.75601e-05
0.00675552	6.21206e-05
0.0355506	0.000290187
0.0463306	0.000240221
0.00447831	0.000101932
0.00714342	3.937e-05
0.00295202	9.3577e-05
0.000548326	0.013034
0.0157017	9.44221e-05
0.0116757	1.34948e-05
0.00427258	0.0048188
0.0180176	0.000426244
0.0332125	0.00350195
0.0432083	0.00335255
0.000480791	0.000135392
0.000108962	8.30448e-05
0.000148452	0.000249169
8.01295e-05	4.16548e-05
5.98082e-05	0.00133584
0.00774687	3.1072e-05
0.000614938	0.00052621
2.09619e-05	4.35241e-05
0	1.65904e-05
1.63151e-05	0
2.92293e-05	0.0195625
1.94882e-05	0.0112574
0.00293695	0
0.00122312	0.000165765
4.34896e-05	6.13878e-05
0.00139732	0.0036444
0.018823	0.0115406
0.000243441	0.00141185
0.000642105	0.00286583
0.000126418	0.000152749
7.64084e-05	0.000447284
2.79777e-05	0.000122931
4.28056e-05	0.00554003
0.00379938	0.016192
0.00010398	0.0111375
0.00455724	0.0511605
0.0023409	0.0189526
4.32467e-05	0.0142296
0.000139791	0.00160759
0.000316887	0.045945
0	4.89805e-05
0.00805064	0.0189904
0.00149938	0.046039
0	0.0641367
4.68563e-05	0.143307
7.64663e-05	0.00688324
0.000272648	0.0358376
3.87914e-05	0.000794706
0.00504238	3.05061e-05
0	3.04634e-05
0	0.0185324
6.77906e-05	0.0434561
7.1732e-05	0.0415795
4.5579e-05	0.000219886
2.47125e-05	8.68549e-05
0.00539018	0.0395012
0.0313495	0
0.0543728	0.00241873
0.0312762	0.0214618
0.00259153	0.022385
0.0225111	2.36954e-05
0.00626922	0.00990113
0.0360183	0.00425338
0.0719273	0
0.000132983	0.00988452
0.037785	0.0780436
0.00294054
0.000715335
3.60329e-05
0.00872941
0.00388761
0.0529271
0.0891167
0.0031637

## Sheet: panel e
Max distance from center (% radius) (x)	Information (bits) (y)																									Max distance from center (% radius) (x)	Information (bits) (y)
	Time series 1	Time series 2	Time series 3	Time series 4	Time series 5	Time series 6	Time series 7	Time series 8	Time series 9	Time series 10	Time series 11	Time series 12	Time series 13	Time series 14	Time series 15	Time series 16	Time series 17	Time series 18	Time series 19	Time series 20	Time series 21	Time series 22	Time series 23	Time series 24			MEAN	SEM
25	0.503878	0.149535	0.118512	NaN	0.327934	0.232682	0.0346565	0.352017	0.193759	0.275367	0.364585	0.21942	0.0388164	NaN	NaN	NaN	NaN	0.297365	0.107238	0.123713	0.156612	0.00210774	0.0688649	0.0747655		25	0.191675	0.0274321
50	0.552109	0.360992	0.232949	0.191487	0.415547	0.387899	0.188245	0.500097	0.552632	0.522696	0.444158	0.542134	0.377222	0.0326801	0.0732498	0.309158	0.106955	0.447563	0.110836	0.173723	0.167825	0.0942661	0.289479	0.166517		50	0.301684	0.0347697
75	0.564044	0.378953	0.278813	0.267161	0.418383	0.360193	0.245845	0.64553	0.681474	0.681942	0.531892	0.583189	0.3854	0.087728	0.0906647	0.376608	0.138528	0.439344	0.157773	0.202414	0.235031	0.118145	0.395918	0.194159		75	0.352464	0.0383475
100	0.5689	0.435472	0.280278	0.343935	0.430479	0.386591	0.262219	0.648988	0.713291	0.692567	0.542272	0.609645	0.423256	0.10295	0.103116	0.434981	0.151245	0.440359	0.204087	0.186906	0.230456	0.157066	0.415748	0.212625		100	0.37406	0.0382995

## Sheet: panel f
SNR (x)	Information (bits) (y)		Linear regression fit of data (x)	Linear regression fit of data (y)
6.41653	0.00614687		0.415258	0.0179896
7.70251	0.00238348		0.517751	0.0179865
7.11458	0.0174266		0.569013	0.0179849
6.80501	0.00350077		0.602513	0.0179839
3.62571	0.00225184		0.718159	0.0179803
5.65502	0.00280967		0.769809	0.0179788
3.35201	0.00857842		0.809053	0.0179776
2.25248	0.0083754		0.812059	0.0179775
3.463	0.00590935		0.81359	0.0179774
2.45341	0.00937491		0.816596	0.0179773
1.50826	0.0103309		0.949032	0.0179733
1.37115	0.00904574		0.950693	0.0179732
4.3213	0.00351762		0.962504	0.0179728
1.93023	0.0100186		0.963539	0.0179728
3.85635	0.0154608		1.00289	0.0179716
1.77648	0.0109348		1.03885	0.0179705
7.34217	0.00361853		1.06195	0.0179698
2.4161	0.00513658		1.07678	0.0179693
1.03885	0.00525839		1.08481	0.0179691
4.96792	0.00189292		1.09109	0.0179689
4.09109	0.000729206		1.10572	0.0179684
5.04703	0.0123556		1.10598	0.0179684
2.62331	0.00129318		1.12078	0.017968
4.64512	0.00172946		1.14263	0.0179673
4.40468	0.000686167		1.15178	0.017967
1.45023	0.000996345		1.15221	0.017967
0.950693	0.0192051		1.16359	0.0179667
1.60996	0.0014205		1.17432	0.0179663
4.15887	0.00246034		1.17446	0.0179663
3.10227	0.00447884		1.18608	0.017966
3.56157	0.00249183		1.19129	0.0179658
4.94335	0.00125992		1.19428	0.0179657
2.17132	0.00369453		1.20769	0.0179653
3.94909	0.0111059		1.26325	0.0179636
4.33331	0.00341013		1.27321	0.0179633
1.72336	0.00451978		1.2921	0.0179627
4.77834	0.0023689		1.32208	0.0179618
0.949032	0.00470417		1.33102	0.0179615
4.19978	0.00178767		1.33646	0.0179614
3.54546	0.00733681		1.34283	0.0179612
2.35974	0.00233221		1.37115	0.0179603
1.75509	0.0052946		1.39167	0.0179597
0.963539	0.010058		1.40454	0.0179593
4.42968	0.0105811		1.442	0.0179581
4.74166	0.00179953		1.45023	0.0179579
3.75317	0.000366529		1.45225	0.0179578
1.18608	0.00564518		1.48803	0.0179567
1.10572	0.00856513		1.50611	0.0179561
3.79474	0.00520251		1.50826	0.0179561
3.53961	0.00964444		1.51031	0.017956
2.04992	0.0113285		1.51783	0.0179558
2.14377	0.0047032		1.51884	0.0179558
4.64003	0.026661		1.52228	0.0179556
1.59982	0.00074608		1.52275	0.0179556
4.4693	0.000454661		1.54774	0.0179549
1.32208	0.00265922		1.5759	0.017954
3.25905	0.00558309		1.59636	0.0179534
2.05221	0.00480753		1.59982	0.0179533
1.33102	0.00420599		1.60996	0.017953
3.4414	0.00880296		1.61529	0.0179528
1.93014	0.00568885		1.62128	0.0179526
3.61208	0.000326748		1.62348	0.0179525
4.23997	0.00819228		1.64156	0.017952
3.73933	0.00948305		1.66072	0.0179514
2.22745	0.000319957		1.66182	0.0179514
2.94724	0.00638509		1.66443	0.0179513
4.49264	0.00681498		1.66621	0.0179512
3.61333	0.00315666		1.66889	0.0179511
1.66072	0.00182559		1.66982	0.0179511
4.53562	0.0186131		1.69798	0.0179502
3.09376	0.001049		1.69814	0.0179502
3.31575	0.0015274		1.70902	0.0179499
3.7425	0.0545202		1.71063	0.0179499
1.85657	0.00138089		1.72336	0.0179495
2.58996	0.00660733		1.72413	0.0179494
3.47318	0.0150669		1.73562	0.0179491
1.87267	0.0084043		1.74984	0.0179487
1.66982	0.00166535		1.75509	0.0179485
4.16127	0.00457628		1.76018	0.0179483
3.6161	0.00895424		1.76414	0.0179482
3.3257	0.0022455		1.77648	0.0179478
4.19627	0.0266826		1.80509	0.017947
2.05705	0.000164495		1.8073	0.0179469
2.3243	0.000621898		1.80974	0.0179468
2.5991	0.00169533		1.81129	0.0179468
1.5759	0.0101702		1.82558	0.0179463
1.92907	0.00700475		1.83842	0.0179459
1.59636	0.00102016		1.85657	0.0179454
2.88495	0.0129689		1.86329	0.0179452
1.27321	1.57533e-05		1.87267	0.0179449
3.46677	0.0415464		1.8743	0.0179448
1.15221	0		1.88893	0.0179444
2.24957	5.16846e-05		1.88964	0.0179444
3.45844	0.000648025		1.89314	0.0179443
3.77368	0.025937		1.90858	0.0179438
2.52462	0.00878883		1.91128	0.0179437
6.41247	0.0227358		1.91598	0.0179436
2.72178	0.000949823		1.92079	0.0179434
6.864	0.000376983		1.92907	0.0179432
3.85547	0.027216		1.93014	0.0179431
2.75889	0.0158474		1.93023	0.0179431
2.6172	0.000255429		1.93385	0.017943
2.69108	0.00148362		1.9513	0.0179425
3.66432	0.00275712		1.95316	0.0179424
3.82221	0.00760743		1.96152	0.0179422
5.07516	0.0354384		1.99983	0.017941
2.38847	0.0029203		2.01518	0.0179405
1.45225	0.00120184		2.01556	0.0179405
2.05499	0.00064009		2.03999	0.0179397
2.55149	0.000870006		2.04992	0.0179394
2.01556	0.000243096		2.05221	0.0179394
1.50611	0.0131835		2.05499	0.0179393
2.5579	0.0023967		2.05705	0.0179392
2.36778	0.00779337		2.05705	0.0179392
3.05807	0.0033288		2.06109	0.0179391
2.40772	0.0084539		2.07248	0.0179387
2.67595	0.000527987		2.09179	0.0179382
2.63173	0.000120259		2.13145	0.0179369
3.48061	0.0297771		2.14377	0.0179366
2.07248	0.0108324		2.15858	0.0179361
2.80935	0.00237865		2.17132	0.0179357
1.95316	0.000169939		2.19242	0.0179351
2.78261	7.02296e-05		2.19296	0.017935
2.19296	0.0145628		2.19348	0.017935
4.37458	0.00114095		2.2	0.0179348
2.38824	0.00107586		2.21537	0.0179344
1.64156	0.00966936		2.21617	0.0179343
1.72413	0.000539728		2.22306	0.0179341
0.569013	0.0304056		2.22745	0.017934
2.99709	0.0267244		2.22813	0.017934
2.21617	0.00520283		2.23019	0.0179339
3.06295	0.0269319		2.23132	0.0179339
3.04432	0.0356502		2.24161	0.0179336
2.7381	0.000520686		2.24929	0.0179333
1.70902	0.00064319		2.24957	0.0179333
1.62348	0.000248856		2.25011	0.0179333
2.69783	0.0130251		2.25248	0.0179332
2.91217	0.0175091		2.27752	0.0179324
1.91598	0.00538804		2.28648	0.0179322
1.80974	0.0161665		2.30789	0.0179315
1.91128	0.00794186		2.324	0.017931
0.81359	0.00136639		2.3243	0.017931
0.769809	0.00226097		2.32635	0.0179309
1.17446	0.00857832		2.34335	0.0179304
0.517751	0.00841458		2.35974	0.0179299
0.718159	0.00108115		2.36731	0.0179297
0.602513	0.000251324		2.36778	0.0179297
7.43282	0.000107196		2.37077	0.0179296
5.30851	0.0108097		2.37653	0.0179294
5.12438	0.00250319		2.38292	0.0179292
4.01652	0.0137153		2.38824	0.017929
4.26667	0.00117735		2.38847	0.017929
4.77492	0.0363718		2.39301	0.0179289
3.40728	0.00100231		2.39311	0.0179289
2.13145	0		2.39553	0.0179288
3.6809	0.0521892		2.39979	0.0179287
1.82558	0.00765		2.40772	0.0179284
1.19129	0.00438412		2.4161	0.0179282
2.5796	0.020736		2.44911	0.0179272
2.66607	0.000792064		2.44946	0.0179272
2.22306	0.0106261		2.45341	0.017927
1.71063	0.0113685		2.46843	0.0179266
2.23019	0.00027167		2.48575	0.0179261
3.90755	0.0201402		2.50646	0.0179254
2.9145	0.000198543		2.50803	0.0179254
5.76038	0.0464572		2.51114	0.0179253
2.37653	0.000376757		2.51501	0.0179252
1.52228	0.00199959		2.52462	0.0179249
1.90858	0.00284374		2.52471	0.0179249
1.19428	0.00119638		2.53036	0.0179247
3.78641	0.0594002		2.53254	0.0179246
2.09179	0.00387216		2.54366	0.0179243
3.99964	0.0337313		2.55149	0.017924
2.30789	0.00786229		2.55186	0.017924
1.92079	0.0163997		2.5579	0.0179238
1.33646	0.00530443		2.56672	0.0179236
1.96152	0.00899207		2.57076	0.0179234
2.88109	0.0109639		2.57666	0.0179233
3.66395	0.0567369		2.57858	0.0179232
1.74984	0.00237666		2.5796	0.0179232
1.16359	0.00229931		2.58996	0.0179229
2.95458	0.0599246		2.5991	0.0179226
3.01795	0.0302036		2.59973	0.0179226
3.10336	0.0271707		2.6172	0.017922
0.415258	0.0176292		2.61827	0.017922
1.8073	0.0130796		2.62331	0.0179218
38.7178	0.0140132		2.62382	0.0179218
17.4175	0.000235895		2.62546	0.0179218
15.0683	0.000608565		2.63173	0.0179216
12.4189	0.0744573		2.65326	0.0179209
12.82	0.00726681		2.66607	0.0179205
8.13524	0.00270968		2.66613	0.0179205
8.84375	0.000517923		2.66707	0.0179205
7.13615	0		2.67595	0.0179202
12.0705	0.00249006		2.68656	0.0179199
10.649	0.045428		2.69108	0.0179197
3.57216	0.00846495		2.69117	0.0179197
17.2943	0.000936308		2.69241	0.0179197
7.30487	0.0114379		2.69281	0.0179197
8.77766	0.0447997		2.69449	0.0179196
8.17933	0.038867		2.69469	0.0179196
6.24245	0.07309		2.69783	0.0179195
9.50102	0.0413069		2.71439	0.017919
8.62206	0.0926338		2.72178	0.0179188
6.50841	0.0226074		2.72987	0.0179186
6.31383	0.0349598		2.7381	0.0179183
8.70201	0.000285073		2.7389	0.0179183
7.70493	0.0102705		2.75518	0.0179178
9.38626	0.00942516		2.75889	0.0179177
4.5877	0.00016385		2.76348	0.0179175
6.97624	0.0426394		2.77011	0.0179173
7.43737	0.0204146		2.78261	0.0179169
11.4627	0.0159895		2.80935	0.0179161
6.25334	0.0830326		2.81971	0.0179158
7.52242	0.0205019		2.8237	0.0179157
8.32137	0.0301719		2.84244	0.0179151
5.3133	0.0135199		2.85536	0.0179147
5.87805	0.00217634		2.85952	0.0179146
6.01738	0.0170158		2.86053	0.0179145
5.22383	0.000766956		2.87323	0.0179142
4.94705	0.000589646		2.8767	0.017914
4.13391	5.42135e-05		2.88109	0.0179139
5.84176	0.000721883		2.88495	0.0179138
1.20769	0.00578052		2.89284	0.0179135
8.93633	0.0289099		2.91217	0.017913
3.3986	0.0292594		2.9145	0.0179129
6.5322	0.000150027		2.93175	0.0179124
3.53445	0.000363936		2.94688	0.0179119
5.95524	0.0215437		2.94724	0.0179119
5.71251	0.0443871		2.94896	0.0179118
7.55059	0.00581542		2.95458	0.0179117
3.82203	5.24602e-05		2.95846	0.0179115
5.16441	0.0298185		2.95882	0.0179115
5.3351	0.0762835		2.97244	0.0179111
1.00289	0.0124366		2.97278	0.0179111
5.44387	0.0392805		2.98676	0.0179107
4.46849	0.0424099		2.99709	0.0179103
3.57124	0.0414967		3.01682	0.0179097
5.12624	0.0579658		3.01795	0.0179097
2.51114	0.0360397		3.02954	0.0179094
4.67889	0.0237004		3.0297	0.0179093
3.15393	0.00986105		3.03476	0.0179092
1.14263	5.13129e-05		3.04432	0.0179089
1.69798	0.000102626		3.0548	0.0179086
1.89314	0.00288342		3.05807	0.0179085
0.809053	0		3.06295	0.0179083
12.6458	0.00765895		3.08448	0.0179077
6.44872	0.00919134		3.09358	0.0179074
12.9663	0.00902678		3.09376	0.0179074
10.8938	0.0011934		3.0943	0.0179074
14.8634	0.0671157		3.10227	0.0179071
8.94223	0.000354832		3.10336	0.0179071
4.25884	0.0268027		3.10466	0.017907
4.43291	0.0136075		3.14734	0.0179057
5.86602	0.0460617		3.15062	0.0179056
4.46345	0.0364831		3.15393	0.0179055
4.16345	0.000631591		3.15879	0.0179054
14.0967	0.00227622		3.15891	0.0179054
4.15315	0.0483584		3.17539	0.0179049
5.14597	0.0932369		3.17855	0.0179048
6.09473	0.101694		3.18198	0.0179047
4.32486	0.0932856		3.20771	0.0179039
6.71657	0.101842		3.21934	0.0179035
5.46744	0.0664759		3.22306	0.0179034
11.5607	0.0413985		3.22785	0.0179033
8.64162	0.0273498		3.23456	0.0179031
8.18423	0.0281181		3.24461	0.0179027
6.75684	0.0269813		3.25098	0.0179025
14.4937	0.0271131		3.25905	0.0179023
2.36731	0.000309584		3.26197	0.0179022
6.07153	0.0796813		3.26943	0.017902
7.38581	0.0120104		3.28785	0.0179014
6.82672	0.0790826		3.31575	0.0179006
8.96604	0.148664		3.3257	0.0179003
6.02664	0.0449682		3.33305	0.0179
5.38965	0.0630852		3.34245	0.0178997
12.7198	0.0674509		3.35201	0.0178994
8.65453	0.0254822		3.38744	0.0178984
8.86075	0.0750525		3.39269	0.0178982
7.20733	0.0524816		3.3986	0.017898
2.51501	0.00317963		3.40728	0.0178977
5.54728	0.0432557		3.41003	0.0178977
5.43656	0.0317404		3.41302	0.0178976
2.93175	0.000344186		3.41786	0.0178974
6.59986	0.111859		3.42076	0.0178973
5.733	0.0318291		3.43003	0.0178971
7.01309	0.060744		3.4414	0.0178967
4.47327	0.00501228		3.45709	0.0178962
4.72634	0.0089337		3.45844	0.0178962
7.48902	0.092973		3.463	0.017896
7.92884	0.109856		3.46677	0.0178959
5.3331	0.0191457		3.47318	0.0178957
7.43901	0.0509453		3.47434	0.0178957
7.02779	0.0302586		3.47575	0.0178956
4.93432	0.0283419		3.48061	0.0178955
7.45205	0.0522816		3.49099	0.0178952
5.29468	0.0732256		3.49333	0.0178951
6.03016	0.00035703		3.49693	0.017895
5.58583	0.103839		3.49768	0.017895
8.76127	0.093166		3.51617	0.0178944
6.00866	0.108179		3.51918	0.0178943
9.05703	0.0498522		3.53445	0.0178938
5.42027	0.0152185		3.53961	0.0178937
4.13489	0.00581802		3.54106	0.0178936
1.34283	3.5652e-06		3.54146	0.0178936
1.2921	0.0053692		3.54364	0.0178936
6.14873	0.0439473		3.54546	0.0178935
3.69462	0.000100058		3.55035	0.0178934
4.00869	0.00159355		3.55723	0.0178931
6.69993	0.0146024		3.56111	0.017893
30.2531	0.00907944		3.56157	0.017893
11.3648	7.68605e-05		3.57124	0.0178927
6.2909	0.00711668		3.57216	0.0178927
4.81926	0.00647828		3.58012	0.0178924
6.33099	0.00672869		3.6084	0.0178916
6.34574	0.000124605		3.61208	0.0178915
7.65221	0.000322166		3.61333	0.0178914
1.12078	0.000297941		3.6161	0.0178913
5.57072	0.00299655		3.62571	0.017891
4.44947	0.00499095		3.64513	0.0178904
5.12991	0.00277047		3.65323	0.0178902
10.145	0		3.65831	0.01789
4.59332	0.0228385		3.66395	0.0178899
4.81741	0.0166525		3.66432	0.0178899
2.24929	0.00079742		3.67241	0.0178896
2.54366	0.000256456		3.67497	0.0178895
4.63484	0.0113896		3.67524	0.0178895
4.84509	0.0110038		3.67532	0.0178895
1.08481	0.00211552		3.67565	0.0178895
1.8743	0.00477276		3.6809	0.0178893
17.7615	0.000157743		3.69462	0.0178889
1.83842	0.00397006		3.71535	0.0178883
13.4328	0.000324682		3.72061	0.0178881
0.962504	0.00268567		3.73317	0.0178877
3.49333	1.61694e-05		3.73933	0.0178876
8.76388	0.0165518		3.73967	0.0178875
8.95572	0.0027961		3.7425	0.0178875
4.08291	0.00037703		3.74763	0.0178873
9.33763	0.000142928		3.75317	0.0178871
6.9726	0.000146348		3.75582	0.017887
0.812059	6.73612e-05		3.77368	0.0178865
3.20771	0.000228162		3.78017	0.0178863
7.65949	0.00412628		3.78641	0.0178861
3.38744	0.00276206		3.79474	0.0178858
1.76018	0.000515738		3.80166	0.0178856
27.7673	0.00153395		3.80876	0.0178854
11.8953	0.0215633		3.81918	0.0178851
5.97531	0.00457812		3.82203	0.017885
9.11927	0.0021246		3.82221	0.017885
8.79224	0.00172211		3.82415	0.0178849
6.86515	0.0100917		3.82521	0.0178849
4.85782	0.00618287		3.83344	0.0178847
1.15178	0.00067532		3.85547	0.017884
3.22306	0.000125518		3.85635	0.017884
6.30494	0.00925983		3.85655	0.017884
3.08448	0.000315603		3.86359	0.0178837
7.77511	0.000431898		3.89077	0.0178829
4.189	0.000186968		3.8952	0.0178828
3.56111	0.000775655		3.89521	0.0178828
1.81129	0.00207065		3.90006	0.0178826
4.38008	0.013978		3.90108	0.0178826
5.10724	0.0168681		3.90687	0.0178824
13.0188	0.00545204		3.90755	0.0178824
17.0629	0.00376409		3.90808	0.0178824
2.59973	0.0337636		3.91819	0.0178821
2.85536	0.000922614		3.91892	0.017882
3.89521	0.0312849		3.92346	0.0178819
7.92823	0.0429477		3.93847	0.0178814
4.51656	0.0165825		3.94444	0.0178813
7.62688	0.0123746		3.94909	0.0178811
4.30389	0.0715148		3.9576	0.0178808
5.72638	0.00177763		3.9824	0.0178801
2.86053	0.0082935		3.99964	0.0178796
1.88893	0.000592544		4.00727	0.0178793
5.63993	0.0243167		4.00869	0.0178793
8.81117	0.0193767		4.00894	0.0178793
6.33814	0.0492098		4.01652	0.017879
7.63347	0.00546117		4.01992	0.0178789
6.15177	0.039289		4.02538	0.0178788
3.9824	0.00680273		4.02737	0.0178787
3.82415	0.0186221		4.0445	0.0178782
3.24461	0.00828958		4.05101	0.017878
3.17855	0.00378295		4.05451	0.0178779
2.77011	0.00184027		4.05631	0.0178778
3.18198	0.0150106		4.05664	0.0178778
1.51031	0.0765132		4.06134	0.0178777
1.66889	0.000592544		4.06341	0.0178776
1.52275	0.00571352		4.07756	0.0178772
2.62382	0.00454229		4.08291	0.017877
2.69469	0.00211938		4.09109	0.0178767
3.49693	0.00363905		4.09716	0.0178766
4.02538	0.00178684		4.12229	0.0178758
4.45283	0.00906704		4.13391	0.0178754
7.2636	0.0312829		4.13489	0.0178754
1.48803	0.00441257		4.13491	0.0178754
2.01518	0.0160769		4.14382	0.0178751
1.9513	0.0372961		4.15315	0.0178748
1.17432	0.0298548		4.15526	0.0178748
2.06109	0.0806586		4.15887	0.0178747
5.37797	0.00995944		4.16054	0.0178746
6.23554	0.00186144		4.16127	0.0178746
8.00717	0.0168291		4.16323	0.0178745
12.0828	0.0427101		4.16345	0.0178745
3.67565	0.0128013		4.16631	0.0178744
6.36059	0.085629		4.189	0.0178737
3.58012	0.00593611		4.19215	0.0178736
8.33419	0.0239572		4.19318	0.0178736
4.05664	0.0046262		4.19627	0.0178735
3.41786	0.00585314		4.19978	0.0178734
2.87323	0.01395		4.2058	0.0178732
4.71261	0.0582177		4.23216	0.0178724
4.09716	0.0264309		4.23592	0.0178723
10.8274	0.0555896		4.23997	0.0178722
8.23762	0.00107949		4.25884	0.0178716
4.85752	0.0209031		4.25905	0.0178716
2.72987	0.0581919		4.2628	0.0178715
3.74763	0.13154		4.26667	0.0178714
3.89077	0.00143179		4.29304	0.0178705
6.2485	0.0791399		4.29478	0.0178705
1.66182	0.00139469		4.29732	0.0178704
7.13078	0.029541		4.29822	0.0178704
4.15526	0.00337051		4.29827	0.0178704
2.46843	0.0334534		4.30389	0.0178702
3.41003	0.0743645		4.30933	0.01787
4.02737	0.00468559		4.31383	0.0178699
3.85655	0.0435496		4.3213	0.0178697
5.29928	0.00611212		4.32486	0.0178696
3.67524	0.00824333		4.33331	0.0178693
5.91341	0.000525482		4.35164	0.0178687
6.77725	0.0214058		4.35561	0.0178686
7.35423	0.0106303		4.36056	0.0178685
4.29732	0.00109417		4.36079	0.0178685
2.95846	0.000778839		4.37458	0.017868
10.9567	0.0015327		4.37642	0.017868
8.21843	0.00550747		4.38008	0.0178679
2.97278	0.0158671		4.40468	0.0178671
3.91892	0.0304155		4.4099	0.017867
9.64818	0.00430304		4.42968	0.0178663
9.29551	0.00165231		4.43291	0.0178662
4.78326	0.0243846		4.4391	0.0178661
2.84244	0.000819335		4.44381	0.0178659
7.79766	0.0123579		4.44947	0.0178657
2.81971	0.00502364		4.45283	0.0178656
3.10466	0.00319774		4.45482	0.0178656
4.8283	0.00360245		4.46345	0.0178653
4.81647	0.00808808		4.46849	0.0178652
3.65323	0.00479729		4.4693	0.0178651
8.83588	0.00137534		4.47005	0.0178651
4.51027	0.019113		4.47327	0.017865
2.69281	0.000134266		4.47489	0.017865
4.36056	0.000840325		4.48895	0.0178645
2.76348	0.000351041		4.49104	0.0178645
2.39553	0.0023644		4.49264	0.0178644
1.69814	0.00293168		4.50412	0.0178641
2.24161	0.00739394		4.50572	0.017864
4.14382	0.0756441		4.51027	0.0178639
19.0466	0.0005375		4.51063	0.0178639
12.1193	0.0239555		4.51656	0.0178637
7.00936	0.00725645		4.51663	0.0178637
5.45665	0.0161839		4.52406	0.0178634
5.24978	0.0072091		4.53562	0.0178631
7.18565	0.000451257		4.58464	0.0178616
5.96295	0.00210778		4.5877	0.0178615
5.91067	0.00202381		4.59332	0.0178613
6.26955	0.00756622		4.59372	0.0178613
5.50943	0.000596884		4.60758	0.0178609
5.38012	0.00229615		4.63484	0.01786
5.10889	0		4.64003	0.0178599
5.56625	0.00307684		4.64512	0.0178597
3.67497	0.00168104		4.65925	0.0178593
5.27837	0.0430157		4.67889	0.0178587
6.91356	0.00822706		4.71261	0.0178577
5.75057	0.000216375		4.71702	0.0178575
4.47489	0.000362748		4.72634	0.0178572
4.2628	0.000181374		4.74166	0.0178568
4.91444	0.00302607		4.7635	0.0178561
4.58464	0.000716768		4.77492	0.0178557
3.91819	0.0104163		4.77834	0.0178556
3.8952	0.00750874		4.78326	0.0178555
3.6084	0.00181771		4.79861	0.017855
4.49104	0.0170514		4.80075	0.017855
2.48575	0.000924604		4.81647	0.0178545
3.55723	0.0113527		4.81741	0.0178544
3.01682	0.000671167		4.81926	0.0178544
3.80166	0.0494806		4.82459	0.0178542
2.44911	0.000243752		4.8256	0.0178542
3.21934	0.00341061		4.8283	0.0178541
2.39311	0.00142639		4.83019	0.017854
3.02954	0.0196534		4.84034	0.0178537
2.94896	0		4.84509	0.0178536
2.75518	0.00910935		4.85752	0.0178532
2.62546	0.00297865		4.85782	0.0178532
2.50803	0		4.85817	0.0178532
2.52471	0.0128882		4.87634	0.0178526
2.53036	0.00193844		4.88104	0.0178525
2.38292	0.00929644		4.88948	0.0178522
2.32635	0.00215023		4.89589	0.017852
22.025	9.67735e-05		4.91444	0.0178515
8.74317	0.011504		4.93432	0.0178508
3.83344	0.00258587		4.94335	0.0178506
7.79728	0.0120384		4.94705	0.0178505
4.98073	0.00470291		4.96514	0.0178499
4.4099	0.00175959		4.96792	0.0178498
4.84034	0.00534686		4.97456	0.0178496
7.83748	0.00125262		4.98073	0.0178494
5.60587	0.0054128		4.98847	0.0178492
8.64582	0.0154147		4.99916	0.0178489
2.85952	0.00101977		5.0391	0.0178476
4.50572	0.000197007		5.04703	0.0178474
6.06069	0.00214877		5.05866	0.017847
6.15506	0.000425889		5.07516	0.0178465
4.52406	0.00369815		5.10484	0.0178456
4.30933	0.00229784		5.10724	0.0178455
4.35164	0.00328737		5.10889	0.0178455
5.05866	0.0213654		5.12438	0.017845
5.6723	0.000176636		5.12624	0.017845
4.99916	0.0294292		5.12991	0.0178448
4.96514	0.000430673		5.13891	0.0178446
3.14734	0.0417904		5.14597	0.0178443
4.59372	0.000992758		5.16441	0.0178438
4.05101	0.00379285		5.22383	0.017842
2.8767	0.00359705		5.2322	0.0178417
2.98676	0.00642102		5.24978	0.0178412
4.23592	0.00601709		5.26152	0.0178408
4.82459	7.98113e-05		5.27329	0.0178404
3.47434	0.00407212		5.27837	0.0178403
3.86359	0.00681095		5.29468	0.0178398
4.05451	0.0478175		5.29782	0.0178397
4.97456	0.00629415		5.29928	0.0178396
2.61827	0.0108469		5.30739	0.0178394
3.78017	0.00160855		5.30851	0.0178394
3.73317	0.0221219		5.3133	0.0178392
1.61529	0.000556632		5.3331	0.0178386
3.25098	0.0124849		5.3351	0.0178385
4.65925	0.0130719		5.33715	0.0178385
3.75582	0.0426634		5.37797	0.0178372
3.64513	0.000859145		5.38012	0.0178372
2.39979	0.000795327		5.38965	0.0178369
3.81918	0.0243032		5.42027	0.0178359
3.15891	0.00055511		5.43656	0.0178354
3.54146	0.0159241		5.44387	0.0178352
2.95882	0		5.45541	0.0178348
2.2	0.000199279		5.45553	0.0178348
2.324	0.0105235		5.45665	0.0178348
3.26197	0.00141302		5.46744	0.0178345
2.34335	0.000170768		5.47456	0.0178343
2.27752	0.0238603		5.47901	0.0178341
1.66443	0.00184366		5.50248	0.0178334
2.57858	0.0386362		5.50943	0.0178332
1.06195	0.0157667		5.54728	0.017832
6.6865	3.74684e-05		5.56625	0.0178314
9.09335	0.0184633		5.57072	0.0178313
7.50104	0.0280348		5.58583	0.0178308
6.42502	0		5.58596	0.0178308
7.01735	0.00735307		5.60587	0.0178302
4.98847	0.000594655		5.63993	0.0178292
3.67532	0.292559		5.64348	0.0178291
11.696	0.0183623		5.64442	0.017829
5.50248	0.278149		5.65502	0.0178287
7.87148	0.000287102		5.66158	0.0178285
5.47456	0.014234		5.67061	0.0178282
5.89465	0.0606125		5.6723	0.0178282
9.02394	0.154667		5.71251	0.0178269
8.66099	2.11255e-05		5.72638	0.0178265
7.04612	0.0187932		5.733	0.0178263
6.38528	0.00824818		5.75057	0.0178258
6.12823	0.00484697		5.75589	0.0178256
3.49768	0.000256503		5.76038	0.0178255
3.55035	0.0624102		5.77471	0.017825
3.51918	0.0256009		5.77741	0.017825
3.39269	0.000429563		5.78879	0.0178246
4.36079	0.0126395		5.795	0.0178244
3.67241	0.0130399		5.81252	0.0178239
2.69117	0.0180807		5.81435	0.0178238
3.33305	0.0823765		5.83869	0.0178231
3.34245	0.020652		5.84176	0.017823
1.93385	0.0103744		5.86602	0.0178222
1.54774	0.000248942		5.87805	0.0178219
1.442	0.0136797		5.89465	0.0178214
1.07678	0.000109259		5.90147	0.0178211
7.28903	0		5.91006	0.0178209
5.10484	0.00152803		5.91067	0.0178209
6.64778	5.02602e-05		5.91341	0.0178208
3.92346	0.000980225		5.95524	0.0178195
3.9576	0.00848512		5.961	0.0178193
4.25905	0.000132118		5.96295	0.0178193
4.23216	2.81697e-05		5.97531	0.0178189
2.7389	0.00263104		6.00866	0.0178179
1.62128	0.000899486		6.00904	0.0178178
4.06341	5.39795e-05		6.01738	0.0178176
2.94688	0		6.02664	0.0178173
2.57666	0.00335988		6.03016	0.0178172
1.76414	3.74753e-05		6.03369	0.0178171
3.0943	2.7741e-05		6.06069	0.0178163
2.53254	4.52651e-05		6.07153	0.0178159
2.23132	0.00111222		6.09308	0.0178153
1.66621	0.000332934		6.09473	0.0178152
10.727	0.000232535		6.11619	0.0178145
7.40502	2.34841e-05		6.12092	0.0178144
9.57119	2.53854e-05		6.12823	0.0178142
5.77471	0.00143975		6.14873	0.0178135
4.16054	0.00200344		6.15177	0.0178135
4.8256	4.39024e-05		6.15506	0.0178134
6.23411	0.00478983		6.20136	0.0178119
4.71702	0.000101269		6.21818	0.0178114
4.29478	7.10803e-05		6.23411	0.0178109
4.31383	0		6.23554	0.0178109
5.45541	4.78364e-05		6.24245	0.0178107
3.54364	0		6.2485	0.0178105
4.00894	0.0031211		6.25334	0.0178103
4.12229	1.12159e-06		6.26955	0.0178098
1.80509	7.24576e-05		6.2909	0.0178092
2.89284	0.00764448		6.30494	0.0178088
2.22813	4.87504e-05		6.31383	0.0178085
2.39301	0		6.33099	0.017808
3.0297	0.00707644		6.33814	0.0178077
2.57076	5.56069e-05		6.34574	0.0178075
1.51783	0		6.3483	0.0178074
1.09109	0.0100311		6.36059	0.017807
1.40454	0.0088598		6.38528	0.0178063
15.9949	0.0227526		6.41247	0.0178054
8.31152	0.0901436		6.41653	0.0178053
6.74347	0.0422477		6.42035	0.0178052
6.97847	0.0112956		6.42502	0.0178051
6.3483	0.000741518		6.44872	0.0178043
5.30739	0.00445901		6.45443	0.0178042
8.1466	0.00382563		6.50841	0.0178025
6.81115	0		6.51856	0.0178022
5.83869	0.0336988		6.52469	0.017802
7.12486	0.0146315		6.52915	0.0178019
8.77163	0.00757956		6.52995	0.0178018
8.14804	0.0360164		6.5322	0.0178018
6.21818	0.0271125		6.54829	0.0178013
6.83754	0.000356664		6.55002	0.0178012
6.51856	0.0503383		6.58507	0.0178001
2.55186	0.000183958		6.59986	0.0177997
5.2322	0.0167423		6.64778	0.0177982
4.00727	0.0190132		6.6865	0.017797
3.43003	0.000159842		6.6934	0.0177968
3.90687	0.00759341		6.69993	0.0177966
4.2058	0.000560645		6.71657	0.0177961
4.01992	0.0337748		6.73438	0.0177956
3.65831	0.0199634		6.74347	0.0177953
5.33715	0.00779639		6.74479	0.0177952
2.65326	0.013344		6.74648	0.0177952
3.93847	0.0191654		6.75684	0.0177949
4.13491	0.00229686		6.77725	0.0177942
4.47005	0.0158571		6.80501	0.0177934
3.42076	0.0228775		6.81115	0.0177932
2.71439	0.00245844		6.82672	0.0177927
2.68656	0.0180554		6.8373	0.0177924
2.66707	0.000128154		6.83754	0.0177924
2.97244	6.85369e-05		6.864	0.0177916
2.69241	0		6.86515	0.0177915
2.37077	0.0117773		6.88074	0.0177911
2.21537	0.000129331		6.91356	0.0177901
2.15858	0.000177231		6.95921	0.0177887
14.9886	4.0628e-05		6.9726	0.0177882
9.42193	0		6.97624	0.0177881
8.56542	6.09565e-06		6.97711	0.0177881
8.26147	1.90144e-05		6.97847	0.0177881
8.4228	6.29179e-05		6.9868	0.0177878
5.64348	0.00218553		7.00936	0.0177871
7.75787	0		7.01061	0.0177871
6.20136	0.0001127		7.01309	0.017787
7.48503	1.76331e-06		7.01735	0.0177869
6.74648	4.61946e-05		7.02779	0.0177865
6.8373	0		7.04612	0.017786
4.19215	3.87105e-05		7.11458	0.0177839
5.81252	7.90799e-05		7.12486	0.0177836
5.75589	0.00208679		7.13078	0.0177834
3.90108	0.00317939		7.13615	0.0177832
4.51063	0.00571506		7.1457	0.0177829
4.51663	0.000150161		7.15157	0.0177827
4.87634	0		7.18565	0.0177817
3.45709	0.00658802		7.18771	0.0177816
3.03476	0.000585556		7.20733	0.017781
3.15062	0		7.2636	0.0177793
2.19242	0		7.28903	0.0177785
2.28648	0.00179492		7.30487	0.017778
2.56672	9.10448e-05		7.34217	0.0177769
1.51884	0		7.35418	0.0177765
7.15157	0.00520197		7.35423	0.0177765
8.08089	0.037808		7.38581	0.0177756
12.8148	0.00675552		7.40502	0.017775
9.39455	0.0355506		7.43282	0.0177741
8.49729	0.0463306		7.43737	0.017774
10.1287	0.00447831		7.43901	0.0177739
6.00904	0.00714342		7.45205	0.0177735
3.23456	0.00295202		7.48354	0.0177726
7.6614	0.000128323		7.48503	0.0177725
12.5115	0.000548326		7.48582	0.0177725
9.5847	0.000584805		7.48902	0.0177724
9.52734	0.0200016		7.50104	0.017772
4.88104	0.0503415		7.52242	0.0177714
7.99686	0.0350226		7.55059	0.0177705
11.551	0.0284615		7.60761	0.0177687
9.74682	0.0157017		7.62688	0.0177681
4.29822	0.0116757		7.63347	0.0177679
5.13891	0.00427258		7.63725	0.0177678
3.26943	0.00523113		7.65221	0.0177674
2.19348	0.000381016		7.65949	0.0177671
6.52915	0.0180176		7.6614	0.0177671
3.80876	0.0332125		7.67382	0.0177667
8.08683	0.0432083		7.70251	0.0177658
3.28785	0.000480791		7.70493	0.0177658
12.1598	0.000108962		7.74265	0.0177646
11.7313	0.000148452		7.75787	0.0177641
5.64442	8.01295e-05		7.77387	0.0177636
7.35418	5.98082e-05		7.77511	0.0177636
5.91006	0.00774687		7.79728	0.0177629
11.4411	0.00315076		7.79766	0.0177629
11.6985	0.0099661		7.80727	0.0177626
7.81557	4.46087e-05		7.81557	0.0177624
4.48895	4.75601e-05		7.8276	0.017762
6.54829	6.21206e-05		7.83748	0.0177617
3.22785	0.000614938		7.87148	0.0177606
4.4391	2.09619e-05		7.90385	0.0177596
4.16631	0		7.92823	0.0177589
4.06134	1.63151e-05		7.92884	0.0177589
1.26325	2.92293e-05		7.95166	0.0177582
11.233	1.94882e-05		7.99686	0.0177568
12.4399	0.000290187		8.00717	0.0177565
1.39167	0.00293695		8.08089	0.0177542
10.3109	0.000240221		8.08683	0.017754
6.12092	0.000101932		8.13524	0.0177525
6.97711	0.00122312		8.13815	0.0177524
2.25011	4.34896e-05		8.1466	0.0177522
4.80075	3.937e-05		8.14804	0.0177521
2.50646	9.3577e-05		8.17933	0.0177512
9.07784	0.00139732		8.18423	0.017751
9.68381	0.018823		8.21843	0.01775
4.85817	0.000243441		8.23762	0.0177494
5.29782	0.000642105		8.26147	0.0177487
7.67382	0.000126418		8.31152	0.0177471
3.71535	0.013034		8.32137	0.0177468
6.42035	9.44221e-05		8.32642	0.0177467
9.58723	1.34948e-05		8.33419	0.0177464
4.7635	0.0048188		8.4228	0.0177437
7.18771	0.000426244		8.49729	0.0177414
5.795	7.64084e-05		8.50682	0.0177411
2.05705	2.79777e-05		8.56542	0.0177393
1.99983	4.28056e-05		8.62206	0.0177376
3.0548	0.00379938		8.64162	0.017737
2.03999	0.00010398		8.64582	0.0177369
6.95921	0.00455724		8.65453	0.0177366
14.9478	0.00350195		8.66099	0.0177364
1.88964	0.0023409		8.70201	0.0177351
4.37642	0.00335255		8.74317	0.0177339
7.1457	0.000135392		8.76127	0.0177333
4.50412	4.32467e-05		8.76318	0.0177332
2.69449	0.000139791		8.76388	0.0177332
3.47575	0.000316887		8.77163	0.017733
3.51617	8.30448e-05		8.77766	0.0177328
6.52469	0		8.79224	0.0177324
3.09358	0.00805064		8.81117	0.0177318
7.80727	0.00149938		8.81961	0.0177315
7.48582	0		8.83121	0.0177312
6.52995	0.000249169		8.83588	0.017731
9.10083	4.16548e-05		8.84375	0.0177308
5.77741	0.00133584		8.84979	0.0177306
5.67061	3.1072e-05		8.86075	0.0177303
1.73562	0.00052621		8.93633	0.0177279
4.89589	4.35241e-05		8.94223	0.0177277
1.10598	1.65904e-05		8.95572	0.0177273
4.19318	4.68563e-05		8.96604	0.017727
8.13815	0		9.02394	0.0177252
6.9868	7.64663e-05		9.05703	0.0177242
6.6934	0.000272648		9.07784	0.0177236
0.816596	3.87914e-05		9.09335	0.0177231
5.47901	0.00504238		9.10083	0.0177229
3.49099	0		9.11927	0.0177223
4.45482	0		9.29551	0.0177169
3.90006	6.77906e-05		9.33763	0.0177156
4.16323	0.0195625		9.38626	0.0177141
7.90385	0.0112574		9.39455	0.0177139
7.48354	0		9.42193	0.017713
2.66613	0.000165765		9.50102	0.0177106
8.50682	7.1732e-05		9.52734	0.0177098
7.8276	4.5579e-05		9.57119	0.0177084
5.961	6.13878e-05		9.5847	0.017708
6.11619	0.0036444		9.58723	0.0177079
10.264	0.0115406		9.64818	0.0177061
3.54106	2.47125e-05		9.68381	0.017705
5.66158	0.00141185		9.74682	0.017703
4.29827	0.00286583		10.1287	0.0176913
4.35561	0.000152749		10.145	0.0176908
3.94444	0.00539018		10.264	0.0176872
5.58596	0.000447284		10.2688	0.017687
6.73438	0.000122931		10.3109	0.0176857
8.76318	0.0313495		10.649	0.0176753
2.8237	0.00554003		10.727	0.0176729
8.32642	0.016192		10.8274	0.0176698
12.2203	0.0111375		10.8938	0.0176678
25.9643	0.0543728		10.9567	0.0176659
4.07756	0.0312762		11.233	0.0176574
5.45553	0.00259153		11.3648	0.0176533
5.0391	0.0225111		11.4048	0.0176521
10.2688	0.0511605		11.4411	0.017651
8.84979	0.0189526		11.4627	0.0176503
11.9972	0.0142296		11.551	0.0176476
6.55002	0.00626922		11.5607	0.0176473
7.95166	0.00160759		11.696	0.0176432
6.09308	0.045945		11.6985	0.0176431
7.74265	4.89805e-05		11.7313	0.0176421
6.74479	0.0189904		11.7559	0.0176413
11.4048	0.046039		11.8953	0.017637
5.90147	0.0360183		11.9123	0.0176365
6.58507	0.0641367		11.9972	0.0176339
6.88074	0.143307		12.0705	0.0176317
4.83019	0.00688324		12.0828	0.0176313
3.41302	0.0358376		12.1193	0.0176302
3.17539	0.000794706		12.1598	0.0176289
5.81435	0.0719273		12.2203	0.0176271
3.72061	0.000132983		12.4189	0.017621
7.63725	0.037785		12.4399	0.0176203
13.113	0.00294054		12.5115	0.0176181
8.83121	0.000715335		12.6458	0.017614
4.79861	3.05061e-05		12.7198	0.0176117
11.9123	3.04634e-05		12.8148	0.0176088
6.45443	0.0185324		12.82	0.0176086
11.7559	0.0434561		12.9663	0.0176042
7.77387	0.0415795		13.0188	0.0176025
4.29304	0.000219886		13.113	0.0175996
4.05631	8.68549e-05		13.4328	0.0175898
8.81961	0.0395012		14.0967	0.0175694
3.15879	0		14.4937	0.0175572
4.60758	3.60329e-05		14.8634	0.0175459
5.26152	0.00241873		14.9478	0.0175433
5.27329	0.00872941		14.9886	0.017542
6.03369	0.00388761		15.0683	0.0175396
7.60761	0.0214618		15.9949	0.0175111
3.90808	0.022385		17.0629	0.0174783
1.86329	2.36954e-05		17.2943	0.0174712
4.88948	0.00990113		17.4175	0.0174674
3.73967	0.00425338		17.7615	0.0174569
5.78879	0.0529271		19.0466	0.0174174
3.82521	0.0891167		22.025	0.0173259
7.01061	0.0031637		25.9643	0.0172049
4.0445	0		27.7673	0.0171496
2.44946	0.00988452		30.2531	0.0170732
4.44381	0.0780436		38.7178	0.0168132

## Sheet: panel g
Information (bits)
SNR low	SNR high			MEAN	SEM
0.00225184	0.00614687		SNR low	0.0100733	0.00101928
0.00857842	0.00238348		SNR high	0.0189071	0.00142659
0.0083754	0.0174266
0.00590935	0.00350077
0.00937491	0.00280967
0.0103309	0.00351762
0.00904574	0.00361853
0.0100186	0.00189292
0.0154608	0.0123556
0.0109348	0.00172946
0.00513658	0.000686167
0.00525839	0.00125992
0.000729206	0.00341013
0.00129318	0.0023689
0.000996345	0.0105811
0.0192051	0.00179953
0.0014205	0.026661
0.00246034	0.000454661
0.00447884	0.00681498
0.00249183	0.0186131
0.00369453	0.0227358
0.0111059	0.000376983
0.00451978	0.0354384
0.00470417	0.00114095
0.00178767	0.000107196
0.00733681	0.0108097
0.00233221	0.00250319
0.0052946	0.0363718
0.010058	0.0464572
0.000366529	0.0140132
0.00564518	0.000235895
0.00856513	0.000608565
0.00520251	0.0744573
0.00964444	0.00726681
0.0113285	0.00270968
0.0047032	0.000517923
0.00074608	0
0.00265922	0.00249006
0.00558309	0.045428
0.00480753	0.000936308
0.00420599	0.0114379
0.00880296	0.0447997
0.00568885	0.038867
0.000326748	0.07309
0.00819228	0.0413069
0.00948305	0.0926338
0.000319957	0.0226074
0.00638509	0.0349598
0.00315666	0.000285073
0.00182559	0.0102705
0.001049	0.00942516
0.0015274	0.00016385
0.0545202	0.0426394
0.00138089	0.0204146
0.00660733	0.0159895
0.0150669	0.0830326
0.0084043	0.0205019
0.00166535	0.0301719
0.00457628	0.0135199
0.00895424	0.00217634
0.0022455	0.0170158
0.0266826	0.000766956
0.000164495	0.000589646
0.000621898	0.000721883
0.00169533	0.0289099
0.0101702	0.000150027
0.00700475	0.0215437
0.00102016	0.0443871
0.0129689	0.00581542
1.57533e-05	0.0298185
0.0415464	0.0762835
0	0.0392805
5.16846e-05	0.0424099
0.000648025	0.0579658
0.025937	0.0237004
0.00878883	0.00765895
0.000949823	0.00919134
0.027216	0.00902678
0.0158474	0.0011934
0.000255429	0.0671157
0.00148362	0.000354832
0.00275712	0.0136075
0.00760743	0.0460617
0.0029203	0.0364831
0.00120184	0.00227622
0.00064009	0.0932369
0.000870006	0.101694
0.000243096	0.0932856
0.0131835	0.101842
0.0023967	0.0664759
0.00779337	0.0413985
0.0033288	0.0273498
0.0084539	0.0281181
0.000527987	0.0269813
0.000120259	0.0271131
0.0297771	0.0796813
0.0108324	0.0120104
0.00237865	0.0790826
0.000169939	0.148664
7.02296e-05	0.0449682
0.0145628	0.0630852
0.00107586	0.0674509
0.00966936	0.0254822
0.000539728	0.0750525
0.0304056	0.0524816
0.0267244	0.0432557
0.00520283	0.0317404
0.0269319	0.111859
0.0356502	0.0318291
0.000520686	0.060744
0.00064319	0.00501228
0.000248856	0.0089337
0.0130251	0.092973
0.0175091	0.109856
0.00538804	0.0191457
0.0161665	0.0509453
0.00794186	0.0302586
0.00136639	0.0283419
0.00226097	0.0522816
0.00857832	0.0732256
0.00841458	0.00035703
0.00108115	0.103839
0.000251324	0.093166
0.0137153	0.108179
0.00117735	0.0498522
0.00100231	0.0152185
0	0.0439473
0.0521892	0.0146024
0.00765	0.00907944
0.00438412	7.68605e-05
0.020736	0.00711668
0.000792064	0.00647828
0.0106261	0.00672869
0.0113685	0.000124605
0.00027167	0.000322166
0.0201402	0.00299655
0.000198543	0.00499095
0.000376757	0.00277047
0.00199959	0
0.00284374	0.0228385
0.00119638	0.0166525
0.0594002	0.0113896
0.00387216	0.0110038
0.0337313	0.000157743
0.00786229	0.000324682
0.0163997	0.0165518
0.00530443	0.0027961
0.00899207	0.000142928
0.0109639	0.000146348
0.0567369	0.00412628
0.00237666	0.00153395
0.00229931	0.0215633
0.0599246	0.00457812
0.0302036	0.0021246
0.0271707	0.00172211
0.0176292	0.0100917
0.0130796	0.00618287
0.00846495	0.00925983
5.42135e-05	0.000431898
0.00578052	0.013978
0.0292594	0.0168681
0.000363936	0.00545204
5.24602e-05	0.00376409
0.0124366	0.0429477
0.0414967	0.0165825
0.0360397	0.0123746
0.00986105	0.0715148
5.13129e-05	0.00177763
0.000102626	0.0243167
0.00288342	0.0193767
0	0.0492098
0.0268027	0.00546117
0.000631591	0.039289
0.0483584	0.00906704
0.000309584	0.0312829
0.00317963	0.00995944
0.000344186	0.00186144
0.00581802	0.0168291
3.5652e-06	0.0427101
0.0053692	0.085629
0.000100058	0.0239572
0.00159355	0.0582177
0.000297941	0.0555896
0.00079742	0.00107949
0.000256456	0.0209031
0.00211552	0.0791399
0.00477276	0.029541
0.00397006	0.00611212
0.00268567	0.000525482
1.61694e-05	0.0214058
0.00037703	0.0106303
6.73612e-05	0.0015327
0.000228162	0.00550747
0.00276206	0.00430304
0.000515738	0.00165231
0.00067532	0.0243846
0.000125518	0.0123579
0.000315603	0.00360245
0.000186968	0.00808808
0.000775655	0.00137534
0.00207065	0.019113
0.0337636	0.000840325
0.000922614	0.0005375
0.0312849	0.0239555
0.0082935	0.00725645
0.000592544	0.0161839
0.00680273	0.0072091
0.0186221	0.000451257
0.00828958	0.00210778
0.00378295	0.00202381
0.00184027	0.00756622
0.0150106	0.000596884
0.0765132	0.00229615
0.000592544	0
0.00571352	0.00307684
0.00454229	0.0430157
0.00211938	0.00822706
0.00363905	0.000216375
0.00178684	0.000362748
0.00441257	0.00302607
0.0160769	0.000716768
0.0372961	0.0170514
0.0298548	9.67735e-05
0.0806586	0.011504
0.0128013	0.0120384
0.00593611	0.00470291
0.0046262	0.00175959
0.00585314	0.00534686
0.01395	0.00125262
0.0264309	0.0054128
0.0581919	0.0154147
0.13154	0.000197007
0.00143179	0.00214877
0.00139469	0.000425889
0.00337051	0.00369815
0.0334534	0.00229784
0.0743645	0.00328737
0.00468559	0.0213654
0.0435496	0.000176636
0.00824333	0.0294292
0.00109417	0.000430673
0.000778839	0.000992758
0.0158671	7.98113e-05
0.0304155	0.00629415
0.000819335	0.0130719
0.00502364	3.74684e-05
0.00319774	0.0184633
0.00479729	0.0280348
0.000134266	0
0.000351041	0.00735307
0.0023644	0.000594655
0.00293168	0.0183623
0.00739394	0.278149
0.0756441	0.000287102
0.00168104	0.014234
0.000181374	0.0606125
0.0104163	0.154667
0.00750874	2.11255e-05
0.00181771	0.0187932
0.000924604	0.00824818
0.0113527	0.00484697
0.000671167	0.0126395
0.0494806	0
0.000243752	0.00152803
0.00341061	5.02602e-05
0.00142639	0.000232535
0.0196534	2.34841e-05
0	2.53854e-05
0.00910935	0.00143975
0.00297865	4.39024e-05
0	0.00478983
0.0128882	0.000101269
0.00193844	0
0.00929644	4.78364e-05
0.00215023	0.0227526
0.00258587	0.0901436
0.00101977	0.0422477
0.0417904	0.0112956
0.00379285	0.000741518
0.00359705	0.00445901
0.00642102	0.00382563
0.00601709	0
0.00407212	0.0336988
0.00681095	0.0146315
0.0478175	0.00757956
0.0108469	0.0360164
0.00160855	0.0271125
0.0221219	0.000356664
0.000556632	0.0503383
0.0124849	0.0167423
0.0426634	0.00779639
0.000859145	0.0158571
0.000795327	4.0628e-05
0.0243032	0
0.00055511	6.09565e-06
0.0159241	1.90144e-05
0	6.29179e-05
0.000199279	0.00218553
0.0105235	0
0.00141302	0.0001127
0.000170768	1.76331e-06
0.0238603	4.61946e-05
0.00184366	0
0.0386362	7.90799e-05
0.0157667	0.00208679
0.292559	0.00571506
0.000256503	0.000150161
0.0624102	0
0.0256009	0.00520197
0.000429563	0.037808
0.0130399	0.00675552
0.0180807	0.0355506
0.0823765	0.0463306
0.020652	0.00447831
0.0103744	0.00714342
0.000248942	0.000128323
0.0136797	0.000548326
0.000109259	0.000584805
0.000980225	0.0200016
0.00848512	0.0503415
0.000132118	0.0350226
2.81697e-05	0.0284615
0.00263104	0.0157017
0.000899486	0.00427258
5.39795e-05	0.0180176
0	0.0432083
0.00335988	0.000108962
3.74753e-05	0.000148452
2.7741e-05	8.01295e-05
4.52651e-05	5.98082e-05
0.00111222	0.00774687
0.000332934	0.00315076
0.00200344	0.0099661
7.10803e-05	4.46087e-05
0	4.75601e-05
0.0031211	6.21206e-05
1.12159e-06	2.09619e-05
7.24576e-05	1.94882e-05
0.00764448	0.000290187
4.87504e-05	0.000240221
0	0.000101932
0.00707644	0.00122312
5.56069e-05	3.937e-05
0	0.00139732
0.0100311	0.018823
0.0088598	0.000243441
0.000183958	0.000642105
0.0190132	0.000126418
0.000159842	9.44221e-05
0.00759341	1.34948e-05
0.000560645	0.0048188
0.0337748	0.000426244
0.0199634	7.64084e-05
0.013344	0.00455724
0.0191654	0.00350195
0.00229686	0.00335255
0.0228775	0.000135392
0.00245844	4.32467e-05
0.0180554	0
0.000128154	0.00149938
6.85369e-05	0
0	0.000249169
0.0117773	4.16548e-05
0.000129331	0.00133584
0.000177231	3.1072e-05
3.87105e-05	4.35241e-05
0.00317939	0
0.00658802	7.64663e-05
0.000585556	0.000272648
0	0.00504238
0	0
0.00179492	0.0112574
9.10448e-05	0
0	7.1732e-05
0.00295202	4.5579e-05
0.0116757	6.13878e-05
0.00523113	0.0036444
0.000381016	0.0115406
0.0332125	0.00141185
0.000480791	0.00286583
0.000614938	0.000152749
0	0.000447284
1.63151e-05	0.000122931
2.92293e-05	0.0313495
0.00293695	0.016192
4.34896e-05	0.0111375
9.3577e-05	0.0543728
0.013034	0.00259153
2.79777e-05	0.0225111
4.28056e-05	0.0511605
0.00379938	0.0189526
0.00010398	0.0142296
0.0023409	0.00626922
0.000139791	0.00160759
0.000316887	0.045945
8.30448e-05	4.89805e-05
0.00805064	0.0189904
0.00052621	0.046039
1.65904e-05	0.0360183
4.68563e-05	0.0641367
3.87914e-05	0.143307
0	0.00688324
6.77906e-05	0.0719273
0.0195625	0.037785
0.000165765	0.00294054
2.47125e-05	0.000715335
0.00539018	3.05061e-05
0.00554003	3.04634e-05
0.0312762	0.0185324
0.0358376	0.0434561
0.000794706	0.0415795
0.000132983	0.0395012
0.000219886	3.60329e-05
8.68549e-05	0.00241873
0	0.00872941
0.022385	0.00388761
2.36954e-05	0.0214618
0.00425338	0.00990113
0.0891167	0.0529271
0	0.0031637
0.00988452	0.0780436

## Sheet: panel h
Synergistic					Redundant
Pairwise correlation (x)	Information (bits) (y)	Linear regression fit of data (x)	Linear regression fit of data (y)		Pairwise correlation (x)	Information (bits) (y)	Linear regression fit of data (x)	Linear regression fit of data (y)
0.214816	0.0111849	0.00447853	0.00710446		0.943376	-0.00242728	0.0143675	0.00554368
0.0514431	0.028524	0.0514431	0.00750898		0.871264	-0.0136035	0.138877	0.00193474
0.958965	0.0404292	0.0565264	0.00755276		0.682421	-0.0026157	0.195054	0.000306436
0.76874	0.0281193	0.0576017	0.00756203		0.276311	-0.00175016	0.196284	0.000270774
0.844794	0.0285393	0.0590215	0.00757425		0.504904	-0.000780392	0.276311	-0.00204883
0.631589	0.01292	0.1283	0.00817098		0.706351	-0.0112822	0.306904	-0.00293558
0.925094	0.0053258	0.144199	0.00830792		0.138877	-4.81486e-06	0.345732	-0.00406103
0.390472	0.00307144	0.155681	0.00840682		0.35376	-0.00172041	0.35376	-0.00429372
0.1283	0.00293459	0.160137	0.0084452		0.195054	-0.000884673	0.485592	-0.00811492
0.0590215	0.00158599	0.166197	0.0084974		0.678037	-0.00897287	0.504904	-0.00867466
0.491681	0.00741856	0.214816	0.00891617		0.813629	-0.0402709	0.579003	-0.0108224
0.564503	0.00313364	0.240324	0.00913588		0.306904	-0.00123543	0.583429	-0.0109508
0.735702	0.0132413	0.25301	0.00924515		0.713027	-0.0230304	0.601273	-0.011468
0.700514	0.00396541	0.263668	0.00933696		0.830201	-0.0153922	0.621616	-0.0120576
0.54389	0.00426116	0.282765	0.00950144		0.345732	-0.00570697	0.627345	-0.0122237
0.67034	0.0207361	0.284821	0.00951915		0.688969	-0.0232957	0.678037	-0.013693
0.479221	0.00660077	0.28645	0.00953318		0.735077	-0.0307391	0.682421	-0.0138201
0.58396	0.00243359	0.309786	0.00973418		0.77414	-0.0372805	0.688969	-0.0140099
0.365621	0.000735926	0.324469	0.00986066		0.774539	-0.0137935	0.706351	-0.0145137
0.60638	0.00396963	0.335917	0.00995926		0.485592	-0.00244171	0.713027	-0.0147072
0.587764	0.00145937	0.356268	0.0101346		0.583429	-0.00360674	0.735077	-0.0153463
0.7413	0.000903205	0.35954	0.0101627		0.601273	-0.015088	0.753724	-0.0158868
0.704173	0.00121571	0.365408	0.0102133		0.753724	-0.0119316	0.7642	-0.0161905
0.541877	0.00251237	0.365621	0.0102151		0.579003	-0.00317395	0.77414	-0.0164786
0.00447853	0.0155704	0.384634	0.0103789		0.857317	-0.00555467	0.774539	-0.0164901
0.535442	0.024187	0.390472	0.0104292		0.627345	-0.00222364	0.813629	-0.0176232
0.555739	0.02786	0.39351	0.0104553		0.196284	-0.000256476	0.830201	-0.0181035
0.28645	0.0076411	0.398366	0.0104972		0.0143675	-0.00143068	0.857317	-0.0188895
0.54868	0.0471427	0.414207	0.0106336		0.91565	-0.0301863	0.871264	-0.0192937
0.155681	0.045999	0.479221	0.0111936		0.7642	-0.0356048	0.91565	-0.0205803
0.309786	0.0280079	0.487149	0.0112619		0.621616	-0.000320499	0.943376	-0.0213839
0.809901	0.0936891	0.491681	0.0113009
0.0576017	0.015211	0.535442	0.0116778
0.0565264	0.022217	0.541877	0.0117333
0.240324	0.00436635	0.54389	0.0117506
0.356268	0.0074943	0.54868	0.0117919
0.166197	0.00375388	0.555739	0.0118527
0.570441	0.00881067	0.564503	0.0119282
0.282765	0.00326924	0.570441	0.0119793
0.35954	0.000279525	0.571136	0.0119853
0.160137	0.0103815	0.577495	0.0120401
0.365408	0.00336708	0.58396	0.0120958
0.384634	0.0102123	0.587764	0.0121285
0.324469	0.011895	0.591829	0.0121635
0.693808	0.00800605	0.60638	0.0122889
0.577495	0.00418897	0.628352	0.0124781
0.144199	0.00135226	0.631589	0.012506
0.591829	0.00226184	0.67034	0.0128398
0.487149	0.00851669	0.693427	0.0130386
0.284821	0.00392332	0.693808	0.0130419
0.335917	8.59253e-05	0.700514	0.0130997
0.972962	0.0010863	0.704173	0.0131312
0.25301	0.0010701	0.735702	0.0134028
0.628352	0.00230222	0.7413	0.013451
0.94446	0.00560724	0.76874	0.0136873
0.39351	0.00158712	0.809901	0.0140419
0.693427	0.000197488	0.844794	0.0143424
0.414207	0.00200691	0.925094	0.0150341
0.571136	0.00400584	0.94446	0.0152009
0.398366	0.000607308	0.958965	0.0153258
0.263668	0.00285052	0.972962	0.0154464

## Sheet: panel i
Synergistic					Redundant
Radial distance (µm) (x)	Information (bits) (y)	Linear regression fit of data (x)	Linear regression fit of data (y)		Radial distance (µm) (x)	Information (bits) (y)	Linear regression fit of data (x)	Linear regression fit of data (y)
154.124	0.0111849	7.96326	0.0178872		139.095	-0.00242728	7.95625	-0.0133162
155.909	0.028524	9.4756	0.0177723		46.8506	-0.0136035	23.5111	-0.0129912
28.4442	0.0404292	24.2562	0.0166498		72.3939	-0.0026157	31.1256	-0.0128321
32.2994	0.0281193	24.6573	0.0166194		82.2315	-0.00175016	31.8934	-0.012816
61.7684	0.0285393	25.0304	0.016591		109.879	-0.000780392	46.8506	-0.0125035
150.364	0.01292	28.4442	0.0163318		56.0521	-0.0112822	56.0521	-0.0123112
117.631	0.0053258	28.4557	0.0163309		162.052	-4.81486e-06	61.0692	-0.0122064
119.876	0.00307144	28.8324	0.0163023		121.358	-0.00172041	72.3939	-0.0119697
121.872	0.00293459	29.2171	0.0162731		179.83	-0.000884673	82.2315	-0.0117642
154.124	0.00158599	32.2994	0.016039		162.099	-0.00897287	93.6794	-0.011525
108.355	0.00741856	38.4685	0.0155705		158.283	-0.0402709	98.0152	-0.0114344
69.8173	0.00313364	43.6104	0.01518		163.993	-0.00123543	101.911	-0.011353
169.29	0.0132413	50.3224	0.0146703		104.5	-0.0230304	103.509	-0.0113196
98.9687	0.00396541	51.9723	0.014545		31.8934	-0.0153922	104.5	-0.0112988
95.1066	0.00426116	52.3379	0.0145172		135.095	-0.00570697	107.848	-0.0112289
24.6573	0.0207361	59.2924	0.013989		167.991	-0.0232957	109.879	-0.0111865
68.9597	0.00660077	61.7684	0.013801		156.423	-0.0307391	121.358	-0.0109466
160.865	0.00243359	63.9419	0.0136359		103.509	-0.0372805	135.095	-0.0106596
162.721	0.000735926	65.6295	0.0135078		31.1256	-0.0137935	139.095	-0.010576
133.4	0.00396963	68.9597	0.0132549		98.0152	-0.00244171	142.115	-0.0105129
59.2924	0.00145937	69.8173	0.0131897		93.6794	-0.00360674	142.681	-0.010501
176.446	0.000903205	72.4308	0.0129913		23.5111	-0.015088	145.528	-0.0104416
159.542	0.00121571	80.3519	0.0123897		142.115	-0.0119316	146.726	-0.0104165
192.94	0.00251237	82.6468	0.0122154		61.0692	-0.00317395	156.423	-0.0102139
65.6295	0.0155704	84.5815	0.0120685		158.911	-0.00555467	158.283	-0.010175
43.6104	0.024187	88.1383	0.0117984		146.726	-0.00222364	158.911	-0.0101619
80.3519	0.02786	90.5368	0.0116162		145.528	-0.000256476	162.052	-0.0100963
154.579	0.0076411	95.1066	0.0112691		101.911	-0.00143068	162.099	-0.0100953
72.4308	0.0471427	95.6219	0.01123		7.95625	-0.0301863	163.993	-0.0100557
138.576	0.045999	96.5517	0.0111594		142.681	-0.0356048	167.991	-0.00997216
29.2171	0.0280079	97.5132	0.0110864		107.848	-0.000320499	179.83	-0.00972478
50.3224	0.0936891	98.9687	0.0109758
38.4685	0.015211	100.526	0.0108576
52.3379	0.022217	104.35	0.0105672
110.507	0.00436635	104.861	0.0105283
100.526	0.0074943	105.858	0.0104526
105.858	0.00375388	108.355	0.010263
97.5132	0.00881067	110.507	0.0100996
25.0304	0.00326924	117.631	0.00955857
51.9723	0.000279525	119.876	0.00938807
160.814	0.0103815	121.872	0.0092365
63.9419	0.00336708	131.734	0.00848748
160.789	0.0102123	133.4	0.00836099
140.916	0.011895	136.825	0.00810085
28.8324	0.00800605	138.576	0.00796792
104.861	0.00418897	140.916	0.00779019
84.5815	0.00135226	150.364	0.00707266
82.6468	0.00226184	150.983	0.00702566
96.5517	0.00851669	154.124	0.00678714
90.5368	0.00392332	154.579	0.00675256
88.1383	8.59253e-05	155.909	0.0066516
28.4557	0.0010863	159.542	0.00637562
136.825	0.0010701	160.789	0.00628092
7.96326	0.00230222	160.814	0.00627902
24.2562	0.00560724	160.865	0.00627521
9.4756	0.00158712	162.721	0.00613422
104.35	0.000197488	162.816	0.00612701
95.6219	0.00200691	169.29	0.00563535
131.734	0.00400584	176.446	0.00509191
162.816	0.000607308	192.94	0.00383929
150.983	0.00285052

## Sheet: panel k
WMI	Sparseness		Fit (x)	Fit (y)
0.462085	0.794025		-0.776146	0.501789
0.900143	0.604004		-0.403389	0.473712
-0.776146	0.499875		-0.346452	0.469424
0.906944	0.263916		-0.306088	0.466383
0.94954	0.295529		-0.281922	0.464563
0.795151	0.432513		-0.242815	0.461618
0.786415	0.458735		-0.205845	0.458833
0.823793	0.414966		-0.186511	0.457377
0.809764	0.499307		-0.151417	0.454733
0.913346	0.349076		-0.144715	0.454228
0.819199	0.347742		-0.136774	0.45363
0.690704	0.295594		-0.122032	0.45252
0.951643	0.341151		-0.118217	0.452233
0.926387	0.276907		-0.104349	0.451188
0.587312	0.647192		-0.0699656	0.448598
0.697393	0.554992		-0.063301	0.448096
0.410894	0.326269		-0.0523147	0.447269
0.360441	0.357439		-0.048329	0.446968
0.859322	0.288734		-0.044687	0.446694
0.800621	0.266984		-0.0402605	0.446361
0.814504	0.482246		-0.0268109	0.445348
-0.044687	0.371852		-0.0109291	0.444151
0.850872	0.544544		-0.00801137	0.443932
0.884811	0.409237		0.00489024	0.44296
0.779349	0.259187		0.0187211	0.441918
0.733965	0.345996		0.0236127	0.44155
0.0687139	0.344475		0.0377881	0.440482
0.613224	0.424255		0.0413125	0.440216
0.8737	0.311669		0.0427443	0.440109
0.459958	0.405845		0.0478765	0.439722
0.723838	0.335761		0.048374	0.439685
0.791387	0.210452		0.0556893	0.439134
0.423296	0.339162		0.0617697	0.438676
0.071809	0.516205		0.0661615	0.438345
0.772655	0.306679		0.0672139	0.438265
-0.403389	0.320497		0.0672339	0.438264
0.638834	0.297004		0.0687139	0.438153
-0.306088	0.375715		0.0710859	0.437974
0.454214	0.570617		0.07176	0.437923
0.742321	0.213141		0.071809	0.437919
0.405337	0.219369		0.07333	0.437805
0.44972	0.256938		0.0746517	0.437705
-0.281922	0.305138		0.0794471	0.437344
-0.0523147	0.796361		0.0827919	0.437092
0.00489024	0.610007		0.0865194	0.436811
0.105569	0.596421		0.0893326	0.436599
-0.346452	0.699713		0.0943618	0.436221
0.350634	0.501629		0.103343	0.435544
0.330621	0.648217		0.103425	0.435538
-0.00801137	0.619157		0.105569	0.435376
0.429653	0.644464		0.114617	0.434695
0.251833	0.727855		0.117208	0.4345
0.437007	0.468083		0.12065	0.434241
0.305344	0.538498		0.122194	0.434124
0.179211	0.425007		0.125071	0.433908
0.331691	0.447852		0.142341	0.432607
0.454127	0.360482		0.144574	0.432439
0.272012	0.373782		0.146436	0.432298
0.0556893	0.759793		0.150811	0.431969
0.0943618	0.600635		0.151017	0.431953
0.0427443	0.374676		0.156577	0.431535
0.390757	0.383159		0.15676	0.431521
-0.0268109	0.600031		0.159373	0.431324
-0.0699656	0.354986		0.17247	0.430337
0.485696	0.419135		0.173127	0.430288
0.0672139	0.233839		0.178883	0.429854
0.189952	0.259817		0.179211	0.42983
0.677335	0.159798		0.179878	0.429779
0.0478765	0.305292		0.184845	0.429405
0.488956	0.218245		0.186166	0.429306
0.244357	0.258624		0.189952	0.429021
-0.063301	0.247012		0.191969	0.428869
0.0827919	0.203581		0.199849	0.428275
0.173127	0.268891		0.205763	0.42783
0.675146	0.166591		0.207626	0.427689
0.293181	0.167579		0.212625	0.427313
0.0236127	0.291801		0.212889	0.427293
0.301274	0.19053		0.231056	0.425925
0.151017	0.238236		0.234572	0.42566
-0.136774	0.372848		0.243068	0.42502
0.419111	0.261866		0.244357	0.424923
0.17247	0.225794		0.251833	0.42436
0.0865194	0.316635		0.252807	0.424286
0.186166	0.1919		0.255558	0.424079
0.103343	0.269556		0.2617	0.423616
0.0893326	0.280674		0.262809	0.423533
0.234572	0.232522		0.272012	0.42284
0.401014	0.524066		0.272442	0.422807
0.360996	0.355652		0.281935	0.422092
0.451616	0.387048		0.282155	0.422076
0.255558	0.288663		0.284175	0.421924
0.516399	0.687966		0.289644	0.421512
0.404286	0.672645		0.293181	0.421245
0.553104	0.672039		0.29872	0.420828
-0.242815	0.538068		0.301274	0.420636
0.289644	0.574969		0.301862	0.420591
0.303035	0.55412		0.303035	0.420503
0.511896	0.593055		0.305344	0.420329
-0.205845	0.622478		0.306899	0.420212
0.522577	0.510912		0.311029	0.419901
0.720477	0.361985		0.315857	0.419537
0.212625	0.567329		0.316755	0.41947
0.317485	0.376372		0.317485	0.419415
0.618035	0.328482		0.318001	0.419376
0.301862	0.391619		0.327988	0.418623
0.103425	0.414115		0.330621	0.418425
0.346698	0.415877		0.331691	0.418345
0.553087	0.336093		0.335672	0.418045
0.272442	0.394264		0.336612	0.417974
0.243068	0.426451		0.33988	0.417728
0.447149	0.506063		0.346698	0.417214
0.12065	0.436447		0.350634	0.416918
0.122194	0.403965		0.352805	0.416754
0.484024	0.517236		0.360441	0.416179
0.144574	0.540722		0.360996	0.416137
0.318001	0.512188		0.368597	0.415565
0.178883	0.629969		0.374375	0.415129
-0.151417	0.532337		0.386464	0.414219
0.15676	0.446686		0.390757	0.413896
0.723656	0.26644		0.392051	0.413798
0.125071	0.414889		0.398784	0.413291
0.571352	0.467745		0.40011	0.413191
0.335672	0.537453		0.401014	0.413123
0.414624	0.481138		0.404286	0.412876
0.444932	0.463324		0.404881	0.412832
0.142341	0.37416		0.405337	0.412797
-0.0402605	0.638339		0.408226	0.41258
0.0794471	0.815074		0.410894	0.412379
0.231056	0.666593		0.414624	0.412098
0.48564	0.550626		0.418282	0.411822
0.316755	0.530728		0.419111	0.41176
0.431452	0.4946		0.420507	0.411655
0.408226	0.446542		0.423296	0.411445
0.5042	0.570724		0.424414	0.41136
0.0187211	0.383414		0.429155	0.411003
0.306899	0.475697		0.429653	0.410966
0.682179	0.364242		0.431452	0.41083
0.450372	0.533728		0.437007	0.410412
0.424414	0.496658		0.444932	0.409815
0.477532	0.616198		0.447149	0.409648
0.605474	0.483434		0.44972	0.409454
0.2617	0.43073		0.450372	0.409405
0.156577	0.516028		0.450549	0.409392
-0.0109291	0.501294		0.451616	0.409311
0.545387	0.413618		0.454119	0.409123
0.69911	0.341657		0.454127	0.409122
0.281935	0.510288		0.454214	0.409116
0.589657	0.521676		0.459958	0.408683
0.429155	0.456973		0.461169	0.408592
0.352805	0.517702		0.462085	0.408523
0.572341	0.367794		0.465452	0.408269
0.114617	0.54316		0.474618	0.407579
0.0672339	0.466685		0.477532	0.40736
0.150811	0.397262		0.479074	0.407243
0.07176	0.302106		0.484024	0.40687
0.659558	0.33745		0.48564	0.406749
0.493437	0.345664		0.485696	0.406745
0.63826	0.186194		0.488956	0.406499
0.327988	0.332043		0.493437	0.406162
-0.122032	0.297124		0.496837	0.405905
0.284175	0.195548		0.5042	0.405351
0.29872	0.214417		0.506091	0.405208
0.454119	0.426885		0.507453	0.405106
0.0746517	0.511923		0.511896	0.404771
0.507453	0.372123		0.516399	0.404432
0.199849	0.417452		0.522577	0.403967
0.336612	0.476811		0.545387	0.402249
0.479074	0.344263		0.553087	0.401668
0.418282	0.413234		0.553104	0.401667
-0.104349	0.392592		0.556163	0.401437
-0.144715	0.486655		0.571352	0.400293
0.40011	0.447545		0.572341	0.400218
0.262809	0.400778		0.587312	0.399091
0.474618	0.335002		0.589657	0.398914
0.0661615	0.504381		0.605474	0.397723
0.07333	0.317327		0.613224	0.397139
0.374375	0.267526		0.618035	0.396776
0.0710859	0.320681		0.63254	0.395684
-0.186511	0.325575		0.63826	0.395253
0.386464	0.258941		0.638834	0.39521
0.496837	0.242892		0.659558	0.393649
-0.118217	0.289616		0.675146	0.392475
0.048374	0.512781		0.677335	0.39231
0.315857	0.249966		0.682179	0.391945
0.0617697	0.345849		0.690704	0.391303
0.117208	0.408559		0.697393	0.390799
-0.048329	0.409456		0.69911	0.39067
0.368597	0.303663		0.720477	0.38906
0.205763	0.290213		0.723656	0.388821
0.207626	0.644712		0.723838	0.388807
0.33988	0.419811		0.733965	0.388044
0.179878	0.552317		0.742321	0.387415
0.0413125	0.48813		0.757275	0.386289
0.282155	0.435442		0.772655	0.38513
0.63254	0.361035		0.779349	0.384626
0.450549	0.510653		0.786415	0.384094
0.184845	0.383466		0.791387	0.383719
0.146436	0.346485		0.795151	0.383436
0.404881	0.35789		0.800621	0.383024
0.191969	0.471313		0.809764	0.382335
0.506091	0.324038		0.814504	0.381978
0.159373	0.366644		0.819199	0.381624
0.420507	0.531577		0.823793	0.381278
0.556163	0.417375		0.850872	0.379239
0.0377881	0.575967		0.859322	0.378602
0.757275	0.438807		0.8737	0.377519
0.311029	0.401259		0.884811	0.376682
0.212889	0.444481		0.900143	0.375528
0.392051	0.386717		0.906944	0.375015
0.465452	0.43476		0.913346	0.374533
0.461169	0.339832		0.926387	0.373551
0.252807	0.35933		0.94954	0.371807
0.398784	0.441634		0.951643	0.371648

## Sheet: panel l
Spatial spread (µm) (x)	Norm. # of modules
	Dataset	Null distribution
5	0	0
15	0	0
25	0	0
35	0	0.07542
45	0	0.17875
55	0	0.35042
65	0.00469	0.26958
75	0	0.11167
85	0.08451	0.01375
95	0.12207	0.0004166
105	0.16901	0
115	0.18779	0
125	0.13615	0
135	0.10329	0
145	0.0939	0
155	0.06103	0
165	0.03286	0
175	0	0
185	0.00469	0
195	0	0

[truncated: 2 more sheets: panel m left, panel m right]
